# Supplementary material
Source: publisher figshare collection journal article supplement (https://acs.figshare.com/ndownloader/files/12599642)

# Ligand-Enabled $\beta$ -C(sp<sup>3</sup>)-H Olefination of Free Carboxylic Acids

Zhe Zhuang,<sup>†,⊥</sup> Chang-Bin Yu,<sup>†,⊥</sup> Gang Chen,<sup>†</sup> Qing-Feng Wu,<sup>†</sup> Yi Hsiao,<sup>‡</sup>  
Candice L. Joe,<sup>‡</sup> Jennifer X. Qiao,<sup>§</sup> Michael. A. Poss,<sup>§</sup> and Jin-Quan Yu<sup>\*,†</sup>

<sup>†</sup>Department of Chemistry, The Scripps Research Institute, 10550 N. Torrey  
Pines Road, La Jolla, California 92037, United States

<sup>‡</sup>Chemical and Synthetic Development, Bristol-Myers Squibb, 1 Squibb  
Drive, New Brunswick, New Jersey 08903, United States

<sup>§</sup>Discovery Chemistry, Bristol-Myers Squibb Company, PO Box 4000, Princeton, New  
Jersey 08543, United States

## Table of Contents

|                                                                                     |     |
|-------------------------------------------------------------------------------------|-----|
| General Information                                                                 | S2  |
| Experimental Section                                                                |     |
| Preparation of Acetyl-Protected Aminoethyl Phenyl Thioether and Related Ligands     | S3  |
| Control Experiments for $\beta$ -C(sp <sup>3</sup> )-H Olefination                  | S4  |
| Oxidant Investigation for $\beta$ -C(sp <sup>3</sup> )-H Olefination                | S4  |
| Unactivated Olefin Scope for $\beta$ -C(sp <sup>3</sup> )-H Olefination             | S5  |
| Ligand Development for $\beta$ -C(sp <sup>3</sup> )-H Olefination of Propionic Acid | S6  |
| General Procedure for $\beta$ -C(sp <sup>3</sup> )-H Olefination                    | S7  |
| Substrate and Olefin Scope for $\beta$ -C(sp <sup>3</sup> )-H Olefination           | S8  |
| Gram-Scale Experiment and Synthetic Application                                     | S25 |
| Kinetic Experiments                                                                 | S28 |
| References                                                                          | S32 |
| <sup>1</sup> H and <sup>13</sup> C NMR Spectra                                      | S33 |

**General Information:** HFIP was obtained from Oakwood and other solvents were obtained from Sigma-Aldrich, Alfa-Aesar, and Acros and used directly without further purification. Pd(TFA)<sub>2</sub> and Pd(OAc)<sub>2</sub> was obtained from Strem. Ag<sub>2</sub>CO<sub>3</sub> was purchased from Sigma-Aldrich. Carboxylic acids were obtained from the commercial sources or synthesized following literature procedures. Other reagents were purchased at the highest commercial quality and used without further purification, unless otherwise stated. Analytical thin layer chromatography was performed on 0.25 mm silica gel 60-F254. Visualization was carried out with short-wave UV light or KMnO<sub>4</sub> and heat as developing agents. <sup>1</sup>H NMR spectra were recorded on Bruker DRX-600, DRX-500, and AMX-400 instruments. Chemical shifts were quoted in parts per million (ppm) referenced to 0.0 ppm for TMS. The following abbreviations (or combinations thereof) were used to explain multiplicities: s = singlet, d = doublet, t = triplet, q = quartet, m = multiplet, br = broad. Coupling constants, *J*, were reported in Hertz unit (Hz). <sup>13</sup>C NMR spectra were recorded on Bruker DRX-600 and DRX-500 and were fully decoupled by broad band proton decoupling. Chemical shifts were reported in ppm referenced to the center line of a triplet at 77.0 ppm of CDCl<sub>3</sub>. Column chromatography was performed using E. Merck silica (60, particle size 0.043–0.063 mm), and pTLC was performed on Merck silica plates (60F-254). High-resolution mass spectra (HRMS) were recorded on an Agilent Mass spectrometer using ESI-TOF (electrospray ionization-time of flight).

## Experimental Section

### Preparation of Acetyl-Protected Aminoethyl Phenyl Thioether and Related Ligands

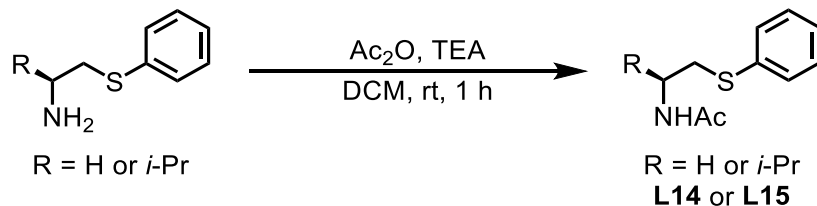

TEA (1.2 eq) and  $\text{Ac}_2\text{O}$  (1.2 eq) were added to the solution of the amine<sup>1, 2</sup> (5.0 mmol) in DCM (25 mL). The reaction was stirred at room temperature for 1 h. After completion, the reaction mixture was concentrated *in vacuo*, and the resulting mixture purified by column chromatography afforded the desired thioether ligand.

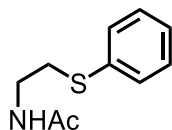

#### *N*-(2-(Phenylthio)ethyl)acetamide (**L14**)

$^1\text{H}$  NMR (600 MHz,  $\text{CDCl}_3$ )  $\delta$  7.43 – 7.35 (m, 2H), 7.35 – 7.25 (m, 2H), 7.25 – 7.17 (m, 1H), 5.83 (s, 1H), 3.47 (q,  $J = 6.1$  Hz, 2H), 3.12 – 3.03 (m, 2H), 1.94 (s, 3H);  $^{13}\text{C}$  NMR (150 MHz,  $\text{CDCl}_3$ )  $\delta$  170.11, 134.94, 129.76, 129.12, 126.57, 38.63, 33.65, 23.22; HRMS (ESI-TOF) Calcd for  $\text{C}_{10}\text{H}_{14}\text{NOS}$   $[\text{M}+\text{H}]^+$ : 196.0796; found: 196.0801.

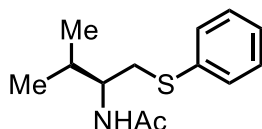

#### (*S*)-*N*-(3-Methyl-1-(phenylthio)butan-2-yl)acetamide (**L15**)

$^1\text{H}$  NMR (600 MHz,  $\text{CDCl}_3$ )  $\delta$  7.42 – 7.36 (m, 2H), 7.32 – 7.26 (m, 2H), 7.22 – 7.15 (m, 1H), 5.41 (d,  $J = 9.1$  Hz, 1H), 4.05 – 3.95 (m, 1H), 3.19 – 3.04 (m, 2H), 2.01 – 1.90 (m, 1H), 1.89 (s, 3H), 0.99 – 0.85 (m, 6H);  $^{13}\text{C}$  NMR (150 MHz,  $\text{CDCl}_3$ )  $\delta$  169.89, 136.31, 129.61, 129.05, 126.34, 54.10, 36.84, 30.48, 23.30, 19.37, 18.32; HRMS (ESI-TOF) Calcd for  $\text{C}_{13}\text{H}_{20}\text{NOS}$   $[\text{M}+\text{H}]^+$ : 238.1266; found: 238.1274.

**Table S1. Control Experiments for  $\beta$ -C(sp<sup>3</sup>)-H Olefination<sup>a,b</sup>**

| entry | variation from standard conditions                     | yield (%) |
|-------|--------------------------------------------------------|-----------|
| 1     | none                                                   | 90        |
| 2     | no Pd(OAc) <sub>2</sub>                                | 0         |
| 3     | no <b>L14</b>                                          | 16        |
| 4     | no Na <sub>2</sub> HPO <sub>4</sub> ·7H <sub>2</sub> O | 0         |
| 5     | no Ag <sub>2</sub> CO <sub>3</sub>                     | 0         |

<sup>a</sup>Conditions: **1b** (0.1 mmol), **2a** (2.0 eq), Pd(OAc)<sub>2</sub> (10 mol%), **L14** (10 mol%), Na<sub>2</sub>HPO<sub>4</sub>·7H<sub>2</sub>O (1.0 eq), Ag<sub>2</sub>CO<sub>3</sub> (1.0 eq), HFIP (1.0 mL), 90 °C, 12 h. <sup>b</sup>The yields were determined by <sup>1</sup>H NMR analysis of the crude product using CH<sub>2</sub>Br<sub>2</sub> as the internal standard.

**Table S2. Oxidant Investigation for  $\beta$ -C(sp<sup>3</sup>)-H Olefination<sup>a,b</sup>**

Reaction scheme showing the conversion of **1b** and **2a** to **3b** under the following conditions:

- $\text{Pd}(\text{OAc})_2$  (10 mol%)
- L14** (10 mol%)
- $\text{Na}_2\text{HPO}_4 \cdot 7\text{H}_2\text{O}$ , oxidant
- HFIP, 90 °C, 12 h

| entry | oxidant                         | yield (%) | entry | oxidant                                 | yield (%) |
|-------|---------------------------------|-----------|-------|-----------------------------------------|-----------|
| 1     | w/o oxidant                     | 0         | 7     | BQ + 1 atm O <sub>2</sub>               | 8         |
| 2     | Ag <sub>2</sub> CO <sub>3</sub> | 90        | 8     | Cu(OAc) <sub>2</sub>                    | 24        |
| 3     | AgOAc                           | 36        | 9     | Cu(TFA) <sub>2</sub> ·xH <sub>2</sub> O | 10        |
| 4     | AgTFA                           | 0         | 10    | CuF <sub>2</sub>                        | 8         |
| 5     | BQ                              | 6         | 11    | CuCl <sub>2</sub>                       | 0         |
| 6     | 1 atm O <sub>2</sub>            | 8         | 12    | CuCO <sub>3</sub>                       | 10        |

<sup>a</sup>Conditions: **1b** (0.1 mmol), **2a** (2.0 eq), Pd(OAc)<sub>2</sub> (10 mol%), **L14** (10 mol%), Na<sub>2</sub>HPO<sub>4</sub>·7H<sub>2</sub>O (1.0 eq), oxidant (1.0 eq), HFIP (1.0 mL), 90 °C, 12 h. <sup>b</sup>The yields were determined by <sup>1</sup>H NMR analysis of the crude product using CH<sub>2</sub>Br<sub>2</sub> as the internal standard.



**Table S3. Unactivated Olefin Scope for  $\beta$ -C(sp<sup>3</sup>)-H Olefination<sup>a,b</sup>**

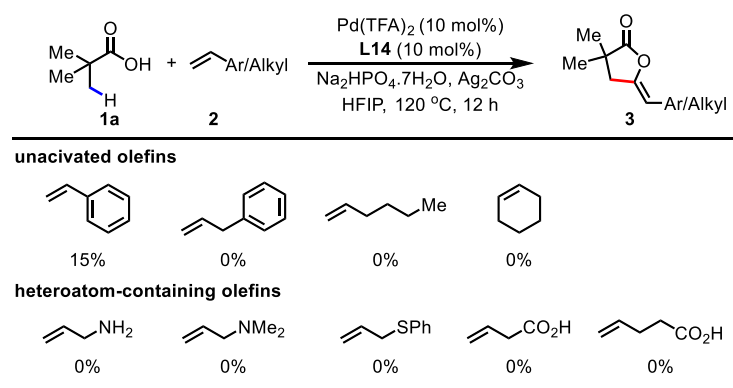

<sup>a</sup>Conditions: **1a** (0.1 mmol), **2** (2.0 eq), Pd(TFA)<sub>2</sub> (10 mol%), **L14** (10 mol%), Na<sub>2</sub>HPO<sub>4</sub>·7H<sub>2</sub>O (1.0 eq), Ag<sub>2</sub>CO<sub>3</sub> (1.0 eq), HFIP (1.0 mL), 120 °C, 12 h. <sup>b</sup>The yields were determined by <sup>1</sup>H NMR analysis of the crude product using CH<sub>2</sub>Br<sub>2</sub> as the internal standard.

**Table S4. Ligand Development for  $\beta$ -C(sp<sup>3</sup>)-H Olefination of Propionic Acid<sup>a,b</sup>**

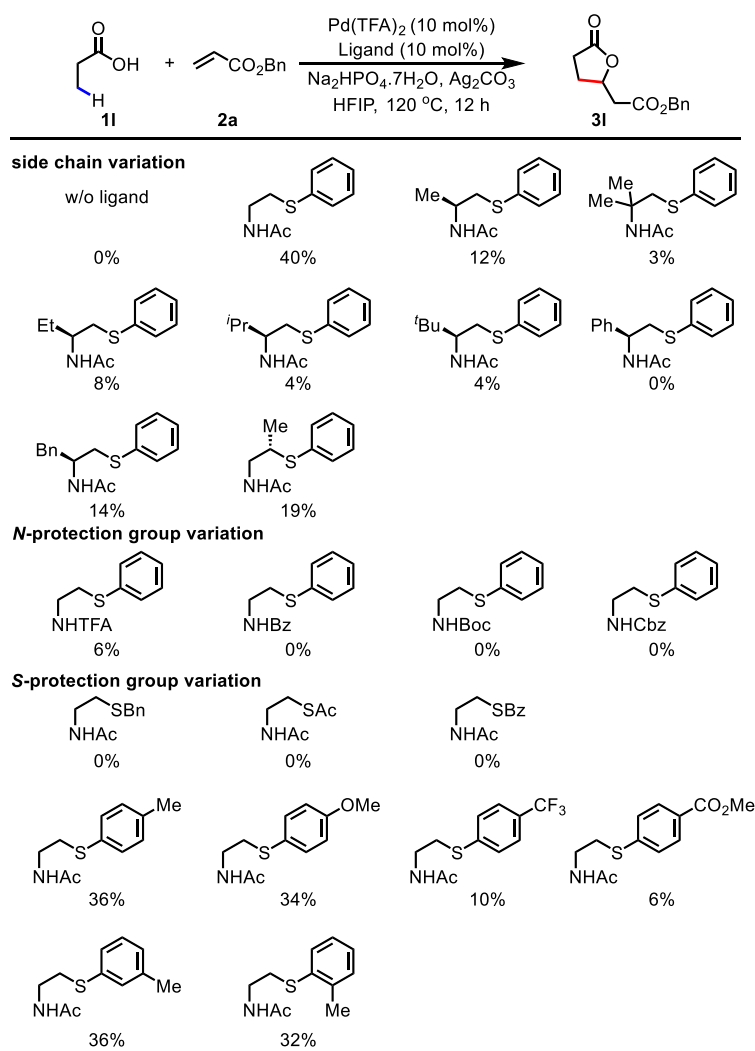

<sup>a</sup>Conditions: **1** (0.1 mmol), **2** (2.0 eq), Pd(TFA)<sub>2</sub> (10 mol%), ligand (10 mol%), Na<sub>2</sub>HPO<sub>4</sub>·7H<sub>2</sub>O (1.0 eq), Ag<sub>2</sub>CO<sub>3</sub> (1.0 eq), HFIP (1.0 mL), 120 °C, 12 h. <sup>b</sup>The yields were determined by <sup>1</sup>H NMR analysis of the crude product using CH<sub>2</sub>Br<sub>2</sub> as the internal standard.

### General Procedure for $\beta$ -C(sp<sup>3</sup>)-H Olefination

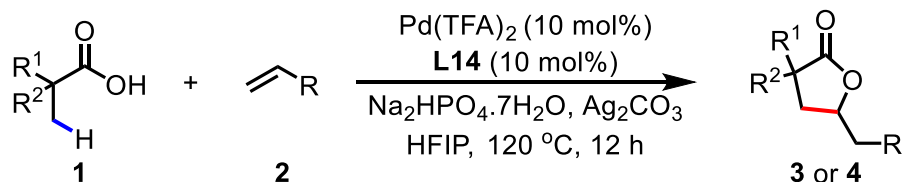

**General Procedure A:** In the control tube, Pd(TFA)<sub>2</sub> (10 mol%), ligand **L14** (10 mol%), Na<sub>2</sub>HPO<sub>4</sub>·7H<sub>2</sub>O (1.0 eq), Ag<sub>2</sub>CO<sub>3</sub> (1.0 eq), and carboxylic acid **1** (0.1 mmol) in order were weighed in air and placed with a magnetic stir bar. Then HFIP (1.0 mL) and olefin **2** (2.0 eq) were added. The reaction mixture was stirred at rt for 10 min, and then heated to 120 °C for 12 h (300 rpm). After being allowed to cool to room temperature, the mixture was diluted with DCM, and filtered through a pad of celite. The filtrate was concentrated *in vacuo*, and the resulting mixture purified by column chromatography (**4a-4k**) or pTLC (**3a-3x**) using hexane/EA (2/1) as the eluent.

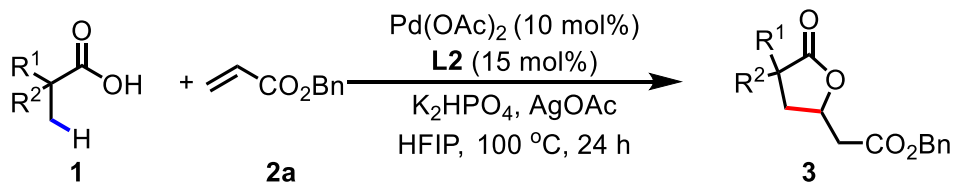

**General Procedure B:** In the control tube, Pd(OAc)<sub>2</sub> (10 mol%), K<sub>2</sub>HPO<sub>4</sub> (2.0 eq), AgOAc (2.0 eq), and carboxylic acid **1** (0.1 mmol) in order were weighed in air and placed with a magnetic stir bar. Then HFIP (1.0 mL), **L2** (15 mol%), and olefin **2** (2.0 eq) in order were added. The reaction mixture was stirred at room temperature for 10 min, and then heated to 100 °C for 24 h (300 rpm). After being allowed to cool to room temperature, the mixture was diluted with DCM, and filtered through a pad of celite. The filtrate was concentrated *in vacuo*, and the resulting mixture purified by pTLC using hexane/EA (2/1) as the eluent.

### Substrate and Olefin Scope for $\beta$ -C(sp<sup>3</sup>)-H Olefination

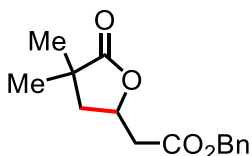

#### Benzyl 2-(4,4-dimethyl-5-oxotetrahydrofuran-2-yl)acetate (3a)

Following **General Procedure A** on 0.1 mmol scale. Purification by pTLC afforded the title compound (colorless oil, 25 mg, 95%). <sup>1</sup>H NMR (600 MHz, CDCl<sub>3</sub>)  $\delta$  7.42 – 7.30 (m, 5H), 5.16 (s, 2H), 4.85 (ddt,  $J$  = 9.9, 6.9, 6.1 Hz, 1H), 2.87 (dd,  $J$  = 16.3, 6.9 Hz, 1H), 2.66 (dd,  $J$  = 16.3, 6.1 Hz, 1H), 2.28 (dd,  $J$  = 12.8, 6.0 Hz, 1H), 1.82 (dd,  $J$  = 12.8, 9.9 Hz, 1H), 1.27 (s, 6H); <sup>13</sup>C NMR (150 MHz, CDCl<sub>3</sub>)  $\delta$  181.14, 169.42, 135.35, 128.63, 128.46, 128.36, 72.56, 66.83, 43.04, 40.31, 40.22, 24.93, 24.38; HRMS (ESI-TOF) Calcd for C<sub>15</sub>H<sub>19</sub>O<sub>4</sub> [M+H]<sup>+</sup>: 263.1278; found: 263.1277.

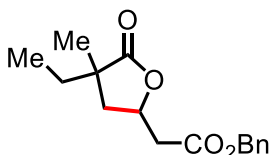

#### Benzyl 2-(4-ethyl-4-methyl-5-oxotetrahydrofuran-2-yl)acetate (3b)

Following **General Procedure A** on 0.1 mmol scale. Purification by pTLC afforded the title compound (colorless oil, 26.5 mg, 96%, dr = 1.0/1.0). Data for inseparable isomers: <sup>1</sup>H NMR (600 MHz, CDCl<sub>3</sub>)  $\delta$  7.44 – 7.29 (m, 10H), 5.16 (s, 4H), 4.89 – 4.74 (m, 2H), 2.92 – 2.81 (m, 2H), 2.71 – 2.57 (m, 2H), 2.39 (dd,  $J$  = 13.1, 6.6 Hz, 1H), 2.13 (dd,  $J$  = 12.8, 6.2 Hz, 1H), 1.87 (dd,  $J$  = 12.9, 10.0 Hz, 1H), 1.76 (dd,  $J$  = 13.1, 9.5 Hz, 1H), 1.70 – 1.53 (m, 4H), 1.25 (s, 3H), 1.23 (s, 3H), 0.96 (t,  $J$  = 7.5 Hz, 3H), 0.91 (t,  $J$  = 7.5 Hz, 3H); <sup>13</sup>C NMR (150 MHz, CDCl<sub>3</sub>)  $\delta$  180.79, 180.71, 169.43, 169.41, 135.35, 128.61, 128.43, 128.34, 72.66, 72.65, 66.80, 66.78, 44.40, 44.17, 40.60, 40.56, 40.25, 39.53, 30.37, 30.16, 22.83, 22.22, 8.73, 8.64; HRMS (ESI-TOF) Calcd for C<sub>16</sub>H<sub>21</sub>O<sub>4</sub> [M+H]<sup>+</sup>: 277.1434; found: 277.1432.

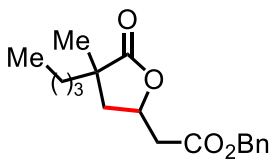

**Benzyl 2-(4-butyl-4-methyl-5-oxotetrahydrofuran-2-yl)acetate (3c)**

Following **General Procedure A** on 0.1 mmol scale. Purification by pTLC afforded the title compound (colorless oil, 29.0 mg, 95%, dr = 1.0/1.0). Data for inseparable isomers:  $^1\text{H}$  NMR (600 MHz,  $\text{CDCl}_3$ )  $\delta$  7.49 – 7.31 (m, 10H), 5.16 (s, 4H), 4.88 – 4.76 (m, 2H), 2.91 – 2.81 (m, 2H), 2.70 – 2.59 (m, 2H), 2.39 (dd,  $J$  = 13.1, 6.6 Hz, 1H), 2.15 (dd,  $J$  = 12.8, 6.1 Hz, 1H), 1.87 (dd,  $J$  = 12.8, 10.0 Hz, 1H), 1.76 (dd,  $J$  = 13.1, 9.5 Hz, 1H), 1.64 – 1.50 (m, 4H), 1.40 – 1.28 (m, 7H), 1.25 (s, 3H), 1.24 (s, 3H), 1.19 – 1.10 (m, 1H), 0.95 – 0.85 (m, 6H);  $^{13}\text{C}$  NMR (150 MHz,  $\text{CDCl}_3$ )  $\delta$  180.93, 180.85, 169.44, 135.35, 128.61, 128.44, 128.34, 72.70, 66.81, 66.79, 43.98, 43.84, 40.97, 40.59, 40.29, 40.12, 37.45, 37.18, 26.52, 26.51, 23.48, 22.95, 22.58, 13.92, 13.88; HRMS (ESI-TOF) Calcd for  $\text{C}_{18}\text{H}_{25}\text{O}_4$   $[\text{M}+\text{H}]^+$ : 305.1747; found: 305.1748.

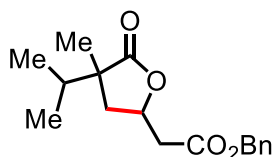**Benzyl 2-(4-isopropyl-4-methyl-5-oxotetrahydrofuran-2-yl)acetate (3d)**

Following **General Procedure A** on 0.1 mmol scale. Purification by pTLC afforded the title compound (colorless oil, 21.5 mg, 74%, dr = 1.0/1.0). Data for inseparable isomers:  $^1\text{H}$  NMR (600 MHz,  $\text{CDCl}_3$ )  $\delta$  7.42 – 7.31 (m, 10H), 5.20 – 5.08 (m, 4H), 4.86 – 4.82 (m, 1H), 4.80 – 4.72 (m, 1H), 2.91 – 2.82 (m, 2H), 2.69 – 2.61 (m, 2H), 2.49 (dd,  $J$  = 13.6, 7.4 Hz, 1H), 2.02 – 1.95 (m, 2H), 1.95 – 1.91 (m, 1H), 1.91 – 1.83 (m, 1H), 1.64 (dd,  $J$  = 13.5, 8.5 Hz, 1H), 1.27 (s, 3H), 1.22 (s, 3H), 0.99 – 0.84 (m, 12H);  $^{13}\text{C}$  NMR (150 MHz,  $\text{CDCl}_3$ )  $\delta$  181.07, 180.51, 169.44, 169.42, 135.35, 135.34, 128.60, 128.43, 128.34, 128.33, 72.91, 72.55, 66.80, 66.76, 48.04, 47.57, 41.10, 40.28, 37.54, 36.02, 33.67, 32.82, 22.61, 21.68, 18.29, 18.22, 17.04, 16.90; HRMS (ESI-TOF) Calcd for  $\text{C}_{17}\text{H}_{23}\text{O}_4$   $[\text{M}+\text{H}]^+$ : 291.1591; found: 291.1591.

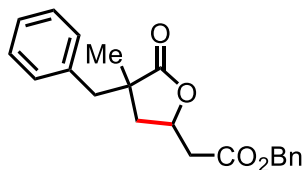**Benzyl 2-(4-benzyl-4-methyl-5-oxotetrahydrofuran-2-yl)acetate (3e)**

Following **General Procedure A** on 0.1 mmol scale. Purification by pTLC afforded the title compound (colorless oil, 31.0 mg, 91%, dr = 1.0/1.0). Data for inseparable isomers:  $^1\text{H}$  NMR (600 MHz,  $\text{CDCl}_3$ )  $\delta$  7.41 – 7.22 (m, 16H), 7.21 – 7.10 (m, 4H), 5.14 – 5.06 (m, 4H), 4.84 – 4.74 (m, 1H), 4.05 – 3.96 (m, 1H), 3.08 (d,  $J$  = 13.7 Hz, 1H), 3.00 (d,  $J$  = 13.4 Hz, 1H), 2.79 – 2.70 (m, 2H), 2.68 (d,  $J$  = 13.3 Hz, 1H), 2.59 (dd,  $J$  = 16.3, 6.9 Hz, 1H), 2.56 – 2.47 (m, 2H), 2.31 (dd,  $J$  = 16.3, 6.3 Hz, 1H), 2.05 (dd,  $J$  = 12.9, 6.4 Hz, 1H), 1.93 (dd,  $J$  = 12.9, 9.5 Hz, 1H), 1.72 (dd,  $J$  = 13.3, 9.5 Hz, 1H), 1.32 (s, 3H), 1.31 (s, 3H);  $^{13}\text{C}$  NMR (150 MHz,  $\text{CDCl}_3$ )  $\delta$  180.80, 180.46, 169.37, 169.15, 136.77, 136.18, 135.35, 135.31, 130.12, 129.80, 128.60, 128.56, 128.47, 128.43, 128.42, 128.32, 128.29, 127.25, 126.95, 72.77, 72.62, 66.72, 66.71, 45.74, 45.51, 44.03, 43.34, 40.41, 40.00, 39.62, 38.95, 24.96, 23.62; HRMS (ESI-TOF) Calcd for  $\text{C}_{21}\text{H}_{23}\text{O}_4$   $[\text{M}+\text{H}]^+$ : 339.1591; found: 339.1596.

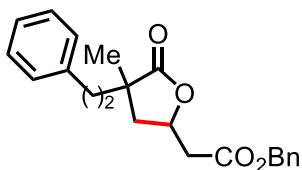

**Benzyl 2-(4-methyl-5-oxo-4-phenethyltetrahydrofuran-2-yl)acetate (3f)**

Following **General Procedure A** on 0.1 mmol scale. Purification by pTLC afforded the title compound (colorless oil, 33.5 mg, 95%, dr = 1.0/1.0). Data for inseparable isomers:  $^1\text{H}$  NMR (600 MHz,  $\text{CDCl}_3$ )  $\delta$  7.41 – 7.31 (m, 9H), 7.31 – 7.23 (m, 5H), 7.22 – 7.11 (m, 6H), 5.16 (s, 4H), 4.92 – 4.82 (m, 2H), 2.95 – 2.83 (m, 2H), 2.80 – 2.57 (m, 5H), 2.55 – 2.41 (m, 2H), 2.20 (dd,  $J$  = 12.8, 6.1 Hz, 1H), 2.01 – 1.77 (m, 6H), 1.33 (s, 3H), 1.32 (s, 3H);  $^{13}\text{C}$  NMR (150 MHz,  $\text{CDCl}_3$ )  $\delta$  180.46, 180.44, 169.41, 169.38, 141.24, 140.99, 135.32, 130.01, 129.08, 128.64, 128.54, 128.49, 128.48, 128.39, 128.38, 128.29, 128.24, 126.17, 126.08, 125.88, 72.80, 72.76, 66.88, 66.87, 44.06, 43.93, 41.20, 40.54, 40.20, 40.17, 39.57, 39.31, 30.79, 30.78, 23.33, 22.60; HRMS (ESI-TOF) Calcd for  $\text{C}_{22}\text{H}_{25}\text{O}_4$   $[\text{M}+\text{H}]^+$ : 353.1747; found: 353.1746.

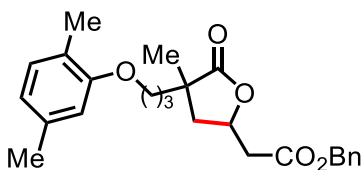

**Benzyl 2-(4-(3-(2,5-dimethylphenoxy)propyl)-4-methyl-5-oxotetrahydrofuran-2-yl)acetate (3g)**

Following **General Procedure A** on 0.1 mmol scale. Purification by pTLC afforded the title compound (colorless oil, 33.0 mg, 81%, dr = 1.0/1.0). Data for inseparable isomers:  $^1\text{H}$  NMR (600 MHz,  $\text{CDCl}_3$ )  $\delta$  7.43 – 7.30 (m, 10H), 7.00 (d,  $J$  = 7.5 Hz, 2H), 6.66 (d,  $J$  = 7.5 Hz, 2H), 6.60 (s, 2H), 5.21 – 5.11 (m, 4H), 4.91 – 4.80 (m, 2H), 4.00 – 3.89 (m, 4H), 2.92 – 2.84 (m, 2H), 2.71 – 2.63 (m, 2H), 2.43 (dd,  $J$  = 13.1, 6.6 Hz, 1H), 2.30 (s, 6H), 2.21 (dd,  $J$  = 12.8, 6.1 Hz, 1H), 2.16 (s, 6H), 1.97 – 1.86 (m, 3H), 1.86 – 1.64 (m, 7H), 1.31 (s, 3H), 1.30 (s, 3H);  $^{13}\text{C}$  NMR (150 MHz,  $\text{CDCl}_3$ )  $\delta$  180.47, 180.43, 169.37, 169.33, 156.73, 156.70, 136.50, 136.48, 135.33, 130.33, 130.31, 128.62, 128.45, 128.35, 123.49, 120.88, 120.83, 111.94, 111.93, 72.73, 72.68, 67.49, 67.33, 66.83, 66.81, 43.78, 43.56, 41.16, 40.52, 40.23, 40.18, 34.19, 34.08, 24.61, 24.58, 23.22, 22.51, 21.37, 15.77, 15.75; HRMS (ESI-TOF) Calcd for  $\text{C}_{25}\text{H}_{31}\text{O}_5$   $[\text{M}+\text{H}]^+$ : 411.2166; found: 411.2167.

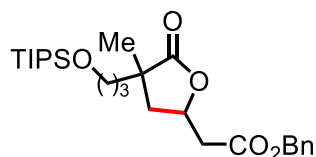

**Benzyl 2-(4-methyl-5-oxo-4-(3-((triisopropylsilyl)oxy)propyl)tetrahydrofuran-2-yl)acetate (3h)**

Following **General Procedure A** on 0.1 mmol scale. Purification by pTLC afforded the title compound (colorless oil, 41.5 mg, 90%, dr = 1.0/1.0). Data for inseparable isomers:  $^1\text{H}$  NMR (600 MHz,  $\text{CDCl}_3$ )  $\delta$  7.43 – 7.30 (m, 10H), 5.15 (s, 4H), 4.91 – 4.76 (m, 2H), 3.73 – 3.63 (m, 4H), 2.92 – 2.81 (m, 2H), 2.65 (dd,  $J$  = 16.3, 6.1 Hz, 2H), 2.40 (dd,  $J$  = 13.1, 6.5 Hz, 1H), 2.17 (dd,  $J$  = 12.8, 6.1 Hz, 1H), 1.88 (dd,  $J$  = 12.9, 10.0 Hz, 1H), 1.78 (dd,  $J$  = 13.1, 9.5 Hz, 1H), 1.74 – 1.57 (m, 6H), 1.57 – 1.48 (m, 1H), 1.48 – 1.39 (m, 1H), 1.27 (s, 3H), 1.25 (s, 3H), 1.13 – 0.97 (m, 21H);  $^{13}\text{C}$  NMR (150 MHz,  $\text{CDCl}_3$ )  $\delta$  180.75, 180.67, 169.43, 169.37, 135.36, 135.36, 128.62, 128.44, 128.35, 72.70, 72.66, 66.81, 66.79, 63.17, 62.97, 43.75, 43.57, 41.06, 40.58, 40.28, 33.87, 33.82, 27.94, 27.89, 23.23, 22.51, 18.00, 11.93, 11.92; HRMS (ESI-TOF) Calcd for  $\text{C}_{26}\text{H}_{43}\text{O}_5\text{Si}$   $[\text{M}+\text{H}]^+$ : 463.2874; found: 463.2870.

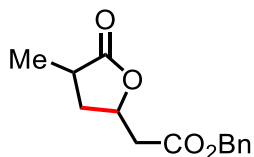

**Benzyl 2-(4-methyl-5-oxotetrahydrofuran-2-yl)acetate (3i)**

Following **General Procedure A** on 0.1 mmol scale. Purification by pTLC afforded the title compound (colorless oil, 17.5 mg, 71%, dr = 1.8/1.0). Data for inseparable isomers:  $^1\text{H}$  NMR (600 MHz,  $\text{CDCl}_3$ )  $\delta$  7.44 – 7.30 (m, 14H), 5.16 (s, 5.6H), 4.99 – 4.90 (m, 1H), 4.82 – 4.73 (m, 1.8H), 2.88 (dd,  $J$  = 16.3, 6.9 Hz, 1.8H), 2.83 (dd,  $J$  = 16.1, 6.7 Hz, 1H), 2.76 – 2.57 (m, 7.4H), 2.25 – 2.17 (m, 1H), 2.11 (dt,  $J$  = 13.1, 7.7 Hz, 1H), 1.64 – 1.57 (m, 1.8H), 1.29 (d,  $J$  = 7.3 Hz, 3H), 1.27 (d,  $J$  = 7.0 Hz, 5.4H);  $^{13}\text{C}$  NMR (150 MHz,  $\text{CDCl}_3$ )  $\delta$  179.22, 178.67, 169.34, 169.33, 135.33, 135.30, 128.64, 128.63, 128.48, 128.46, 128.37, 128.35, 73.91, 73.84, 66.85, 66.83, 40.05, 39.83, 36.89, 35.66, 34.99, 33.65, 15.79, 14.98; HRMS (ESI-TOF) Calcd for  $\text{C}_{14}\text{H}_{17}\text{O}_4$   $[\text{M}+\text{H}]^+$ : 249.1127; found: 249.1128.

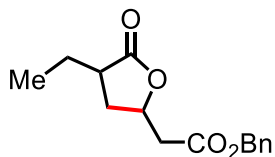

**Benzyl 2-(4-ethyl-5-oxotetrahydrofuran-2-yl)acetate (3j)**

Following **General Procedure A** on 0.1 mmol scale. Purification by pTLC afforded the title compound (colorless oil, 16.0 mg, 62%, dr = 1.2/1.0). Data for inseparable isomers:  $^1\text{H}$  NMR (600 MHz,  $\text{CDCl}_3$ )  $\delta$  7.45 – 7.30 (m, 11H), 5.16 (s, 4.4H), 4.95 – 4.86 (m, 1H), 4.81 – 4.73 (m, 1.2H), 2.89 (dd,  $J$  = 16.3, 6.8 Hz, 1.2H), 2.83 (dd,  $J$  = 16.1, 6.6 Hz, 1H), 2.72 – 2.61 (m, 2.2H), 2.62 – 2.53 (m, 3.2H), 2.21 – 2.10 (m, 1.2H), 1.98 – 1.89 (m, 1.2H), 1.90 – 1.81 (m, 1H), 1.65 – 1.53 (m, 3.2H), 1.54 – 1.44 (m, 1.2H), 1.04 – 0.94 (m, 6.6H);  $^{13}\text{C}$  NMR (150 MHz,  $\text{CDCl}_3$ )  $\delta$  178.49, 177.92, 169.38, 169.36, 135.34, 135.31, 128.63, 128.63, 128.48, 128.46, 128.37, 128.36, 74.14, 74.07, 66.84, 66.83, 42.11, 40.34, 40.12, 40.04, 34.27, 32.61, 23.91, 23.21, 11.60, 11.56; HRMS (ESI-TOF) Calcd for  $\text{C}_{15}\text{H}_{19}\text{O}_4$   $[\text{M}+\text{H}]^+$ : 263.1283; found: 263.1286.



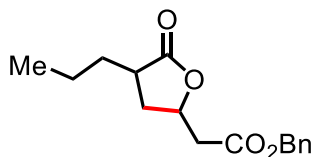

**Benzyl 2-(5-oxo-4-propyltetrahydrofuran-2-yl)acetate (3k)**

Following **General Procedure A** on 0.1 mmol scale. Purification by pTLC afforded the title compound (colorless oil, 12.0 mg, 44%, dr = 1.8/1.0). Data for inseparable isomers:  $^1\text{H}$  NMR (600 MHz,  $\text{CDCl}_3$ )  $\delta$  7.46 – 7.30 (m, 14H), 5.16 (s, 5.6H), 4.96 – 4.88 (m, 1H), 4.81 – 4.72 (m, 1.8H), 2.89 (dd,  $J$  = 16.3, 6.8 Hz, 1.8H), 2.83 (dd,  $J$  = 16.1, 6.5 Hz, 1H), 2.70 – 2.53 (m, 7.4H), 2.18 – 2.10 (m, 1.8H), 1.93 – 1.84 (m, 1.8H), 1.84 – 1.77 (m, 1H), 1.65 – 1.57 (m, 1.8H), 1.51 – 1.34 (m, 8.6H), 1.00 – 0.89 (m, 8.4H);  $^{13}\text{C}$  NMR (150 MHz,  $\text{CDCl}_3$ )  $\delta$  178.73, 178.19, 169.39, 169.37, 135.34, 135.31, 128.64, 128.63, 128.48, 128.47, 128.37, 128.37, 74.15, 74.12, 66.85, 66.83, 40.51, 40.11, 40.01, 38.73, 34.86, 33.08, 32.82, 32.28, 20.50, 20.47, 13.76, 13.73; HRMS (ESI-TOF) Calcd for  $\text{C}_{16}\text{H}_{21}\text{O}_4$   $[\text{M}+\text{H}]^+$ : 277.1440; found: 277.1445.

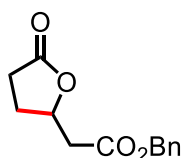

**Benzyl 2-(5-oxotetrahydrofuran-2-yl)acetate (3l)**

Following **General Procedure A** on 0.1 mmol scale. Purification by pTLC afforded the title compound (colorless oil, 9.0 mg, 40%).  $^1\text{H}$  NMR (600 MHz,  $\text{CDCl}_3$ )  $\delta$  7.42 – 7.30 (m, 5H), 5.16 (s, 2H), 4.96 – 4.87 (m, 1H), 2.87 (dd,  $J$  = 16.3, 6.5 Hz, 1H), 2.69 (dd,  $J$  = 16.3, 6.4 Hz, 1H), 2.60 – 2.52 (m, 2H), 2.50 – 2.41 (m, 1H), 2.02 – 1.91 (m, 1H);  $^{13}\text{C}$  NMR (150 MHz,  $\text{CDCl}_3$ )  $\delta$  176.33, 169.27, 135.31, 128.65, 128.50, 128.38, 76.13, 66.87, 40.00, 28.44, 27.60; HRMS (ESI-TOF) Calcd for  $\text{C}_{13}\text{H}_{15}\text{O}_4$   $[\text{M}+\text{H}]^+$ : 235.0970; found: 235.0972.

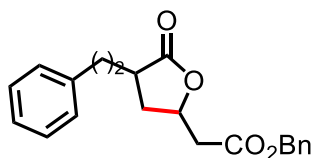

**Benzyl 2-(5-oxo-4-phenethyltetrahydrofuran-2-yl)acetate (3m)**

Following **General Procedure A** on 0.1 mmol scale. Purification by pTLC afforded the title compound (colorless oil, 17.5 mg, 52%, dr = 2.0/1.0). Data for inseparable isomers:  $^1\text{H}$  NMR (600 MHz,  $\text{CDCl}_3$ )  $\delta$  7.45 – 7.34 (m, 15H), 7.34 – 7.29 (m, 6H), 7.27 – 7.15 (m, 9H), 5.18 (s, 4H), 5.18 (s, 2H), 4.99 – 4.93 (m, 1H), 4.79 – 4.72 (m, 2H), 2.91 (dd,  $J$  = 16.3, 6.7 Hz, 2H), 2.87 – 2.55 (m, 16H), 2.34 – 2.24 (m, 2H), 2.24 – 2.14 (m, 3H), 1.86 – 1.79 (m, 1H), 1.79 – 1.71 (m, 2H), 1.68 – 1.61 (m, 1H);  $^{13}\text{C}$  NMR (150 MHz,  $\text{CDCl}_3$ )  $\delta$  178.33, 177.90, 169.32, 169.29, 140.58, 140.54, 135.32, 135.29, 129.90, 128.64, 128.63, 128.53, 128.52, 128.48, 128.42, 128.39, 128.38, 128.37, 126.25, 126.24, 74.09, 66.85, 66.84, 40.03, 39.95, 39.83, 38.07, 34.95, 33.24, 33.21, 33.17, 32.46, 31.82, 28.29; HRMS (ESI-TOF) Calcd for  $\text{C}_{21}\text{H}_{23}\text{O}_4$   $[\text{M}+\text{H}]^+$ : 339.1596; found: 339.1598.

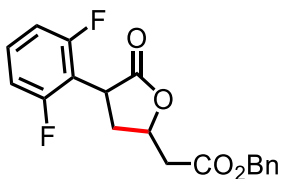

**Benzyl 2-(4-(2,6-difluorophenyl)-5-oxotetrahydrofuran-2-yl)acetate (3n)**

Following **General Procedure A** on 0.1 mmol scale. Purification by pTLC afforded the title compound (colorless oil, 16.5 mg, 48%, dr = 2.0/1.0). Data for inseparable isomers:  $^1\text{H}$  NMR (500 MHz,  $\text{CDCl}_3$ )  $\delta$  7.43 – 7.31 (m, 15H), 7.31 – 7.20 (m, 3H), 6.97 – 6.86 (m, 6H), 5.15 – 5.10 (m, 7H), 5.04 – 4.92 (m, 2H), 4.36 – 4.20 (m, 3H), 3.02 (dd,  $J$  = 16.4, 6.9 Hz, 2H), 2.91 (dd,  $J$  = 16.3, 6.1 Hz, 1H), 2.87 – 2.73 (m, 5H), 2.65 – 2.55 (m, 1H), 2.55 – 2.45 (m, 1H), 2.24 – 2.11 (m, 2H);  $^{13}\text{C}$  NMR (125 MHz,  $\text{CDCl}_3$ )  $\delta$  175.26, 174.46, 169.15, 161.09 (dd,  $J$  = 249.0, 7.2 Hz), 160.96 (dd,  $J$  = 248.9, 7.6 Hz), 135.27, 135.22, 129.77 (t,  $J$  = 10.8 Hz), 129.66 (t,  $J$  = 10.7 Hz), 128.64, 128.62, 128.49, 128.45, 128.37, 128.34, 113.90 (t,  $J$  = 18.3 Hz), 113.03 (t,  $J$  = 18.0 Hz), 111.74 (d,  $J$  = 3.3 Hz), 111.57 (d,  $J$  = 3.3 Hz), 74.56, 74.36, 66.91, 66.89, 40.14, 39.66, 36.41, 35.43, 34.15, 33.71; HRMS (ESI-TOF) Calcd for  $\text{C}_{19}\text{H}_{17}\text{F}_2\text{O}_4$   $[\text{M}+\text{H}]^+$ : 347.1095; found: 347.1092.

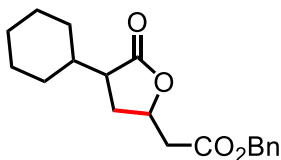

**Benzyl 2-(4-cyclohexyl-5-oxotetrahydrofuran-2-yl)acetate (3o)**

Following **General Procedure A** on 0.1 mmol scale. Purification by pTLC afforded the title compound (colorless oil, 14.0 mg, 44%, dr = 1.0/1.0). Data for inseparable isomers:  $^1\text{H}$  NMR (600 MHz,  $\text{CDCl}_3$ )  $\delta$  7.44 – 7.29 (m, 10H), 5.15 (s, 2H), 5.15 (s, 2H), 4.89 – 4.81 (m, 1H), 4.77 – 4.69 (m, 1H), 2.88 (dd,  $J$  = 16.2, 6.7 Hz, 1H), 2.82 (dd,  $J$  = 16.1, 6.5 Hz, 1H), 2.69 – 2.60 (m, 2H), 2.60 – 2.51 (m, 2H), 2.42 – 2.34 (m, 1H), 2.32 – 2.26 (m, 1H), 2.04 – 1.96 (m, 1H), 1.92 – 1.85 (m, 1H), 1.82 – 1.71 (m, 8H), 1.71 – 1.63 (m, 3H), 1.63 – 1.51 (m, 3H), 1.33 – 1.23 (m, 4H), 1.12 – 0.98 (m, 4H);  $^{13}\text{C}$  NMR (150 MHz,  $\text{CDCl}_3$ )  $\delta$  178.01, 177.24, 169.43, 169.40, 135.36, 135.35, 128.64, 128.63, 128.47, 128.46, 128.37, 74.45, 73.89, 66.82, 66.81, 46.13, 44.76, 40.30, 40.11, 38.66, 37.27, 31.21, 30.90, 30.85, 29.91, 28.90, 28.49, 26.22, 26.17, 26.11, 26.01, 25.99; HRMS (ESI-TOF) Calcd for  $\text{C}_{19}\text{H}_{25}\text{O}_4$   $[\text{M}+\text{H}]^+$ : 317.1753; found: 317.1754.

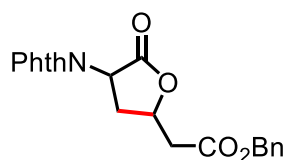**Benzyl 2-(4-(1,3-dioxisoindolin-2-yl)-5-oxotetrahydrofuran-2-yl)acetate (3p)**

Following **General Procedure A** on 0.1 mmol scale with the following modification:  $\text{Pd}(\text{OAc})_2$  (10 mol%), **L12** (10 mol%),  $\text{CsOAc}$  (1.0 eq), and  $\text{Ag}_2\text{CO}_3$  (1.0 eq). Purification by pTLC afforded the title compound (colorless oil, 15.0 mg, 40%, dr = 2.1/1.0). Data for inseparable isomers:  $^1\text{H}$  NMR (400 MHz,  $\text{CDCl}_3$ )  $\delta$  7.93 – 7.83 (m, 6.2H), 7.83 – 7.71 (m, 6.2H), 7.44 – 7.29 (m, 15.5H), 5.28 – 5.11 (m, 10.3H), 4.99 (dq,  $J$  = 10.0, 6.4 Hz, 2.1H), 3.12 (dd,  $J$  = 16.5, 6.8 Hz, 2.1H), 2.97 – 2.71 (m, 7.2H), 2.59 – 2.43 (m, 3.1H);  $^{13}\text{C}$  NMR (125 MHz,  $\text{CDCl}_3$ )  $\delta$  171.95, 171.02, 169.03, 168.98, 166.81, 166.77, 135.26, 135.17, 134.51, 134.49, 131.63, 131.60, 128.68, 128.64, 128.55, 128.48, 128.43, 128.35, 123.77, 73.96, 73.51, 66.99, 66.96, 48.08, 46.58, 40.19, 39.43, 32.21, 31.12; HRMS (ESI-TOF) Calcd for  $\text{C}_{21}\text{H}_{18}\text{NO}_6$   $[\text{M}+\text{H}]^+$ : 380.1129; found: 380.1131.

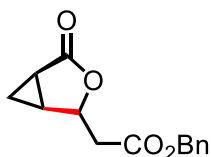

**Benzyl 2-(4-oxo-3-oxabicyclo[3.1.0]hexan-2-yl)acetate (3q)**

Following **General Procedure A** on 0.1 mmol scale. Purification by pTLC afforded the title compound (colorless oil, 13.0 mg, 52%, dr = 1.6/1.0). Data for inseparable isomers:  $^1\text{H}$  NMR (600 MHz,  $\text{CDCl}_3$ )  $\delta$  7.43 – 7.32 (m, 13H), 5.17 (s, 3.2H), 5.17 (s, 2H), 5.08 – 4.98 (m, 1H), 4.74 (t,  $J$  = 6.5 Hz, 1.6H), 2.90 – 2.80 (m, 2.6H), 2.73 (dd,  $J$  = 16.2, 6.9 Hz, 1.6H), 2.64 (dd,  $J$  = 16.4, 7.5 Hz, 1H), 2.40 – 2.32 (m, 1H), 2.20 – 2.10 (m, 2.6H), 2.12 – 2.04 (m, 1.6H), 1.34 – 1.23 (m, 1.6H), 1.19 – 1.11 (m, 1H), 0.98 – 0.91 (m, 1.6H), 0.93 – 0.86 (m, 1H);  $^{13}\text{C}$  NMR (150 MHz,  $\text{CDCl}_3$ )  $\delta$  175.19, 175.15, 169.35, 169.02, 135.29, 135.27, 128.64, 128.63, 128.49, 128.43, 128.34, 76.54, 74.87, 66.89, 66.86, 40.41, 37.27, 22.18, 20.86, 18.47, 17.61, 12.55, 9.02; HRMS (ESI-TOF) Calcd for  $\text{C}_{14}\text{H}_{15}\text{O}_4$   $[\text{M}+\text{H}]^+$ : 247.0970; found: 247.0972.

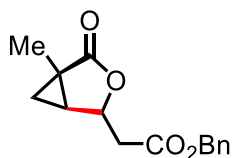**Benzyl 2-(5-methyl-4-oxo-3-oxabicyclo[3.1.0]hexan-2-yl)acetate (3r)**

Following **General Procedure A** on 0.1 mmol scale. Purification by pTLC afforded the title compound (colorless oil, 12.5 mg, 48%, dr = 1.3/1.0). Data for inseparable isomers:  $^1\text{H}$  NMR (600 MHz,  $\text{CDCl}_3$ )  $\delta$  7.42 – 7.31 (m, 11.5H), 5.16 (s, 4.6H), 4.97 (td,  $J$  = 6.9, 4.3 Hz, 1H), 4.62 (t,  $J$  = 6.2 Hz, 1.3H), 2.85 – 2.75 (m, 2.3H), 2.72 (dd,  $J$  = 16.2, 6.5 Hz, 1.3H), 2.59 (dd,  $J$  = 16.4, 7.4 Hz, 1H), 2.17 (dt,  $J$  = 7.4, 4.5 Hz, 1H), 1.97 (dd,  $J$  = 7.6, 4.2 Hz, 1.3H), 1.41 (s, 3H), 1.40 (s, 3.9H), 1.10 (dd,  $J$  = 7.6, 4.9 Hz, 1.3H), 1.00 (t,  $J$  = 4.5 Hz, 1.3H), 0.99 – 0.92 (m, 2H);  $^{13}\text{C}$  NMR (150 MHz,  $\text{CDCl}_3$ )  $\delta$  177.30, 177.16, 169.43, 169.03, 135.33, 135.30, 128.62, 128.61, 128.45, 128.37, 128.32, 75.42, 73.71, 66.82, 66.80, 40.49, 37.14, 27.90, 26.68, 24.61, 24.03, 19.30, 15.56, 14.31, 14.06; HRMS (ESI-TOF) Calcd for  $\text{C}_{15}\text{H}_{17}\text{O}_4$   $[\text{M}+\text{H}]^+$ : 261.1127; found: 261.1131.

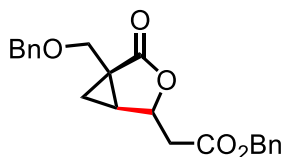**Benzyl 2-(5-((benzyloxy)methyl)-4-oxo-3-oxabicyclo[3.1.0]hexan-2-yl)acetate (3s)**

Following **General Procedure A** on 0.1 mmol scale. Purification by pTLC afforded the title compound (colorless oil, 23.0 mg, 62%, dr = 1.3/1.0). Data for inseparable isomers:  $^1\text{H}$  NMR (600 MHz,  $\text{CDCl}_3$ )  $\delta$  7.45 – 7.29 (m, 23H), 5.18 (s, 4.6H), 5.00 (td,  $J$  = 7.0, 4.5 Hz, 1H), 4.73 (t,  $J$  = 6.5 Hz, 1.3H), 4.61 (d,  $J$  = 12.1 Hz, 2.3H), 4.55 (d,  $J$  = 12.1 Hz, 2.3H), 4.13 (d,  $J$  = 10.8 Hz, 1H), 4.11 (d,  $J$  = 10.6 Hz, 1.3H), 3.48 (d,  $J$  = 10.8 Hz, 1H), 3.45 (d,  $J$  = 10.7 Hz, 1.3H), 2.90 – 2.80 (m, 2.3H), 2.75 (dd,  $J$  = 16.3, 6.8 Hz, 1.3H), 2.63 (dd,  $J$  = 16.4, 7.4 Hz, 1H), 2.43 (dt,  $J$  = 8.4, 4.5 Hz, 1H), 2.21 (dd,  $J$  = 7.8, 4.5 Hz, 1.3H), 1.38 (dd,  $J$  = 7.8, 5.0 Hz, 1.3H), 1.23 (dd,  $J$  = 7.7, 5.2 Hz, 1H), 1.06 (t,  $J$  = 4.8 Hz, 1.3H), 1.01 (t,  $J$  = 4.9 Hz, 1H);  $^{13}\text{C}$  NMR (150 MHz,  $\text{CDCl}_3$ )  $\delta$  175.24, 175.19, 169.27, 169.09, 137.85, 137.78, 135.33, 135.29, 128.63, 128.61, 128.48, 128.44, 128.42, 128.39, 128.35, 128.33, 127.77, 127.69, 127.64, 127.54, 75.47, 73.94, 73.24, 73.17, 66.95, 66.87, 66.85, 66.83, 40.45, 37.23, 29.93, 29.25, 26.21, 25.04, 16.40, 12.90; HRMS (ESI-TOF) Calcd for  $\text{C}_{22}\text{H}_{23}\text{O}_5$   $[\text{M}+\text{H}]^+$ : 367.1545; found: 367.1543.

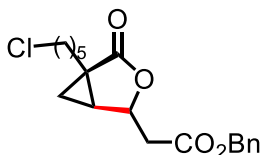

**Benzyl 2-(5-(5-chloropentyl)-4-oxo-3-oxabicyclo[3.1.0]hexan-2-yl)acetate (3t)**

Following **General Procedure A** on 0.1 mmol scale. Purification by pTLC afforded the title compound (colorless oil, 16.5 mg, 47%, dr = 1.2/1.0). Data for inseparable isomers:  $^1\text{H}$  NMR (600 MHz,  $\text{CDCl}_3$ )  $\delta$  7.46 – 7.30 (m, 11H), 5.26 – 5.09 (m, 4.4H), 4.95 (td,  $J$  = 7.0, 4.3 Hz, 1H), 4.65 (t,  $J$  = 6.6 Hz, 1.2H), 3.56 – 3.50 (m, 4.4H), 2.80 (dd,  $J$  = 15.9, 6.4 Hz, 2.2H), 2.66 (dd,  $J$  = 16.1, 6.8 Hz, 1.2H), 2.60 (dd,  $J$  = 16.4, 7.4 Hz, 1H), 2.22 – 2.16 (m, 1H), 2.01 – 1.90 (m, 3.4H), 1.82 – 1.73 (m, 4.4H), 1.52 – 1.37 (m, 11H), 1.14 (dd,  $J$  = 7.7, 5.0 Hz, 1.2H), 1.03 – 0.96 (m, 2.2H), 0.94 (t,  $J$  = 4.7 Hz, 1H);  $^{13}\text{C}$  NMR (150 MHz,  $\text{CDCl}_3$ )  $\delta$  176.68, 176.51, 169.45, 169.00, 135.31, 135.28, 128.63, 128.49, 128.48, 128.37, 128.34, 75.35, 73.81, 66.89, 66.83, 44.89, 44.87, 40.71, 37.17, 32.25, 32.24, 29.19, 28.53, 28.41, 28.36, 26.88, 26.67, 26.55, 26.42, 26.31, 25.62, 18.11, 14.35; HRMS (ESI-TOF) Calcd for  $\text{C}_{19}\text{H}_{24}\text{ClO}_4$   $[\text{M}+\text{H}]^+$ : 351.1363; found: 351.1359.

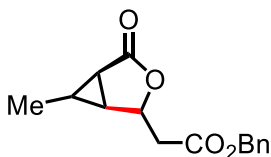

**Benzyl 2-(6-methyl-4-oxo-3-oxabicyclo[3.1.0]hexan-2-yl)acetate (3u)**

Following **General Procedure A** on 0.1 mmol scale. Purification by pTLC afforded the title compound (colorless oil, 11.0 mg, 42%, dr = 1.4/1.0). Data for inseparable isomers:  $^1\text{H}$  NMR (600 MHz,  $\text{CDCl}_3$ )  $\delta$  7.44 – 7.31 (m, 12H), 5.16 (s, 4.8H), 4.99 – 4.92 (m, 1H), 4.73 (t,  $J$  = 6.5 Hz, 1.4H), 2.89 – 2.78 (m, 2.4H), 2.68 (dd,  $J$  = 16.1, 7.0 Hz, 1.4H), 2.63 (dd,  $J$  = 16.2, 7.5 Hz, 1H), 2.14 – 2.07 (m, 1H), 1.91 (dd,  $J$  = 5.7, 3.7 Hz, 1.4H), 1.87 (dd,  $J$  = 5.8, 2.7 Hz, 1H), 1.82 (ddd,  $J$  = 5.7, 2.8, 1.0 Hz, 1.4H), 1.33 – 1.22 (m, 2.4H), 1.14 (d,  $J$  = 6.0 Hz, 4.2H), 1.12 (d,  $J$  = 6.0 Hz, 3H);  $^{13}\text{C}$  NMR (150 MHz,  $\text{CDCl}_3$ )  $\delta$  174.73, 174.68, 169.37, 169.07, 135.33, 135.30, 128.64, 128.62, 128.48, 128.42, 128.35, 76.48, 75.16, 66.85, 66.82, 40.29, 37.30, 29.69, 28.33, 26.06, 25.22, 21.26, 17.52, 15.98, 15.92; HRMS (ESI-TOF) Calcd for  $\text{C}_{15}\text{H}_{17}\text{O}_4$   $[\text{M}+\text{H}]^+$ : 261.1127; found: 261.1132.

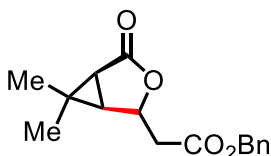

**Benzyl 2-(6,6-dimethyl-4-oxo-3-oxabicyclo[3.1.0]hexan-2-yl)acetate (3v)**

Following **General Procedure A** on 0.1 mmol scale. Purification by pTLC afforded the title compound (colorless oil, 26.0 mg, 95%, dr > 20.0/1.0).  $^1\text{H}$  NMR (600 MHz,  $\text{CDCl}_3$ )  $\delta$  7.46 – 7.29 (m, 5H), 5.17 (s, 2H), 4.64 (t,  $J$  = 6.5 Hz, 1H), 2.85 (dd,  $J$  = 16.0, 6.1 Hz, 1H), 2.72 (dd,  $J$  = 16.0, 6.9 Hz, 1H), 1.95 (d,  $J$  = 6.0 Hz, 1H), 1.90 (d,  $J$  = 6.1 Hz, 1H), 1.21 (s, 3H), 1.14 (s, 3H);  $^{13}\text{C}$  NMR (150 MHz,  $\text{CDCl}_3$ )  $\delta$  173.61, 169.15, 135.32, 128.62, 128.47, 128.40, 73.73, 66.84, 40.06, 34.63, 30.82, 25.24, 23.88, 14.85; HRMS (ESI-TOF) Calcd for  $\text{C}_{16}\text{H}_{19}\text{O}_4$   $[\text{M}+\text{H}]^+$ : 275.1278; found: 275.1277.

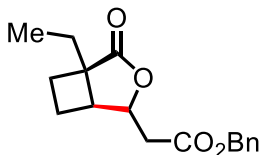

**Benzyl 2-(5-ethyl-4-oxo-3-oxabicyclo[3.2.0]heptan-2-yl)acetate (3w)**

Following **General Procedure A** on 0.1 mmol scale. Purification by pTLC afforded the title compound (colorless oil, 15.0 mg, 52%, dr = 1.1/1.0). Data for inseparable isomers:  $^1\text{H}$  NMR (600 MHz,  $\text{CDCl}_3$ )  $\delta$  7.41 – 7.30 (m, 10.5H), 5.15 (s, 4.2H), 4.86 – 4.79 (m, 1.1H), 4.78 (td,  $J$  = 7.1, 1.9 Hz, 1H), 3.01 – 2.94 (m, 1.1H), 2.93 (dd,  $J$  = 16.3, 7.2 Hz, 1.1H), 2.77 (dd,  $J$  = 16.0, 6.8 Hz, 1H), 2.63 (dd,  $J$  = 16.3, 6.9 Hz, 1H), 2.59 – 2.54 (m, 1H), 2.53 (dd,  $J$  = 16.0, 7.3 Hz, 1.1H), 2.36 – 2.24 (m, 2.1H), 2.19 – 2.05 (m, 2.1H), 2.05 – 1.86 (m, 4.2H), 1.86 – 1.74 (m, 2.1H), 1.76 – 1.64 (m, 2.1H), 0.95 (t,  $J$  = 7.3 Hz, 3H), 0.94 (t,  $J$  = 7.3 Hz, 3.3H);  $^{13}\text{C}$  NMR (150 MHz,  $\text{CDCl}_3$ )  $\delta$  181.43, 180.92, 169.57, 169.24, 135.37, 135.34, 128.63, 128.46, 128.34, 128.32, 80.75, 76.34, 66.81, 51.42, 49.20, 41.44, 41.41, 40.68, 35.36, 28.16, 27.72, 27.55, 27.18, 22.05, 15.74, 9.33, 9.22; HRMS (ESI-TOF) Calcd for  $\text{C}_{17}\text{H}_{21}\text{O}_4$   $[\text{M}+\text{H}]^+$ : 289.1440; found: 289.1442.

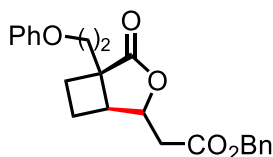

**Benzyl 2-(4-oxo-5-(2-phenoxyethyl)-3-oxabicyclo[3.2.0]heptan-2-yl)acetate (3x)**

Following **General Procedure A** on 0.1 mmol scale. Purification by pTLC afforded the title compound (colorless oil, 16.0 mg, 43%, dr = 1.6/1.0). Data for inseparable isomers:  $^1\text{H}$  NMR (600 MHz,  $\text{CDCl}_3$ )  $\delta$  7.41 – 7.29 (m, 13H), 7.28 – 7.21 (m, 5.2H), 6.98 – 6.89 (m, 2.6H), 6.88 – 6.81 (m, 5.2H), 5.17 – 5.05 (m, 5.2H), 4.90 – 4.83 (m, 1.6H), 4.83 – 4.77 (m, 1H), 4.09 (t,  $J$  = 5.9 Hz, 2H), 4.09 – 4.02 (m, 1.6H), 4.02 – 3.95 (m, 1.6H), 3.26 – 3.19 (m, 1.6H), 2.95 – 2.86 (m, 2.6H), 2.74 (dd,  $J$  = 16.2, 6.5 Hz, 1H), 2.63 (dd,  $J$  = 16.3, 7.4 Hz, 1.6H), 2.54 (dd,  $J$  = 16.2, 7.5 Hz, 1H), 2.47 – 2.32 (m, 2.6H), 2.32 – 2.13 (m, 7.8H), 2.11 – 1.92 (m, 5.2H);  $^{13}\text{C}$  NMR (150 MHz,  $\text{CDCl}_3$ )  $\delta$  181.15, 180.69, 169.37, 169.36, 158.19, 158.09, 135.37, 135.36, 129.53, 129.51, 128.60, 128.58, 128.42, 128.38, 128.27, 128.25, 121.06, 121.01, 114.26, 114.23, 81.41, 76.34, 66.73, 66.66, 64.26, 64.21, 49.01, 46.92, 42.05, 42.02, 40.16, 35.12, 33.92, 33.42, 29.29, 28.93, 22.42, 16.14; HRMS (ESI-TOF) Calcd for  $\text{C}_{23}\text{H}_{25}\text{O}_5$   $[\text{M}+\text{H}]^+$ : 381.1702; found: 381.1707.

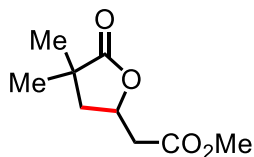

**Methyl 2-(4,4-dimethyl-5-oxotetrahydrofuran-2-yl)acetate (4a)**

Following **General Procedure A** on 0.1 mmol scale. Purification by column chromatography afforded the title compound (colorless oil, 17.0 mg, 92%).  $^1\text{H}$  NMR (500 MHz,  $\text{CDCl}_3$ )  $\delta$  4.84 (ddt,  $J = 9.9, 6.9, 6.1$  Hz, 1H), 3.72 (s, 3H), 2.83 (dd,  $J = 16.2, 7.0$  Hz, 1H), 2.62 (dd,  $J = 16.2, 6.2$  Hz, 1H), 2.30 (dd,  $J = 12.8, 6.0$  Hz, 1H), 1.83 (dd,  $J = 12.8, 9.9$  Hz, 1H), 1.29 (s, 3H), 1.29 (s, 3H);  $^{13}\text{C}$  NMR (125 MHz,  $\text{CDCl}_3$ )  $\delta$  181.14, 170.01, 72.60, 52.00, 43.09, 40.33, 40.04, 24.95, 24.39; HRMS (ESI-TOF) Calcd for  $\text{C}_9\text{H}_{15}\text{O}_4$   $[\text{M}+\text{H}]^+$ : 187.0965; found: 187.0962.

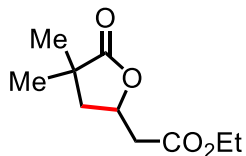

**Ethyl 2-(4,4-dimethyl-5-oxotetrahydrofuran-2-yl)acetate (4b)**

Following **General Procedure A** on 0.1 mmol scale. Purification by column chromatography afforded the title compound (colorless oil, 18.0 mg, 90%).  $^1\text{H}$  NMR (600 MHz,  $\text{CDCl}_3$ )  $\delta$  4.84 (dq,  $J = 9.9, 6.4$  Hz, 1H), 4.24 – 4.10 (m, 2H), 2.82 (dd,  $J = 16.2, 6.9$  Hz, 1H), 2.60 (dd,  $J = 16.2, 6.2$  Hz, 1H), 2.30 (dd,  $J = 12.8, 6.0$  Hz, 1H), 1.83 (dd,  $J = 12.8, 9.9$  Hz, 1H), 1.35 – 1.21 (m, 9H);  $^{13}\text{C}$  NMR (150 MHz,  $\text{CDCl}_3$ )  $\delta$  181.21, 169.57, 72.68, 60.99, 43.07, 40.31, 40.28, 24.94, 24.39, 14.13; HRMS (ESI-TOF) Calcd for  $\text{C}_{10}\text{H}_{17}\text{O}_4$   $[\text{M}+\text{H}]^+$ : 201.1121; found: 201.1120.

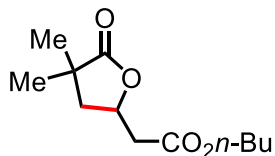

**Butyl 2-(4,4-dimethyl-5-oxotetrahydrofuran-2-yl)acetate (4c)**

Following **General Procedure A** on 0.1 mmol scale. Purification by column chromatography afforded the title compound (colorless oil, 21.0 mg, 91%).  $^1\text{H}$  NMR (600



MHz, CDCl<sub>3</sub>)  $\delta$  4.83 (dq,  $J$  = 9.9, 6.3 Hz, 1H), 4.12 (tt,  $J$  = 7.0, 3.5 Hz, 2H), 2.82 (dd,  $J$  = 16.2, 6.9 Hz, 1H), 2.60 (dd,  $J$  = 16.1, 6.3 Hz, 1H), 2.30 (dd,  $J$  = 12.8, 6.0 Hz, 1H), 1.83 (dd,  $J$  = 12.8, 9.9 Hz, 1H), 1.67 – 1.58 (m, 2H), 1.43 – 1.35 (m, 2H), 1.29 (s, 3H), 1.29 (s, 3H), 0.94 (t,  $J$  = 7.4 Hz, 3H); <sup>13</sup>C NMR (151 MHz, CDCl<sub>3</sub>)  $\delta$  181.20, 169.66, 72.68, 64.90, 43.09, 40.31, 40.26, 30.52, 24.95, 24.38, 19.06, 13.65; HRMS (ESI-TOF) Calcd for C<sub>12</sub>H<sub>21</sub>O<sub>4</sub> [M+H]<sup>+</sup>: 229.1434; found: 229.1438.

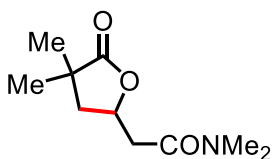

#### 2-(4,4-Dimethyl-5-oxotetrahydrofuran-2-yl)-N,N-dimethylacetamide (4d)

Following **General Procedure A** on 0.1 mmol scale. Purification by column chromatography afforded the title compound (colorless oil, 19.0 mg, 95%). <sup>1</sup>H NMR (600 MHz, CDCl<sub>3</sub>)  $\delta$  4.92 (ddt,  $J$  = 10.0, 7.1, 5.8 Hz, 1H), 3.03 (s, 3H), 3.00 – 2.93 (m, 4H), 2.52 (dd,  $J$  = 15.8, 7.1 Hz, 1H), 2.44 (dd,  $J$  = 12.9, 5.9 Hz, 1H), 1.80 (dd,  $J$  = 12.9, 9.9 Hz, 1H), 1.28 (s, 3H), 1.28 (s, 3H); <sup>13</sup>C NMR (150 MHz, CDCl<sub>3</sub>)  $\delta$  181.53, 168.89, 74.02, 43.90, 40.28, 39.15, 37.30, 35.25, 24.96, 24.33; HRMS (ESI-TOF) Calcd for C<sub>10</sub>H<sub>18</sub>NO<sub>3</sub> [M+H]<sup>+</sup>: 200.1287; found: 200.1292.

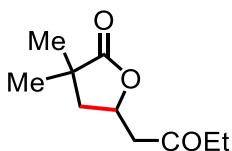

#### 3,3-Dimethyl-5-(2-oxobutyl)dihydrofuran-2(3H)-one (4e)

Following **General Procedure A** on 0.1 mmol scale. Purification by column chromatography afforded the title compound (colorless oil, 17.0 mg, 94%). <sup>1</sup>H NMR (400 MHz, CDCl<sub>3</sub>)  $\delta$  4.92 – 4.80 (m, 1H), 2.98 (dd,  $J$  = 16.9, 6.6 Hz, 1H), 2.64 (dd,  $J$  = 16.9, 6.1 Hz, 1H), 2.49 (qd,  $J$  = 7.3, 4.5 Hz, 2H), 2.32 (dd,  $J$  = 12.8, 5.9 Hz, 1H), 1.74 (dd,  $J$  = 12.8, 10.1 Hz, 1H), 1.28 (s, 6H), 1.07 (t,  $J$  = 7.3 Hz, 3H); <sup>13</sup>C NMR (125 MHz, CDCl<sub>3</sub>)  $\delta$  207.67, 181.34, 72.64, 47.60, 43.53, 40.24, 36.89, 24.95, 24.30, 7.46; HRMS (ESI-TOF) Calcd for C<sub>10</sub>H<sub>17</sub>O<sub>3</sub> [M+H]<sup>+</sup>: 185.1172; found: 185.1176.

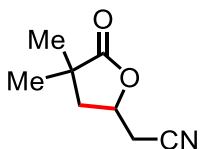

#### 2-(4,4-Dimethyl-5-oxotetrahydrofuran-2-yl)acetonitrile (4f)

Following **General Procedure A** on 0.1 mmol scale. Purification by column chromatography afforded the title compound (colorless oil, 12.0 mg, 78%).  $^1\text{H}$  NMR (500 MHz,  $\text{CDCl}_3$ )  $\delta$  4.72 – 4.60 (m, 1H), 2.87 – 2.75 (m, 2H), 2.34 (dd,  $J$  = 12.9, 6.1 Hz, 1H), 1.98 (dd,  $J$  = 12.9, 9.8 Hz, 1H), 1.34 (s, 3H), 1.31 (s, 3H);  $^{13}\text{C}$  NMR (125 MHz,  $\text{CDCl}_3$ )  $\delta$  180.07, 115.20, 70.83, 42.24, 40.47, 24.80, 24.45, 23.99; HRMS (ESI-TOF) Calcd for  $\text{C}_8\text{H}_{12}\text{NO}_2$   $[\text{M}+\text{H}]^+$ : 154.0863; found: 154.0863.

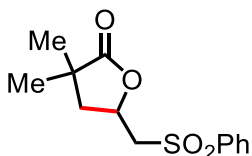

#### 3,3-Dimethyl-5-((phenylsulfonyl)methyl)dihydrofuran-2(3H)-one (4g)

Following **General Procedure A** on 0.1 mmol scale. Purification by column chromatography afforded the title compound (colorless oil, 24.0 mg, 90%).  $^1\text{H}$  NMR (500 MHz,  $\text{CDCl}_3$ )  $\delta$  7.99 – 7.90 (m, 2H), 7.76 – 7.65 (m, 1H), 7.65 – 7.54 (m, 2H), 4.89 (dq,  $J$  = 10.0, 6.1 Hz, 1H), 3.62 (dd,  $J$  = 14.3, 6.1 Hz, 1H), 3.34 (dd,  $J$  = 14.4, 6.2 Hz, 1H), 2.40 (dd,  $J$  = 13.0, 6.1 Hz, 1H), 1.94 (dd,  $J$  = 13.0, 10.0 Hz, 1H), 1.26 (s, 6H);  $^{13}\text{C}$  NMR (125 MHz,  $\text{CDCl}_3$ )  $\delta$  180.16, 139.24, 134.28, 129.45, 128.05, 70.36, 60.82, 43.25, 39.78, 24.73, 24.11; HRMS (ESI-TOF) Calcd for  $\text{C}_{13}\text{H}_{17}\text{O}_4\text{S}$   $[\text{M}+\text{H}]^+$ : 269.0842; found: 269.0842.

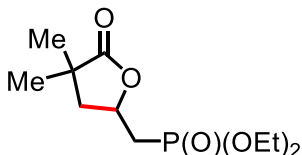

#### Diethyl ((4,4-dimethyl-5-oxotetrahydrofuran-2-yl)methyl)phosphonate (4h)

Following **General Procedure A** on 0.1 mmol scale. Purification by column chromatography afforded the title compound (colorless oil, 23.0 mg, 88%).  $^1\text{H}$  NMR (600 MHz,  $\text{CDCl}_3$ )  $\delta$  4.81 – 4.67 (m, 1H), 4.21 – 4.07 (m, 4H), 2.44 – 2.39 (m, 1H), 2.39 – 2.32 (m, 1H), 2.12 – 2.00 (m, 1H), 1.90 (dd,  $J$  = 13.0, 10.0 Hz, 1H), 1.39 – 1.31 (m, 6H), 1.29 (s,

3H), 1.27 (s, 3H);  $^{13}\text{C}$  NMR (150 MHz,  $\text{CDCl}_3$ )  $\delta$  181.05, 71.89, 62.18 (d,  $J = 6.5$  Hz), 61.95 (d,  $J = 6.4$  Hz), 44.39 (d,  $J = 5.8$  Hz), 40.44, 32.59 (d,  $J = 139.8$  Hz), 24.88, 24.19, 16.40 (d,  $J = 6.1$  Hz), 16.39 (d,  $J = 6.1$  Hz); HRMS (ESI-TOF) Calcd for  $\text{C}_{11}\text{H}_{22}\text{O}_5\text{P}$   $[\text{M}+\text{H}]^+$ : 265.1199; found: 265.1197.

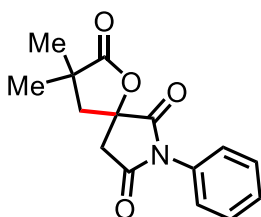

### 3,3-Dimethyl-7-phenyl-1-oxa-7-azaspiro[4.4]nonane-2,6,8-trione (4i)

Following **General Procedure A** on 0.1 mmol scale with the following modification:  $\text{Pd}(\text{OAc})_2$  (10 mol%) without  $\text{Na}_2\text{HPO}_4 \cdot 7\text{H}_2\text{O}$ . Purification by column chromatography afforded the title compound (colorless oil, 27.0 mg, 99%).  $^1\text{H}$  NMR (600 MHz,  $\text{CDCl}_3$ )  $\delta$  7.55 – 7.48 (m, 2H), 7.47 – 7.41 (m, 1H), 7.35 – 7.29 (m, 2H), 3.33 (d,  $J = 18.4$  Hz, 1H), 3.08 (d,  $J = 18.5$  Hz, 1H), 2.79 (d,  $J = 13.5$  Hz, 1H), 2.24 (d,  $J = 13.5$  Hz, 1H), 1.51 (s, 3H), 1.41 (s, 3H);  $^{13}\text{C}$  NMR (150 MHz,  $\text{CDCl}_3$ )  $\delta$  179.80, 174.16, 171.27, 131.04, 129.31, 129.15, 126.14, 78.69, 44.86, 42.87, 40.40, 27.01, 25.78; HRMS (ESI-TOF) Calcd for  $\text{C}_{15}\text{H}_{16}\text{NO}_4$   $[\text{M}+\text{H}]^+$ : 274.1074; found: 274.1071.

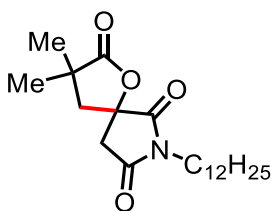

### 7-Dodecyl-3,3-dimethyl-1-oxa-7-azaspiro[4.4]nonane-2,6,8-trione (4j)

Following **General Procedure A** on 0.1 mmol scale with the following modification:  $\text{Pd}(\text{OAc})_2$  (10 mol%) without  $\text{Na}_2\text{HPO}_4 \cdot 7\text{H}_2\text{O}$ . Purification by column chromatography afforded the title compound (colorless oil, 26.0 mg, 71%).  $^1\text{H}$  NMR (600 MHz,  $\text{CDCl}_3$ )  $\delta$  3.60 – 3.48 (m, 2H), 3.14 (d,  $J = 18.3$  Hz, 1H), 2.89 (d,  $J = 18.3$  Hz, 1H), 2.66 (d,  $J = 13.4$  Hz, 1H), 2.13 (d,  $J = 13.4$  Hz, 1H), 1.64 – 1.53 (m, 2H), 1.48 (s, 3H), 1.37 (s, 3H), 1.35 – 1.20 (m, 18H), 0.88 (t,  $J = 7.0$  Hz, 3H);  $^{13}\text{C}$  NMR (150 MHz,  $\text{CDCl}_3$ )  $\delta$  179.89, 175.06, 172.27, 78.64, 44.74, 42.77, 40.33, 39.50, 31.88, 29.58, 29.50, 29.39, 29.31, 29.03, 27.48,

26.85, 26.68, 25.72, 22.65, 14.09; HRMS (ESI-TOF) Calcd for C<sub>21</sub>H<sub>36</sub>NO<sub>4</sub> [M+H]<sup>+</sup>: 366.2644; found: 366.2647.

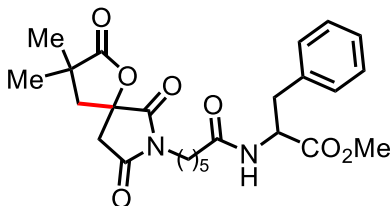

**Methyl (6-(3,3-dimethyl-2,6,8-trioxo-1-oxa-7-azaspiro[4.4]nonan-7-yl)hexanoyl)phenylalaninate (4k)**

Following **General Procedure A** on 0.1 mmol scale with the following modification: Pd(OAc)<sub>2</sub> (10 mol%) without Na<sub>2</sub>HPO<sub>4</sub>·7H<sub>2</sub>O. Purification by column chromatography afforded the title compound (colorless oil, 25.0 mg, 53%, dr = 1.0/1.0). <sup>1</sup>H NMR (600 MHz, CDCl<sub>3</sub>) δ 7.32 – 7.27 (m, 2H), 7.27 – 7.20 (m, 1H), 7.12 – 7.05 (m, 2H), 5.87 (d, *J* = 7.9 Hz, 1H), 4.91 – 4.84 (m, 1H), 3.73 (s, 3H), 3.53 (td, *J* = 7.1, 6.2, 3.3 Hz, 2H), 3.19 – 3.11 (m, 2H), 3.10 – 3.04 (m, 1H), 2.90 (dd, *J* = 18.3, 2.0 Hz, 1H), 2.66 (d, *J* = 13.4 Hz, 1H), 2.20 – 2.10 (m, 3H), 1.65 – 1.52 (m, 4H), 1.48 (s, 3H), 1.36 (s, 3H), 1.33 – 1.21 (m, 2H); <sup>13</sup>C NMR (150 MHz, CDCl<sub>3</sub>) δ 179.88, 175.05, 172.30, 172.26, 172.09, 172.08, 172.06, 172.04, 135.82, 129.72, 129.18, 129.10, 128.56, 127.11, 126.54, 78.66, 52.91, 52.90, 52.30, 44.66, 44.65, 42.74, 42.73, 40.30, 39.13, 37.86, 37.84, 36.00, 27.09, 26.84, 26.08, 26.05, 25.71, 24.76; HRMS (ESI-TOF) Calcd for C<sub>25</sub>H<sub>32</sub>N<sub>2</sub>O<sub>7</sub> [M+H]<sup>+</sup>: 473.2288; found: 473.2289.

## Gram-Scale Experiment and Synthetic Application

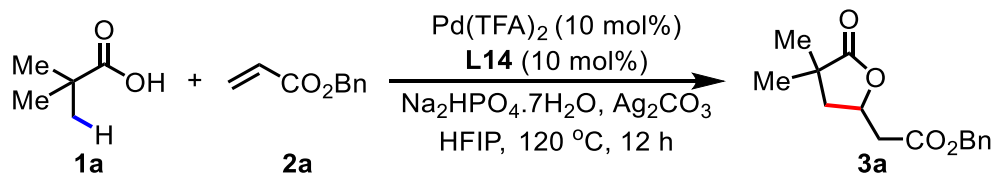

In the sealed tube,  $\text{Pd(TFA)}_2$  (10 mol%, 0.40 g), ligand **L14** (10 mol%, 0.23 g),  $\text{Na}_2\text{HPO}_4 \cdot 7\text{H}_2\text{O}$  (1.0 eq, 3.22 g),  $\text{Ag}_2\text{CO}_3$  (1.0 eq, 3.30 g), and pivalic acid **1a** (12.0 mmol, 1.22 g) in order were weighed in air and placed with a magnetic stir bar. Then HFIP (24.0 mL) and benzyl acrylate **2a** (2.0 eq, 3.60 mL) was added. The reaction mixture was stirred at rt for 10 min, and then heated to 120 °C for 12 h (300 rpm). After being allowed to cool to room temperature, the mixture was diluted with DCM, and filtered through a pad of celite. The filtrate was concentrated *in vacuo*, and the resulting mixture purified by column chromatography to afford **3a** (2.92 g, 93%).

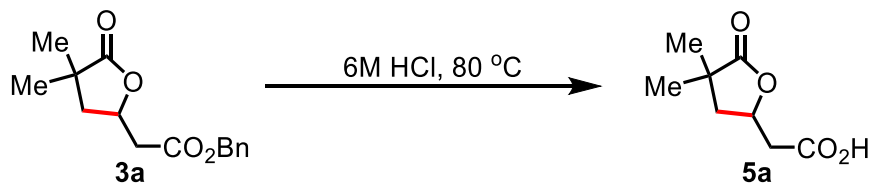

To a solution of 6M HCl (2 mL) was added **3a** (0.2 mmol) then the mixture was heated to 80 °C until TLC showed that the **3a** was fully consumed. The reaction mixture was cooled down to room temperature, then extracted with DCM. The organic phase was dried with anhydrous  $\text{Na}_2\text{SO}_4$ , and the solvent was removed under vacuum. The residue was purified by column chromatography to afford **5a** (31.6 mg, 92%).

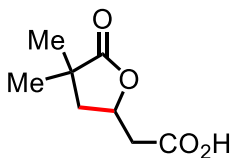

### 2-(4,4-Dimethyl-5-oxotetrahydrofuran-2-yl)acetic acid (**5a**)

$^1\text{H}$  NMR (600 MHz,  $\text{CDCl}_3$ )  $\delta$  8.67 (br s, 1H), 4.82 (ddt,  $J = 10.0, 7.2, 5.9$  Hz, 1H), 2.84 (ddd,  $J = 16.6, 7.2, 1.4$  Hz, 1H), 2.68 (dd,  $J = 16.6, 5.8$  Hz, 1H), 2.31 (dd,  $J = 12.8, 6.0$  Hz, 1H), 1.84 (dd,  $J = 12.8, 10.0$  Hz, 1H), 1.28 (s, 3H), 1.27 (s, 3H);  $^{13}\text{C}$  NMR (150 MHz,  $\text{CDCl}_3$ )  $\delta$

181.39, 175.00, 72.41, 42.87, 40.33, 39.88, 24.84, 24.32; HRMS (ESI-TOF) Calcd for  $C_8H_{12}O_4$   $[M+H]^+$ : 173.0808; found: 173.0807.

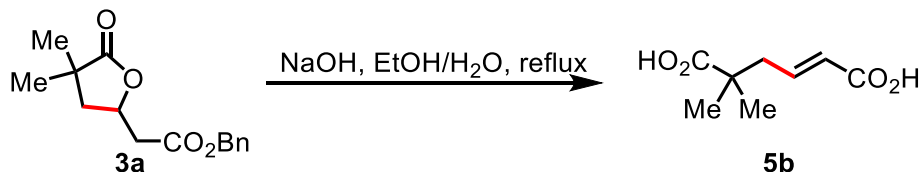

To a solution of **3a** (1.0 mmol) in EtOH/H<sub>2</sub>O (5.0/5.0 mL) was added NaOH (4.0 eq), then the mixture was heated to reflux until TLC showed that the **3a** was fully consumed. The reaction mixture was cooled down to room temperature, and 1M HCl was added until the pH value to about 3, followed by filtration through a pad of celite, and the solvent was removed under vacuum. The residue was purified by column chromatography to afford **5b** (135 mg, 78%).

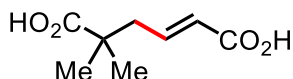

**(E)-5,5-Dimethylhex-2-enedioic acid (5b)**

<sup>1</sup>H NMR (500 MHz, CDCl<sub>3</sub>)  $\delta$  7.04 (dt,  $J$  = 15.5, 7.7 Hz, 1H), 5.88 (dt,  $J$  = 15.5, 1.4 Hz, 1H), 2.48 (dd,  $J$  = 7.7, 1.4 Hz, 2H), 1.26 (s, 6H); <sup>13</sup>C NMR (125 MHz, CDCl<sub>3</sub>)  $\delta$  183.39, 171.57, 147.38, 123.70, 42.51, 42.24, 25.07; HRMS (ESI-TOF) Calcd for  $C_8H_{12}O_4$   $[M+H]^+$ : 173.0808; found: 173.0807.

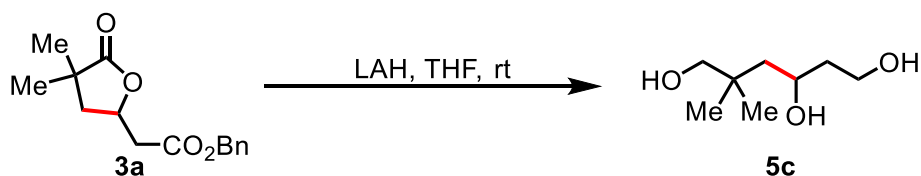

To a solution of **3a** (0.2 mmol) in THF (2.0 mL) was added 0.4 mL of LAH solution (1.0 M in THF), then the mixture was stirred at room temperature until TLC showed that the **3a** was fully consumed (around 1h). The reaction mixture was added Na<sub>2</sub>SO<sub>4</sub>·10H<sub>2</sub>O (10 mg) followed by water (2 mL), then extracted with DCM. The organic phase was dried with anhydrous Na<sub>2</sub>SO<sub>4</sub>, and the solvent was removed under vacuum. The residue was purified by column chromatography to afford **5c** (27.0 mg, 83%).

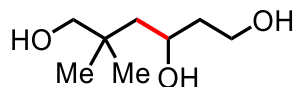

**5,5-Dimethylhexane-1,3,6-triol (5c)**

$^1\text{H}$  NMR (600 MHz,  $\text{CDCl}_3$ )  $\delta$  4.09 – 4.01 (m, 1H), 3.95 – 3.88 (m, 1H), 3.90 – 3.82 (m, 1H), 3.42 (d,  $J = 11.0$  Hz, 1H), 3.37 (d,  $J = 11.0$  Hz, 1H), 1.79 – 1.68 (m, 1H), 1.66 – 1.58 (m, 2H), 1.31 (d,  $J = 14.8$  Hz, 1H), 0.97 (s, 3H), 0.90 (s, 3H);  $^{13}\text{C}$  NMR (150 MHz,  $\text{CDCl}_3$ )  $\delta$  71.54, 69.03, 62.12, 48.93, 39.28, 35.08, 28.19, 22.90; HRMS (ESI-TOF) Calcd for  $\text{C}_8\text{H}_{18}\text{O}_3$   $[\text{M}+\text{H}]^+$ : 163.1329; found: 163.1333.

## Kinetic Experiments

Kinetic data with **L14**

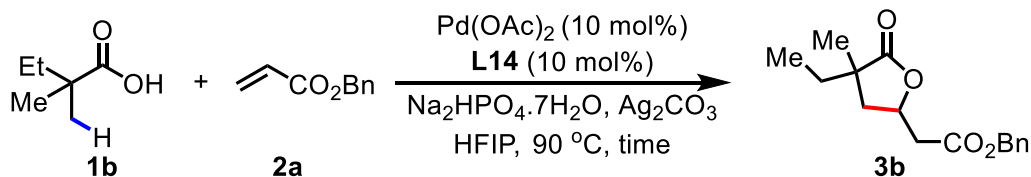

**General Procedure:** In the control tube,  $\text{Pd}(\text{OAc})_2$  (10 mol%), ligand **L14** (10 mol%),  $\text{Na}_2\text{HPO}_4 \cdot 7\text{H}_2\text{O}$  (1.0 eq), and  $\text{Ag}_2\text{CO}_3$  (1.0 eq) in order were weighed in air and placed with a magnetic stir bar. Then HFIP (1.0 mL), **1b** (0.1 mmol), and **2a** (2.0 eq) were added. The reaction mixture was stirred at rt for 10 min, and then heated to 90 °C for the appropriate time (300 rpm). After being allowed to cool in a dry ice bath, the mixture was diluted with DCM, and filtered through a pad of celite. The filtrate was concentrated *in vacuo*, and the yield was determined by  $^1\text{H}$  NMR analysis of the crude product using  $\text{CH}_2\text{Br}_2$  as the internal standard. The obtained average yields for three trials were plotted as concentration [**3b**] vs. time *t* (Figure S1). Kinetic data under the standard conditions are shown below:

| <b>3b</b> ( $10^{-3}$ M) |        |         |         |         |         |           |
|--------------------------|--------|---------|---------|---------|---------|-----------|
| entry                    | t(min) | trial 1 | trial 2 | trial 3 | average | std. dev. |
| 1                        | 0      | 0.0     | 0.0     | 0.0     | 0.0     | 0.0       |
| 2                        | 10     | 16.0    | 20.6    | 21.0    | 19.2    | 2.8       |
| 3                        | 20     | 20.2    | 22.4    | 25.0    | 22.5    | 2.4       |
| 4                        | 30     | 31.8    | 37.4    | 39.4    | 36.2    | 3.9       |
| 5                        | 40     | 39.4    | 38.4    | 42.6    | 40.1    | 2.2       |
| 6                        | 50     | 42.4    | 42.4    | 44.2    | 43.0    | 1.0       |
| 7                        | 60     | 44.6    | 44.4    | 47.0    | 45.3    | 1.4       |



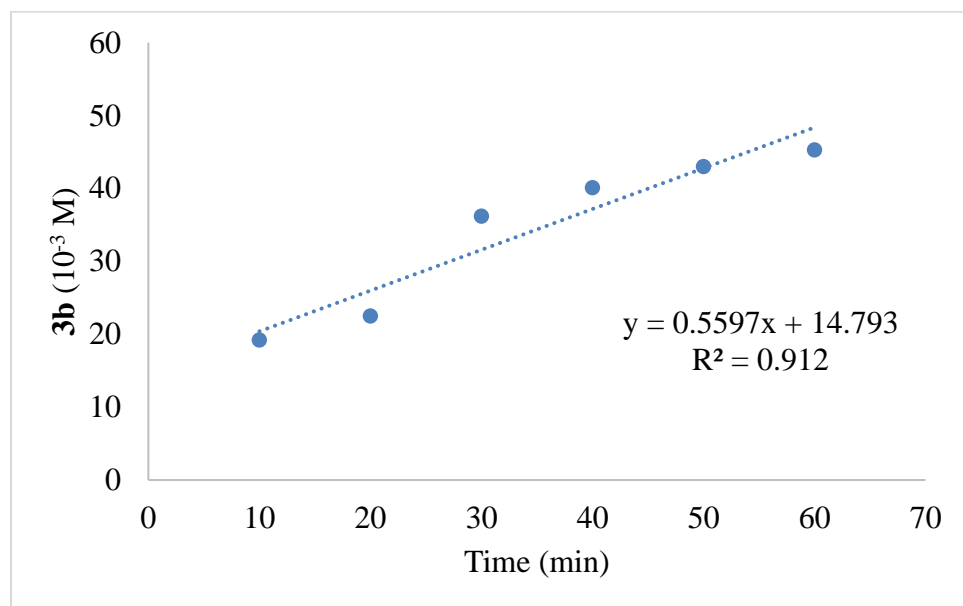

**Figure S1.** Representative initial data for  $\beta$ -C(sp<sup>3</sup>)-H olefination of **1b** with **L14**

Kinetic data in the absence of **L14**

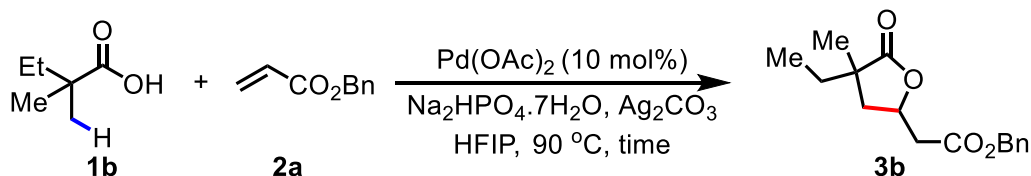

**General Procedure:** In the control tube,  $\text{Pd}(\text{OAc})_2$  (10 mol%),  $\text{Na}_2\text{HPO}_4 \cdot 7\text{H}_2\text{O}$  (1.0 eq), and  $\text{Ag}_2\text{CO}_3$  (1.0 eq) in order were weighed in air and placed with a magnetic stir bar. Then HFIP (1.0 mL), **1b** (0.1 mmol), and **2a** (2.0 eq) were added. The reaction mixture was stirred at rt for 10 min, and then heated to 90 °C for the appropriate time (300 rpm). After being allowed to cool in a dry ice bath, the mixture was diluted with DCM, and filtered through a pad of celite. The filtrate was concentrated *in vacuo*, and the yield was determined by  $^1\text{H}$  NMR analysis of the crude product using  $\text{CH}_2\text{Br}_2$  as the internal standard. The obtained average yields for three trials were plotted as concentration [**3b**] vs. time *t* (Figure S2). Kinetic data under the standard conditions are shown below:

| <b>3b</b> ( $10^{-3}$ M) |        |         |         |         |         |           |
|--------------------------|--------|---------|---------|---------|---------|-----------|
| entry                    | t(min) | trial 1 | trial 2 | trial 3 | average | std. dev. |
| 1                        | 0      | 0.0     | 0.0     | 0.0     | 0.0     | 0.0       |
| 2                        | 60     | 9.8     | 8.8     | 8.4     | 9.0     | 0.7       |
| 3                        | 120    | 10.4    | 10.2    | 9.6     | 10.1    | 0.4       |
| 4                        | 180    | 11.0    | 10.8    | 11.4    | 11.1    | 0.3       |
| 5                        | 240    | 11.4    | 11.4    | 12.0    | 11.6    | 0.3       |
| 6                        | 300    | 13.2    | 13.8    | 16.8    | 14.6    | 1.9       |
| 7                        | 360    | 19.6    | 15.8    | 18.4    | 17.9    | 1.9       |

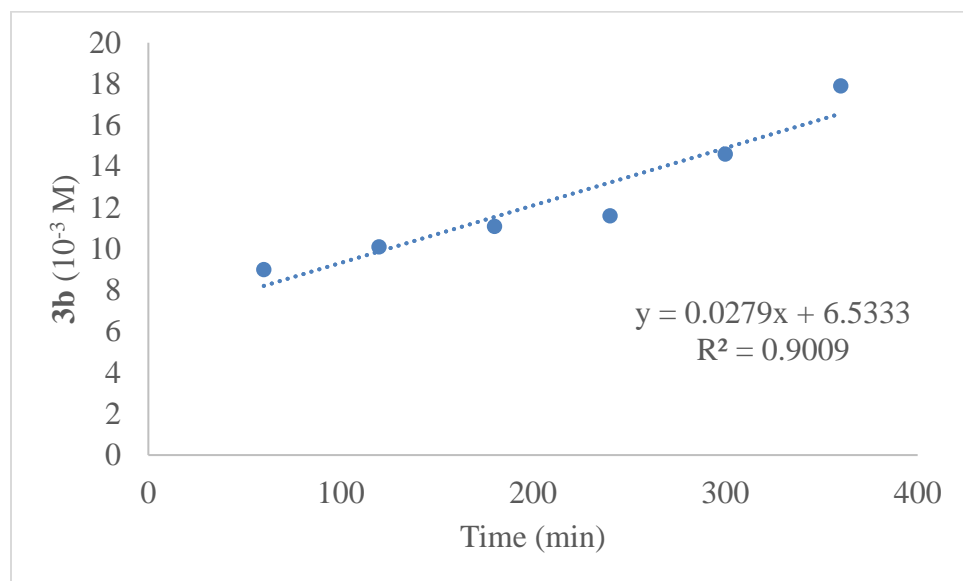

**Figure S2.** Representative data for  $\beta$ -C(sp<sup>3</sup>)-H olefination of **1b** in the absence of **L14**

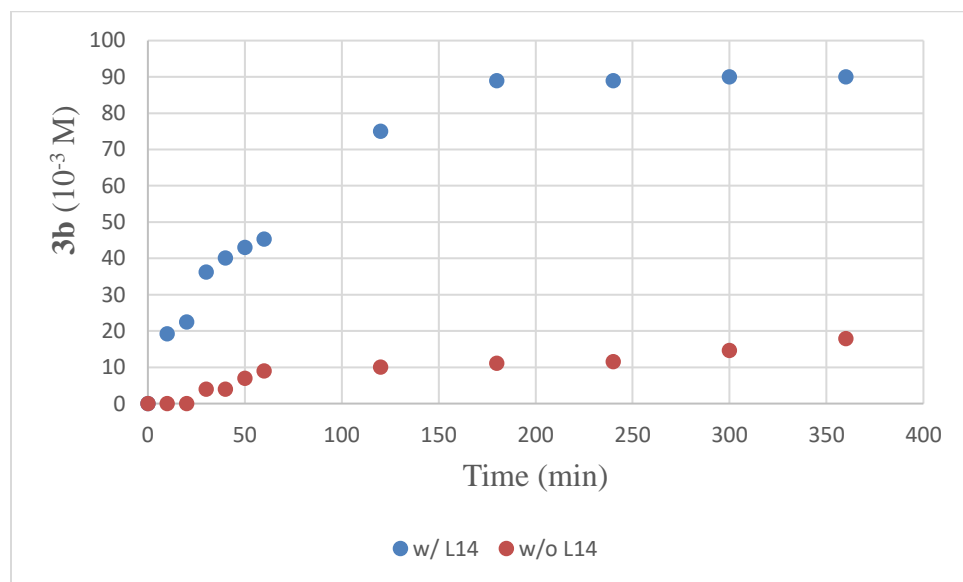

**Figure S3.** Representative data for  $\beta$ -C(sp<sup>3</sup>)-H olefination of **1b**

**Reference:**

1. Katritzky, A. R.; Xu, Y. J.; He, H. Y.; Mehta, S. *J. Org. Chem.* **2001**, *66*, 5590.
2. Adams, H.; Anderson, J. C.; Cubbon, R.; James, D. S.; Mathias, J. P. *J. Org. Chem.* **1999**, *64*, 8256.

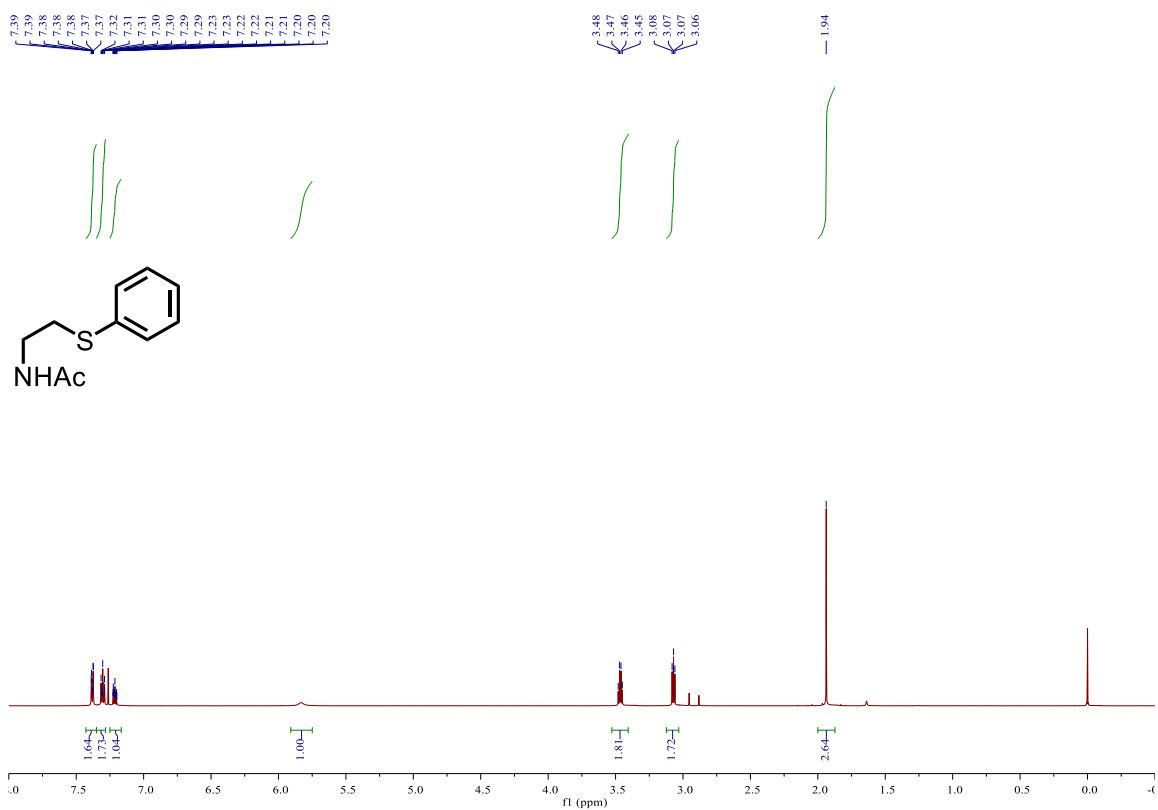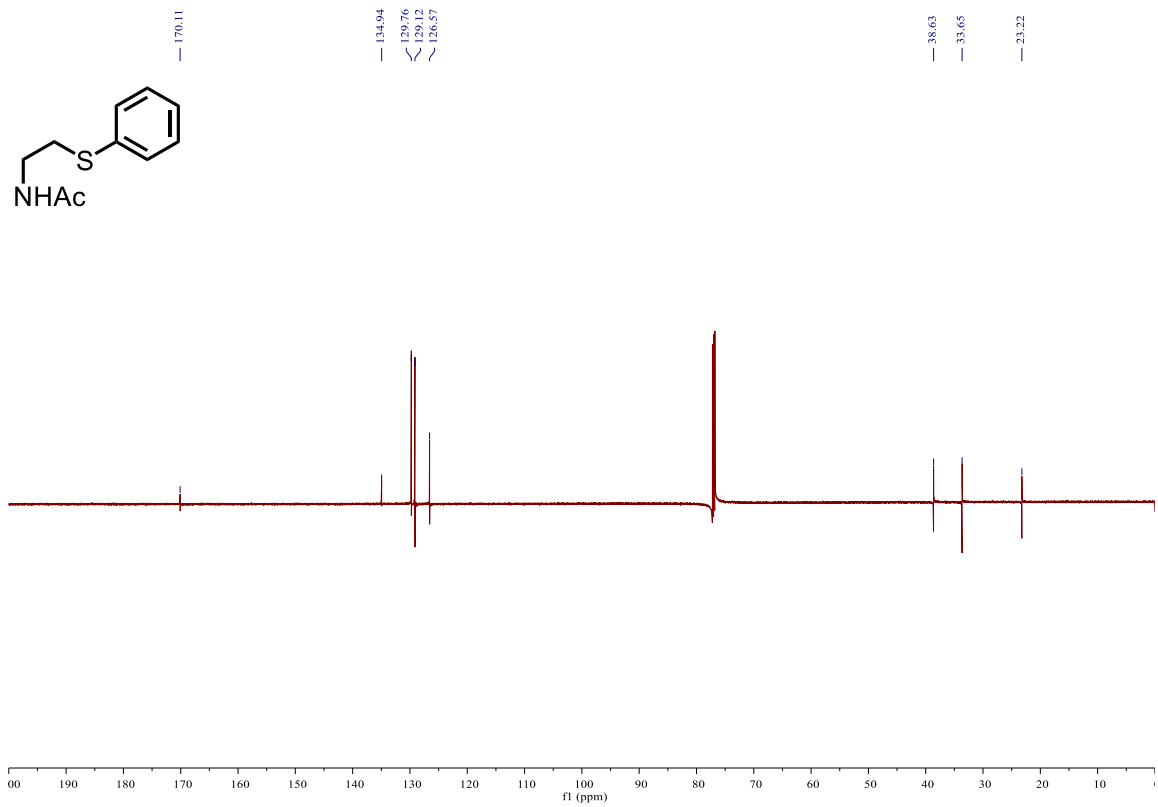

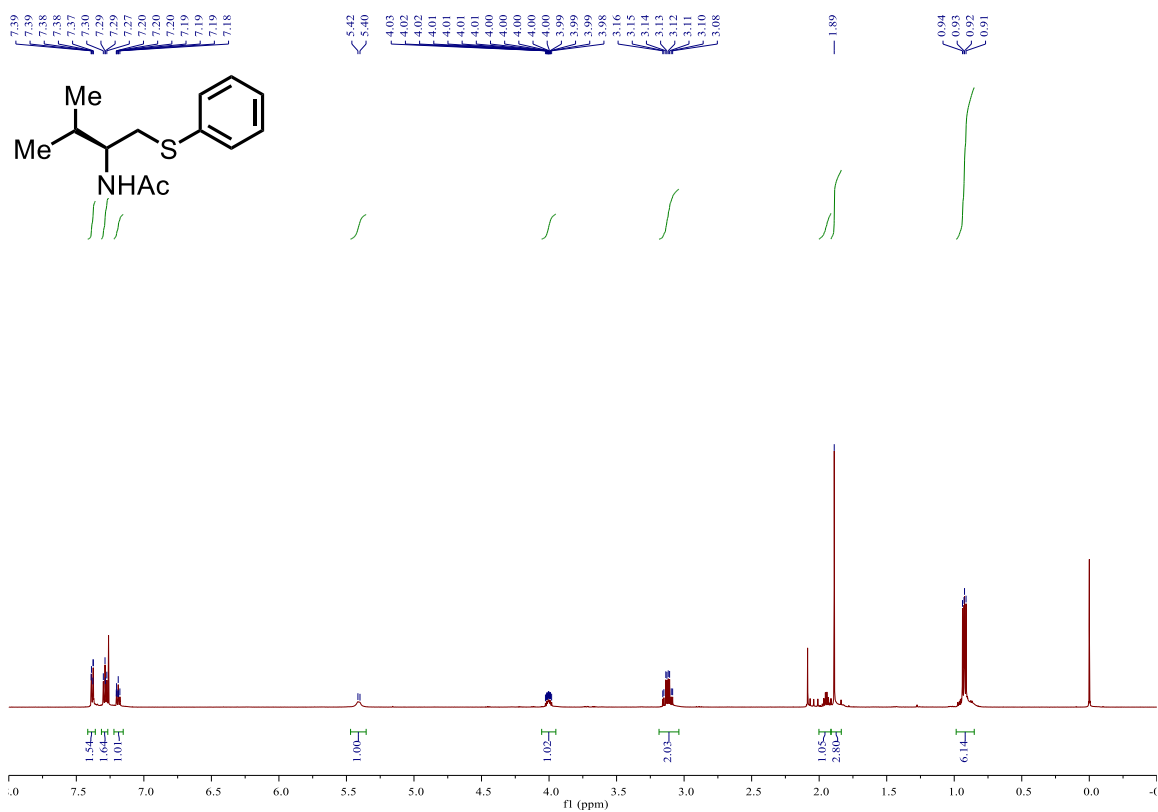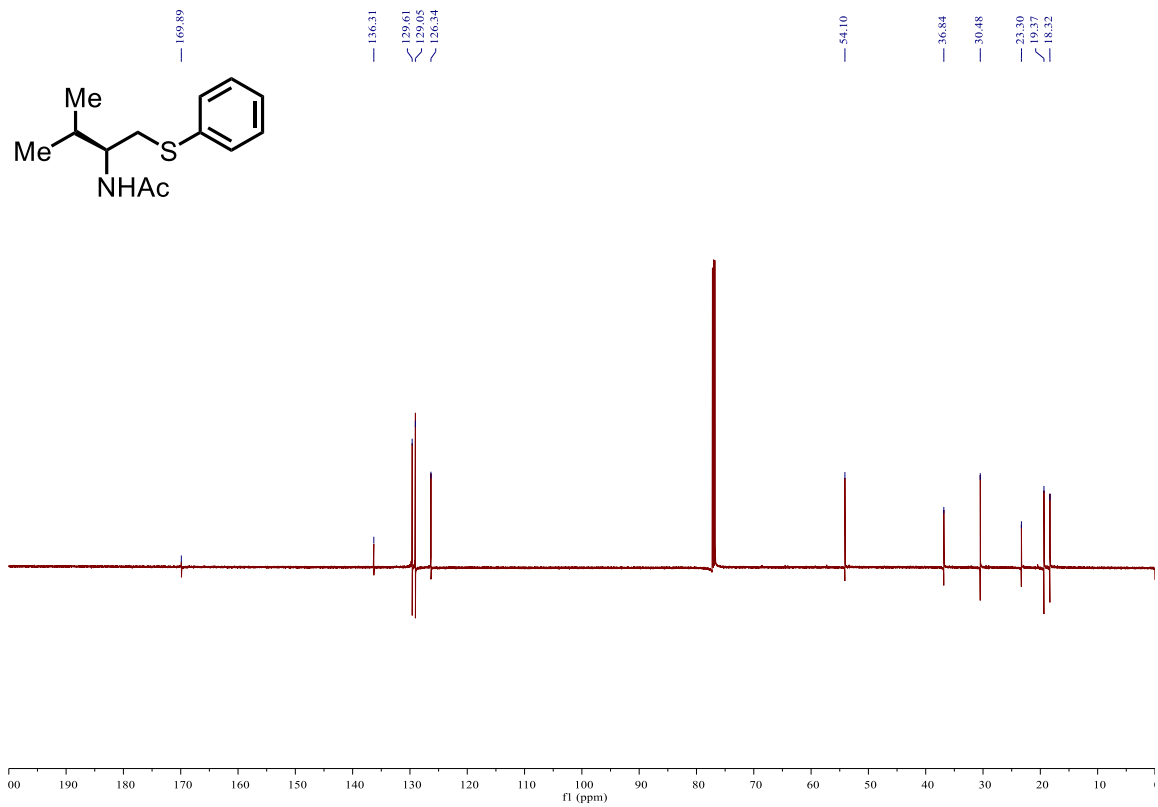

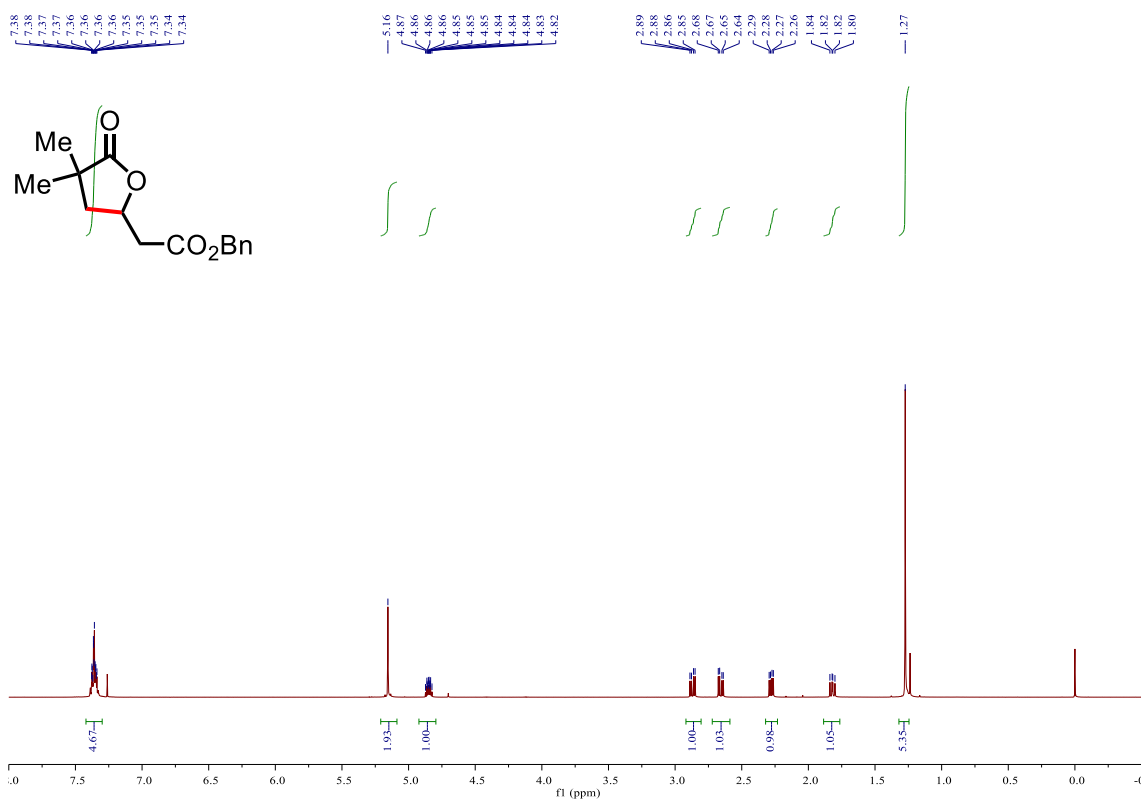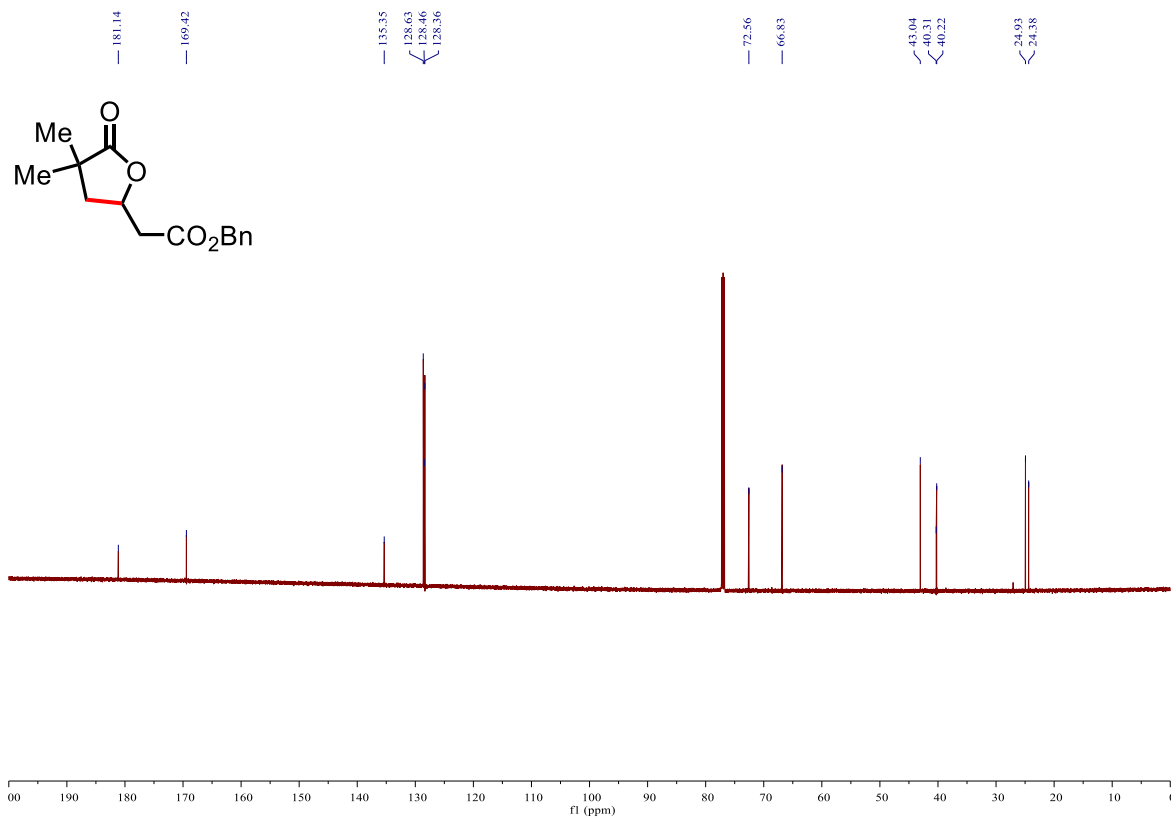

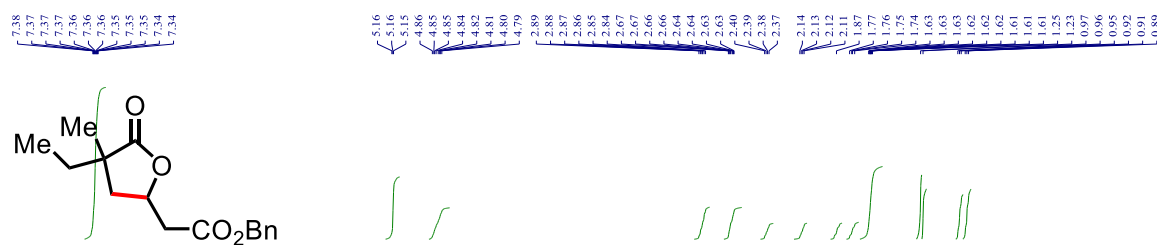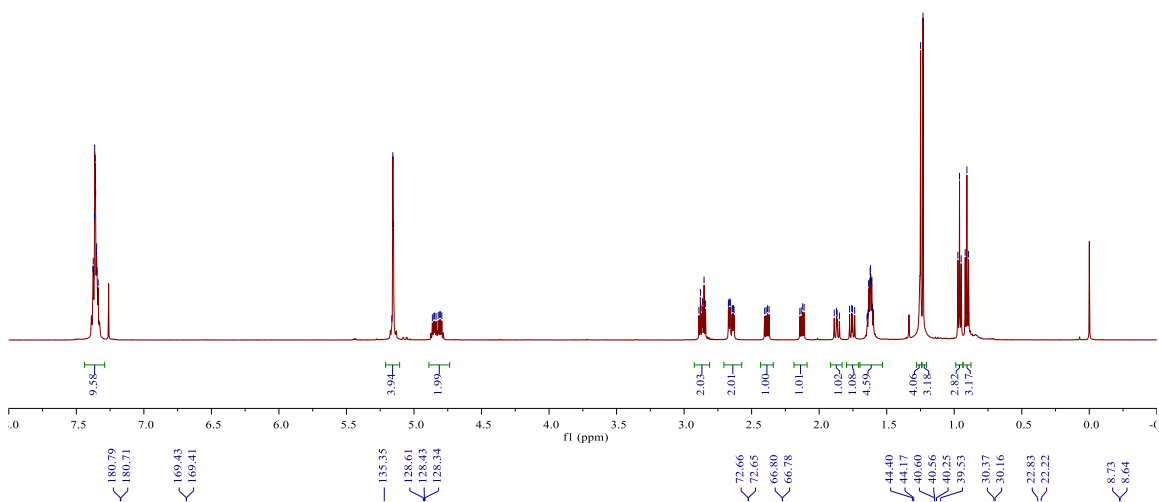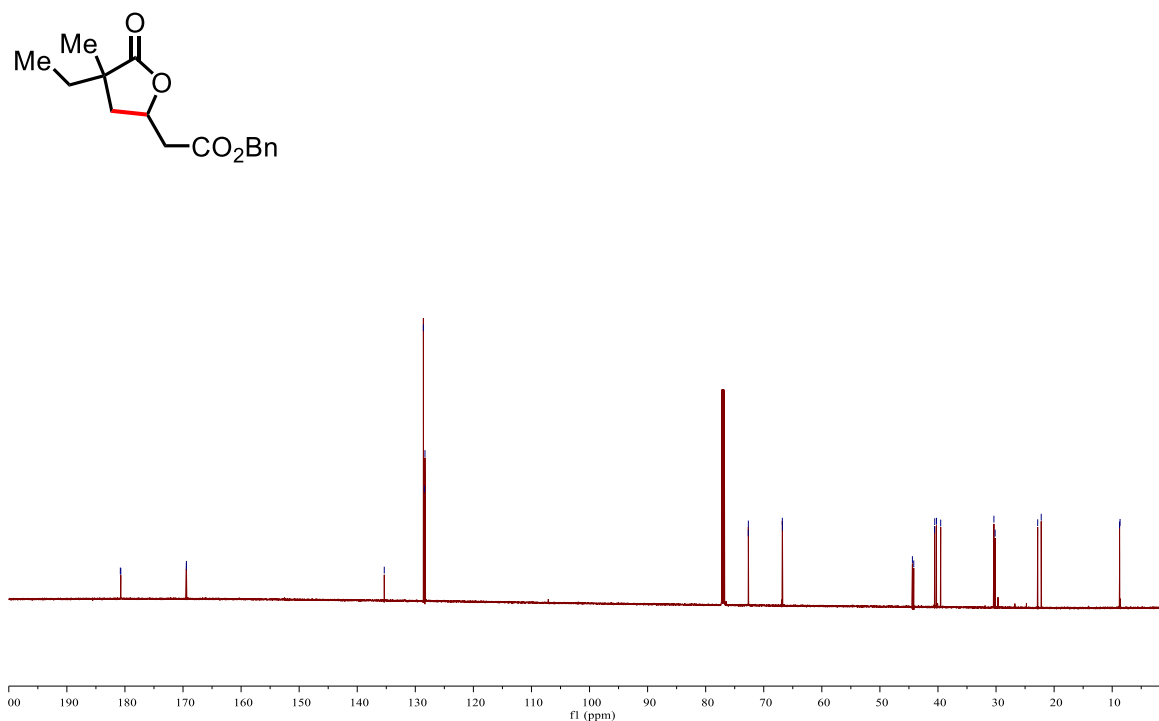



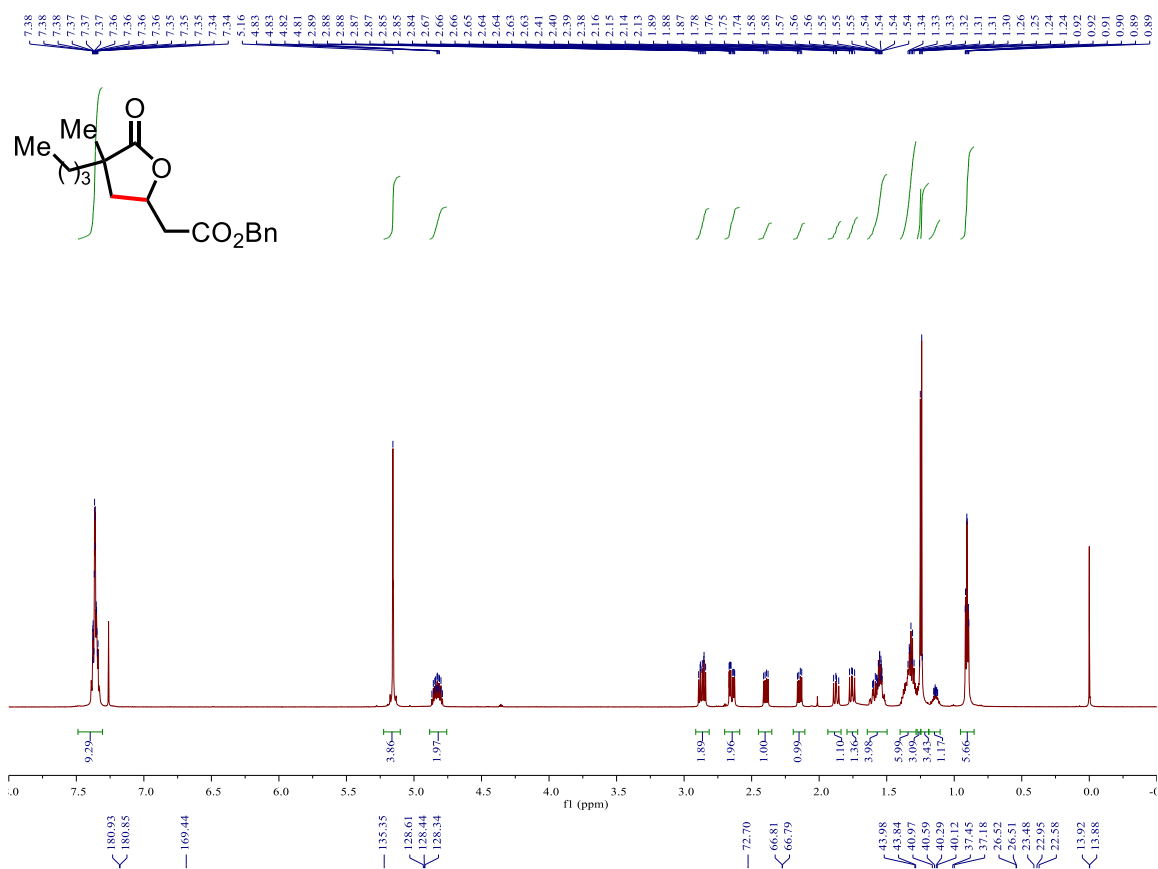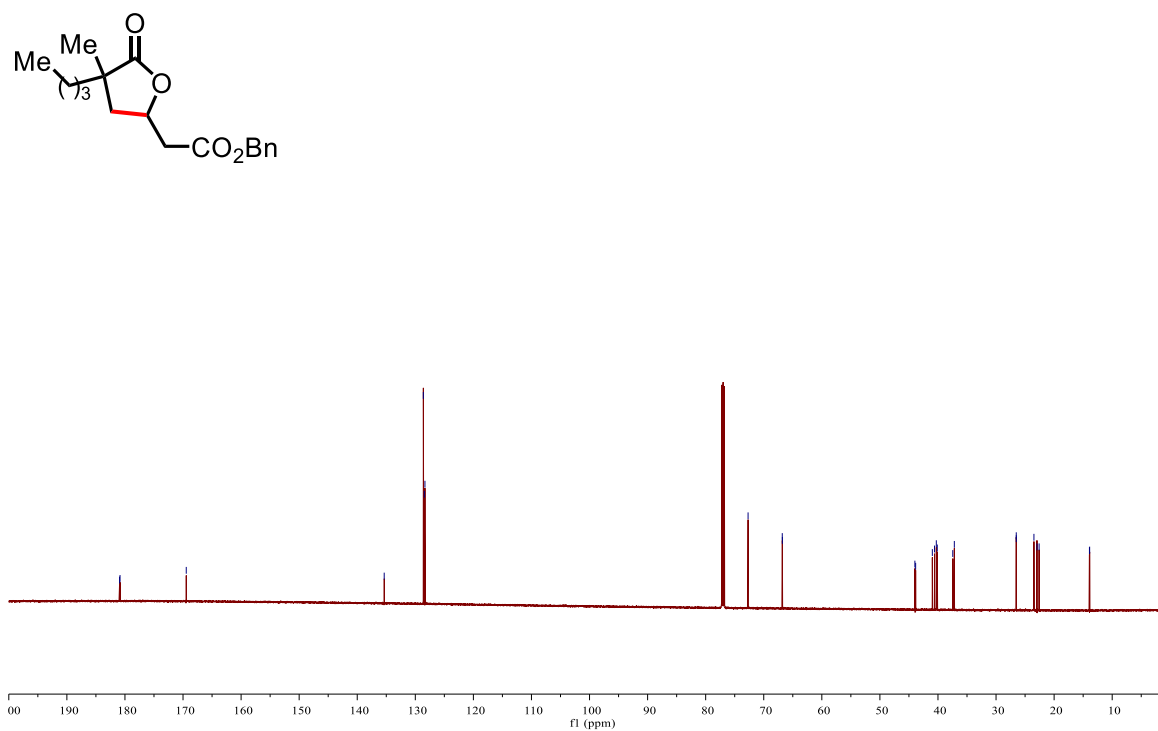

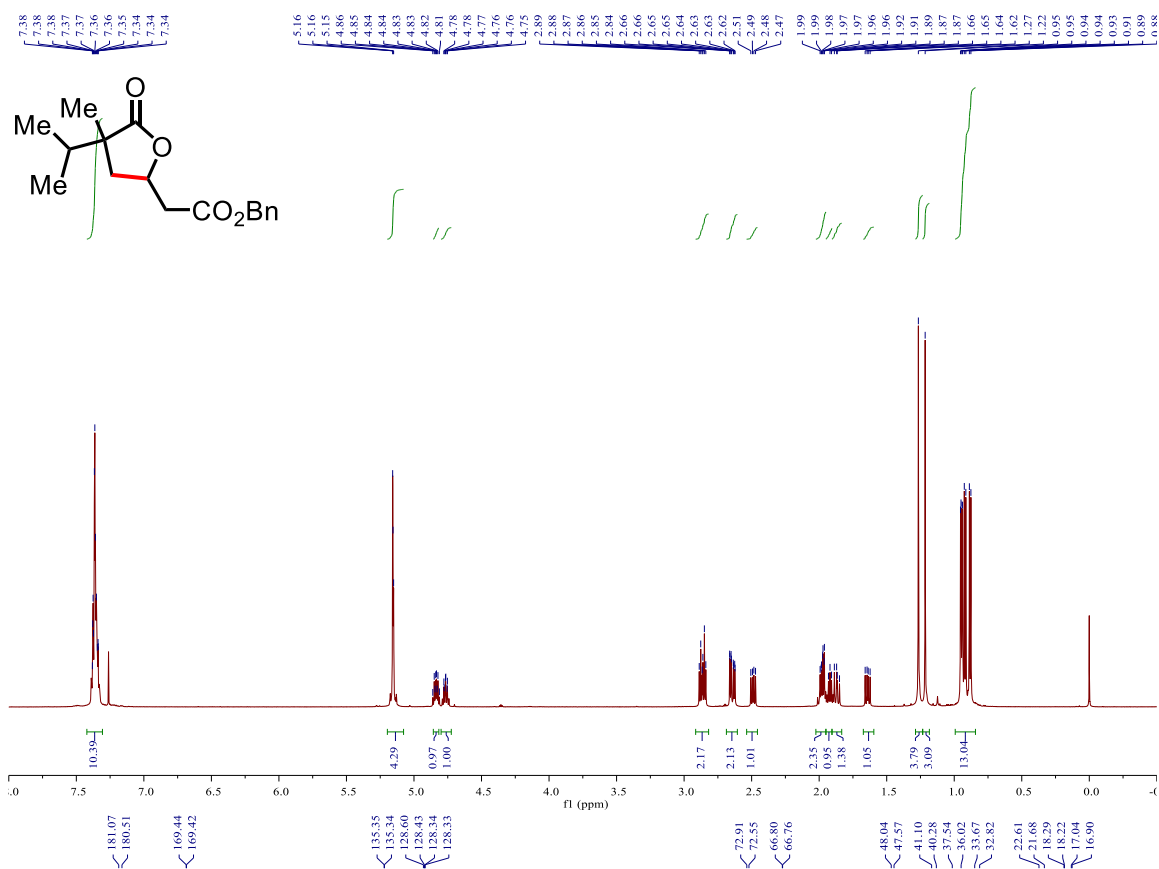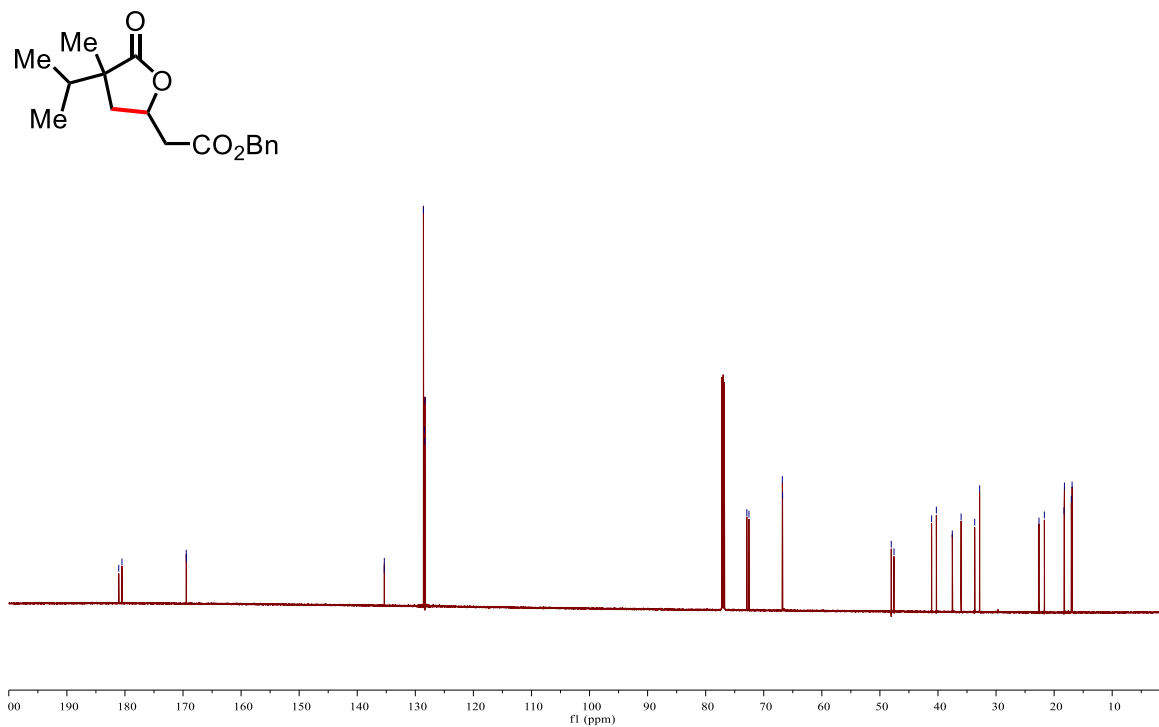

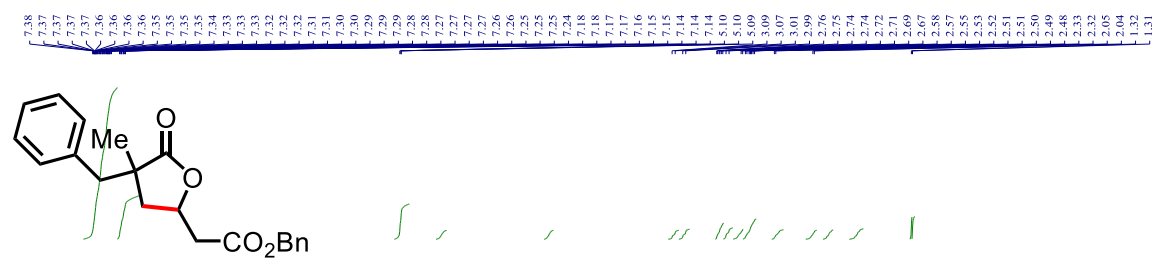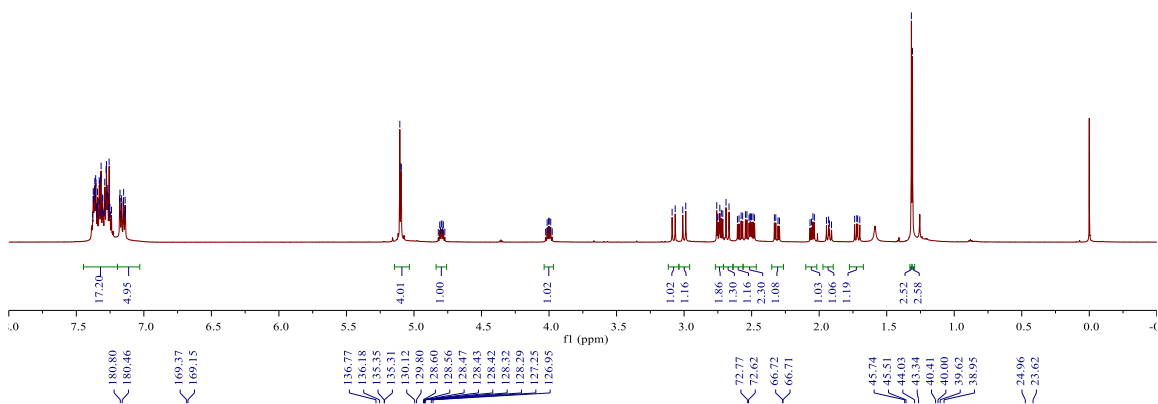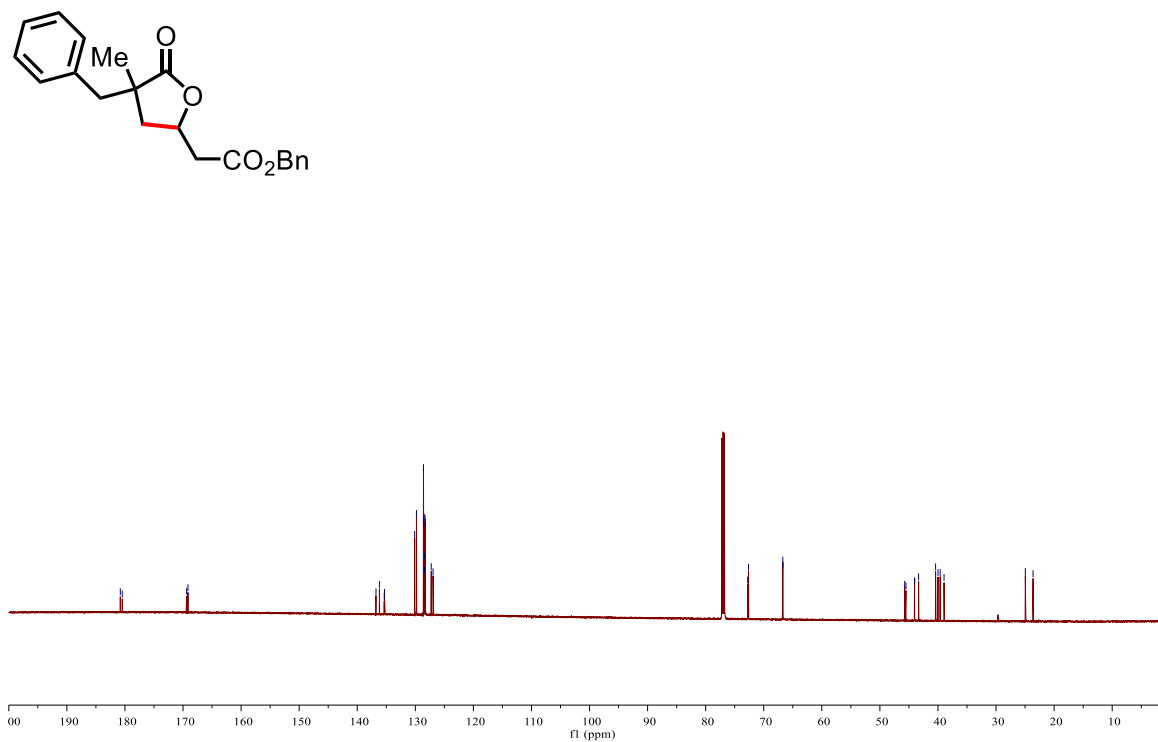

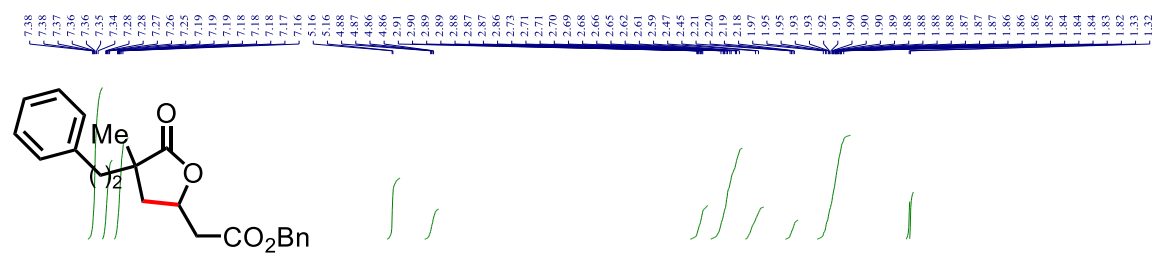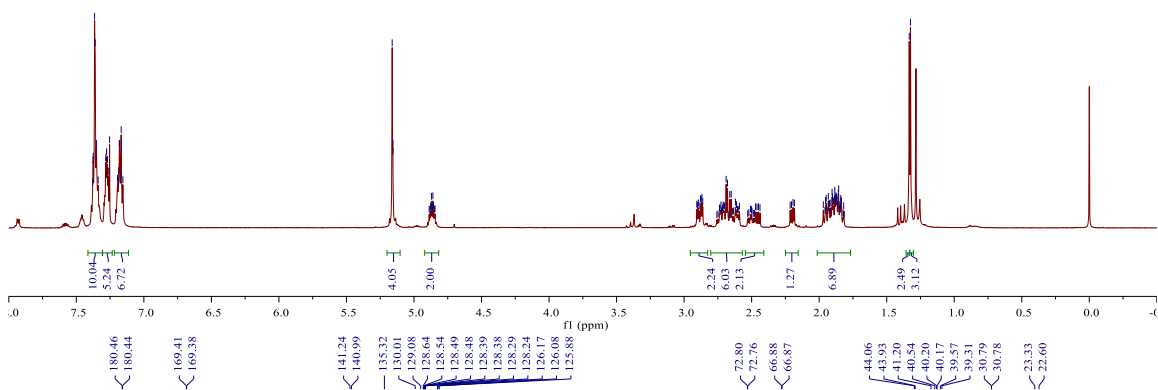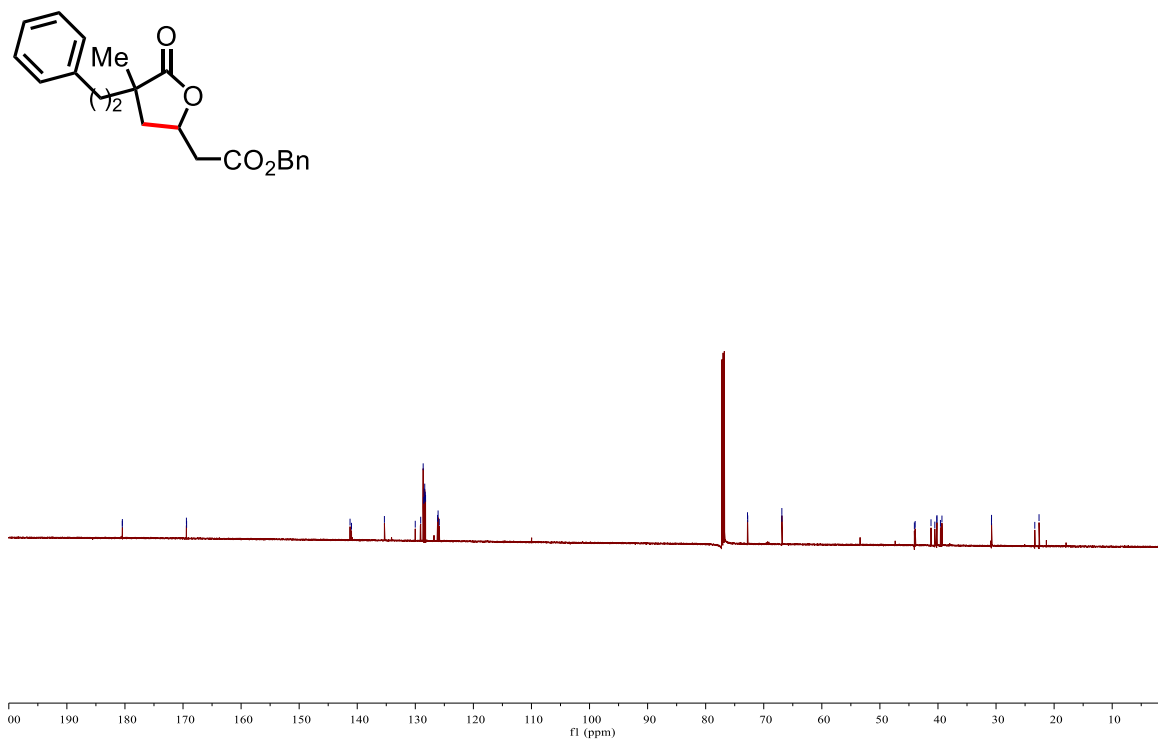

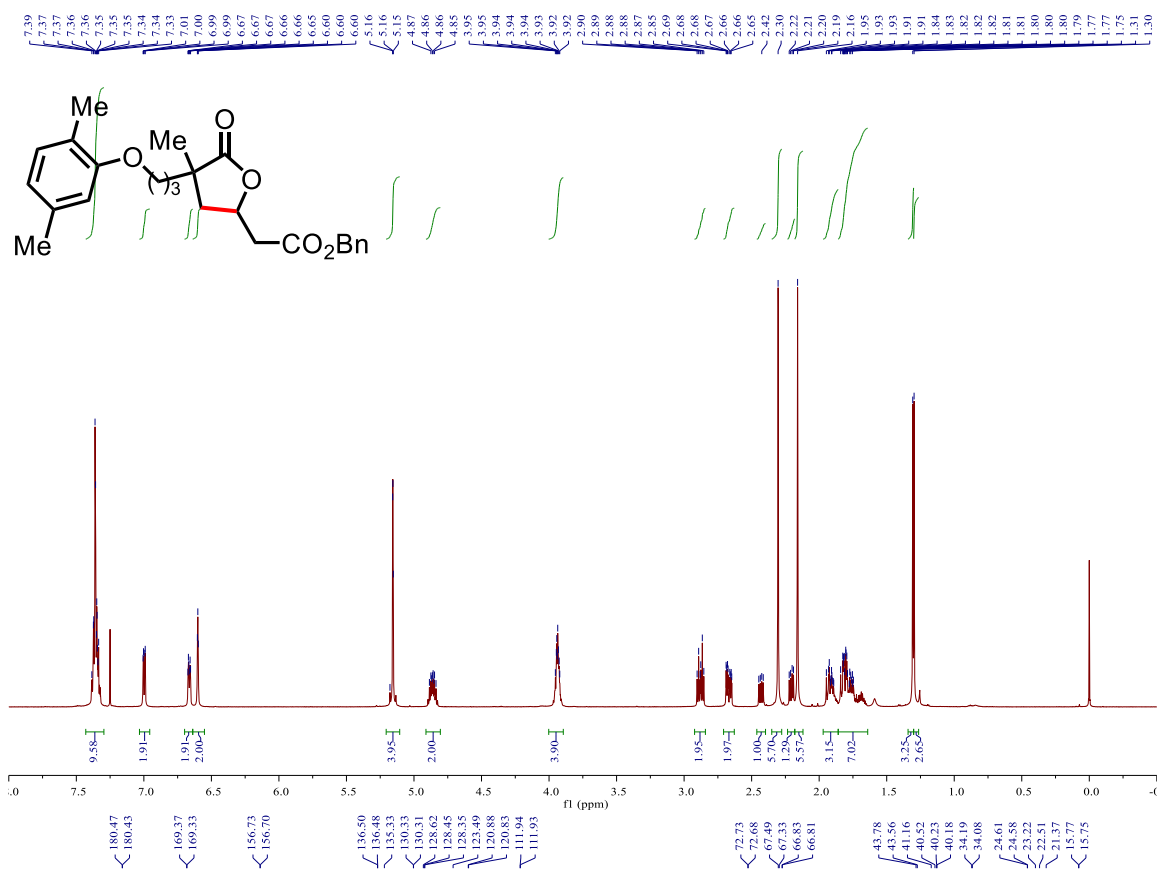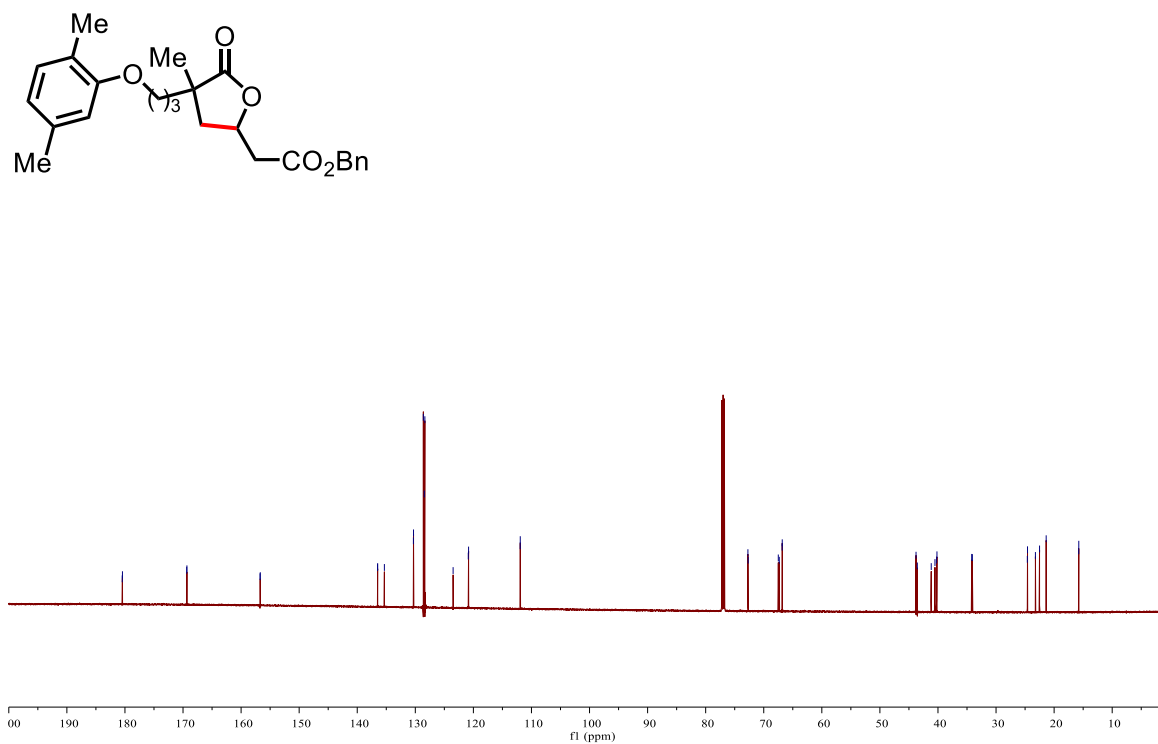

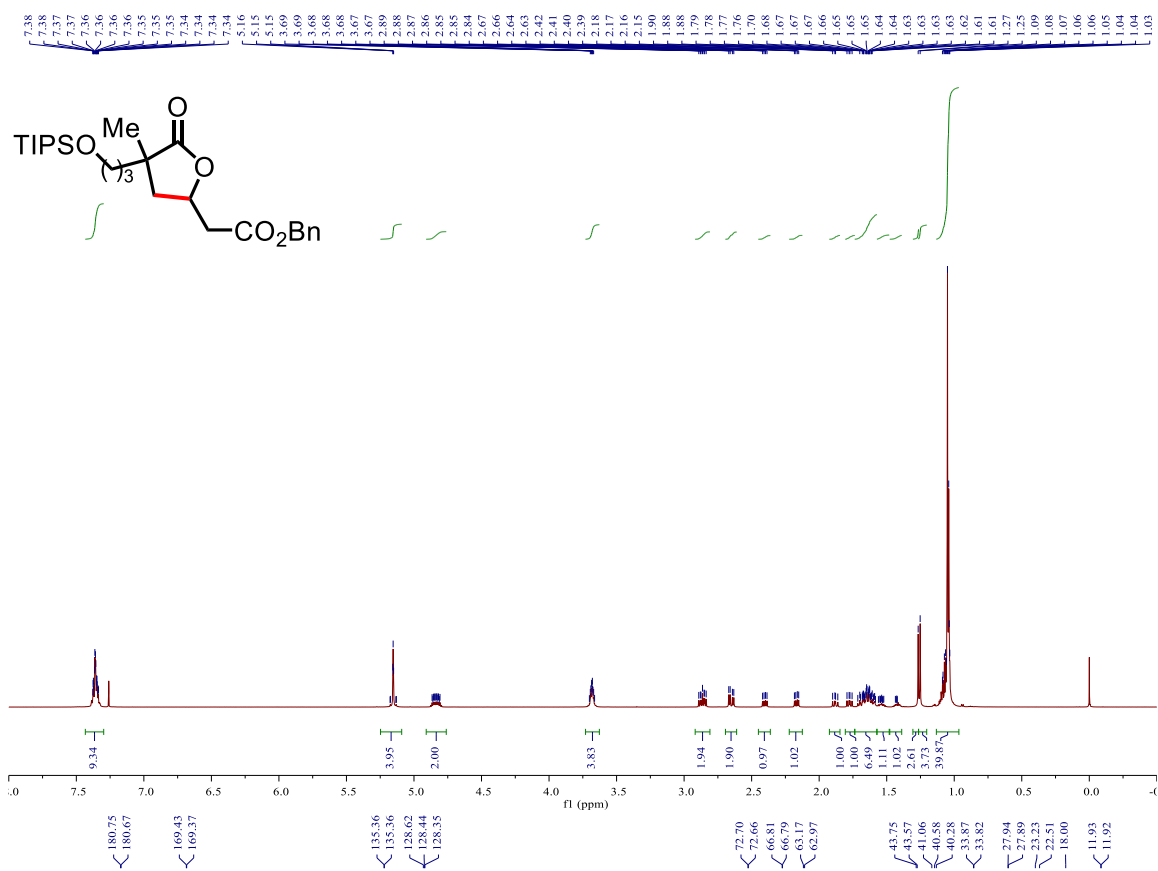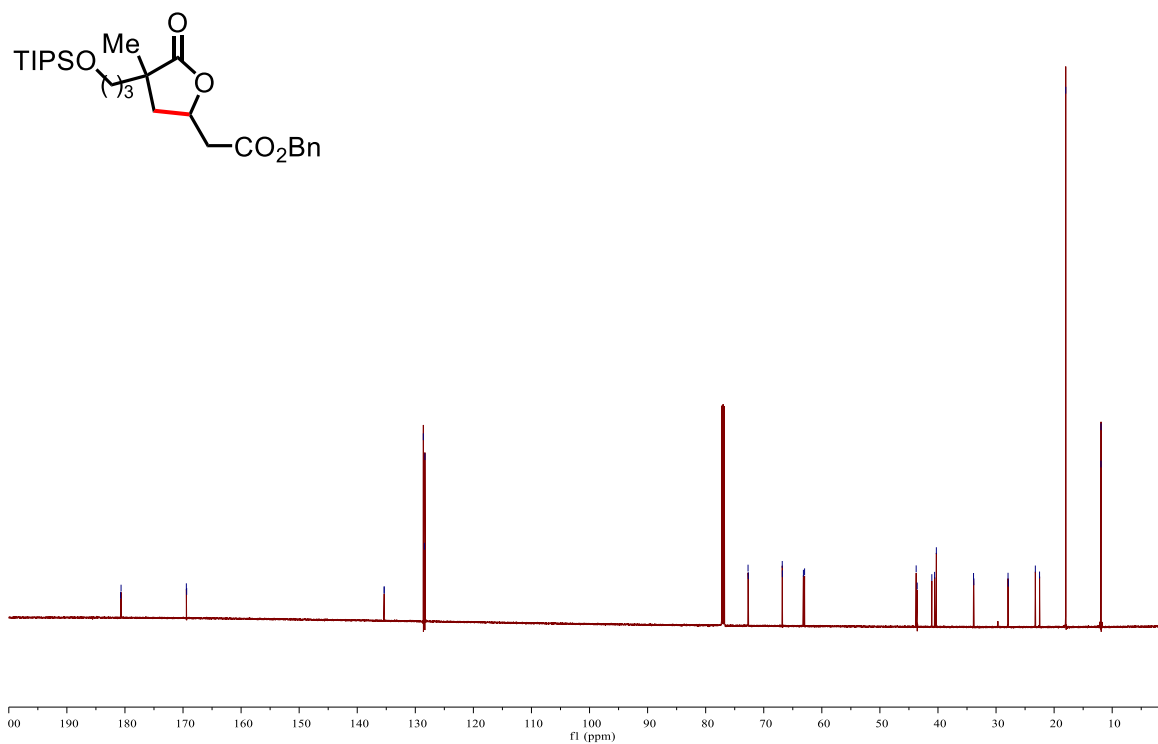



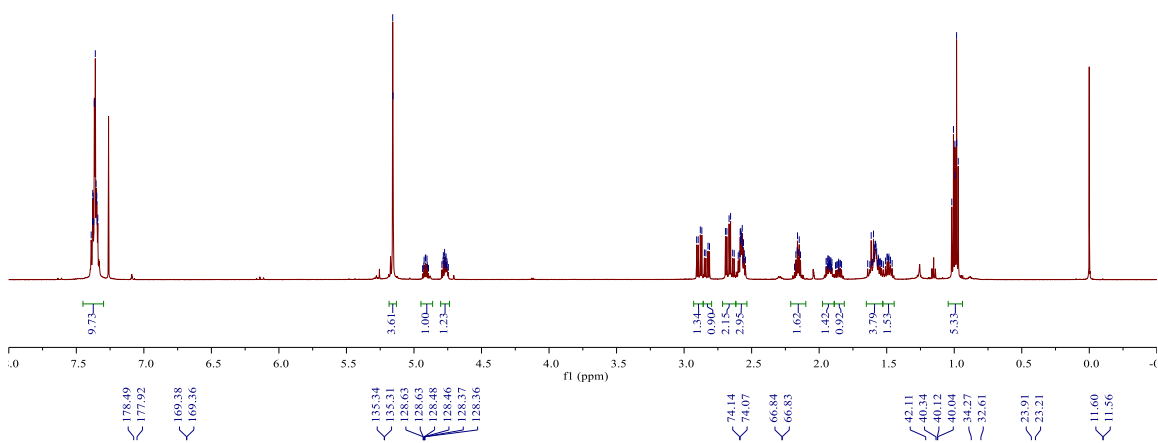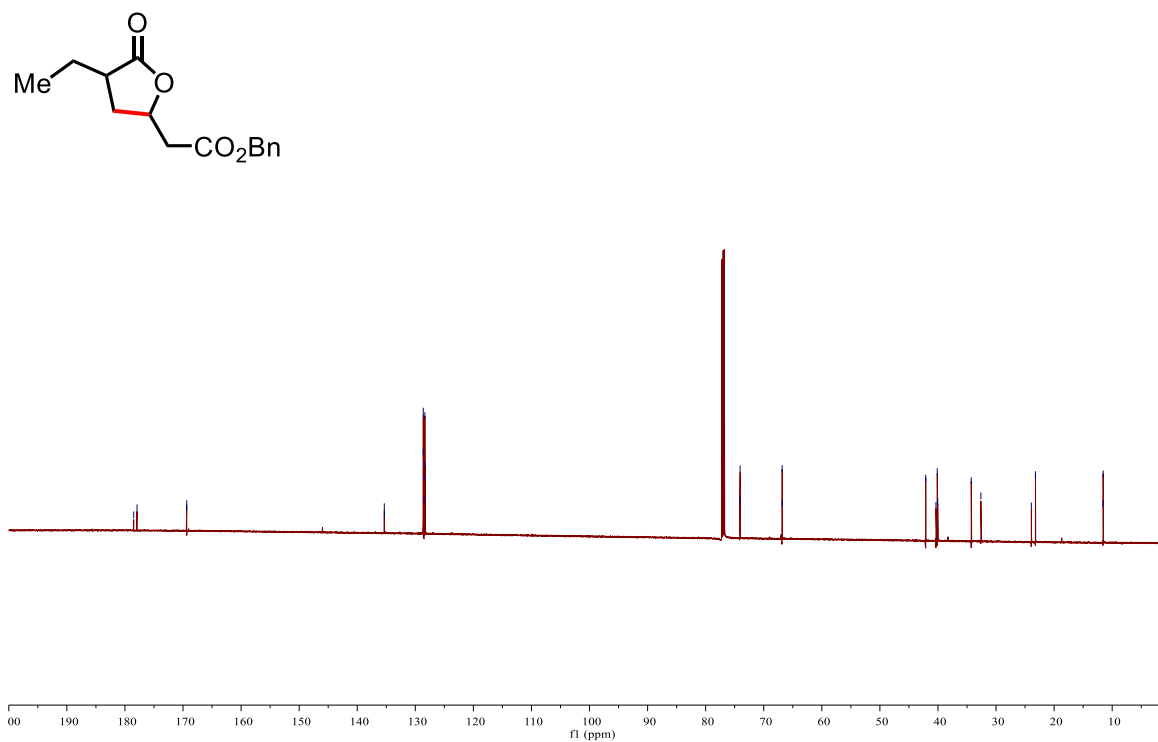



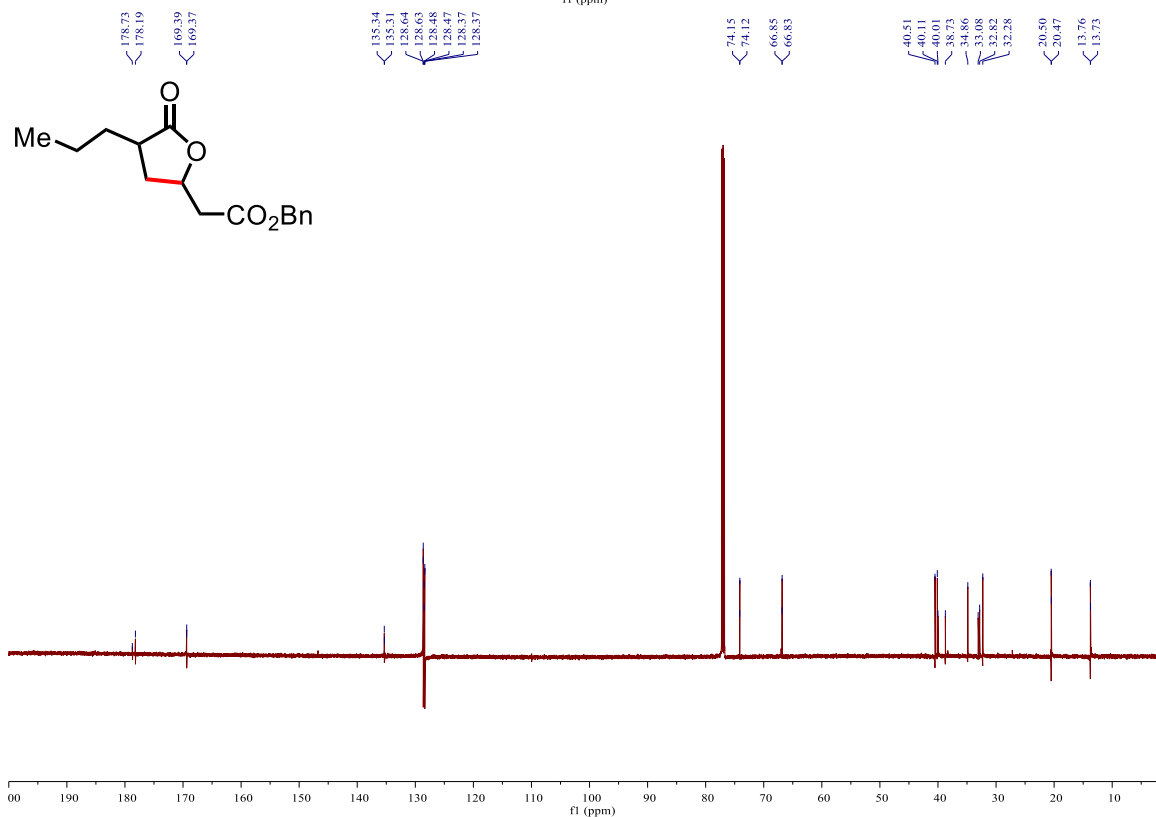

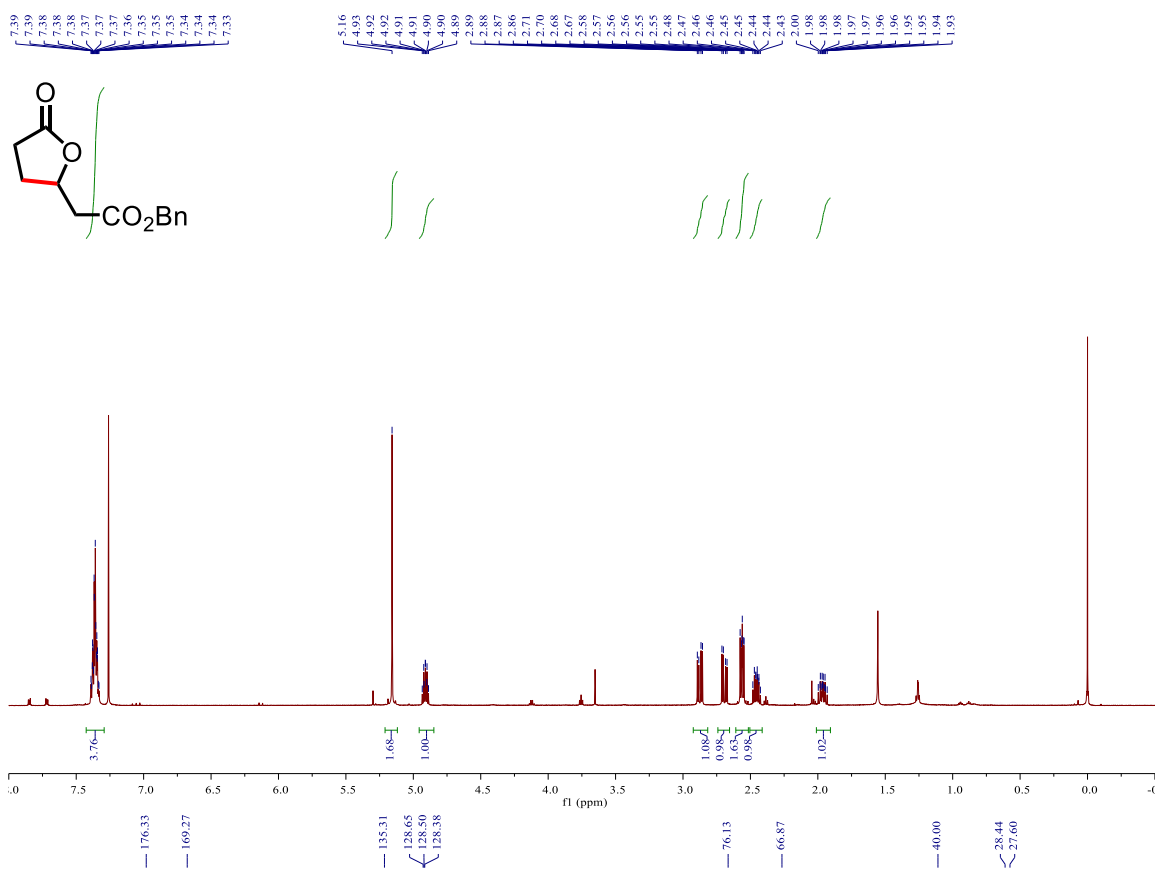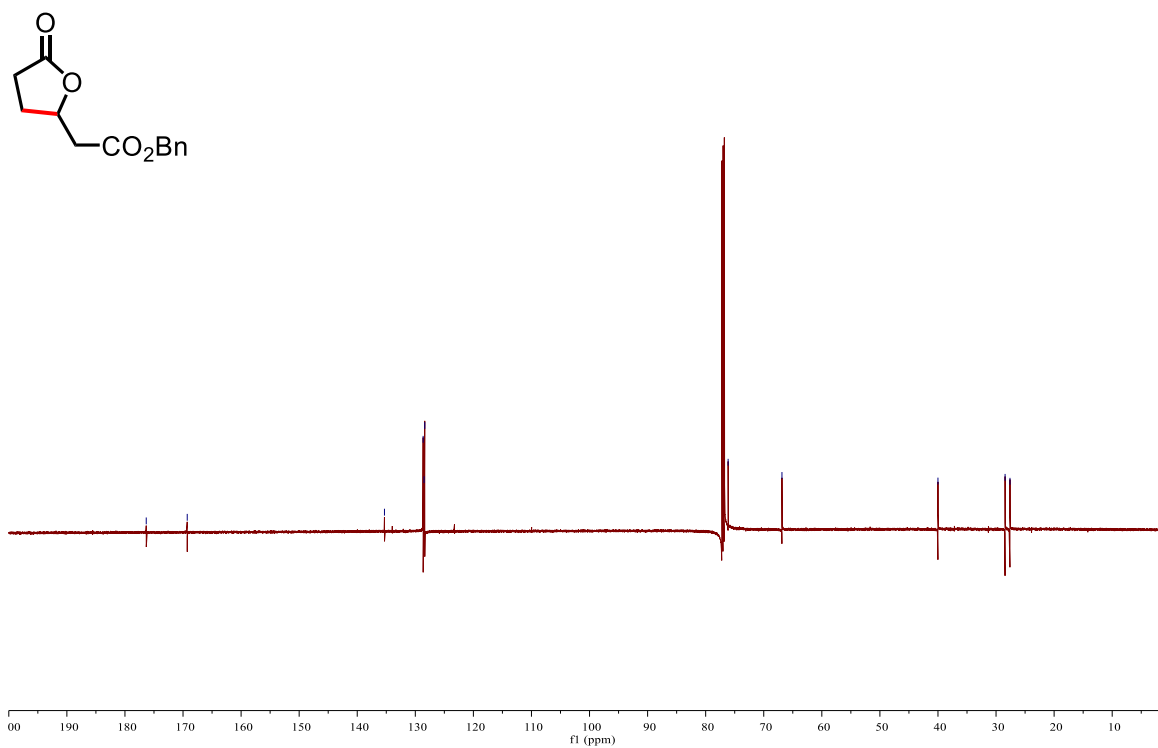

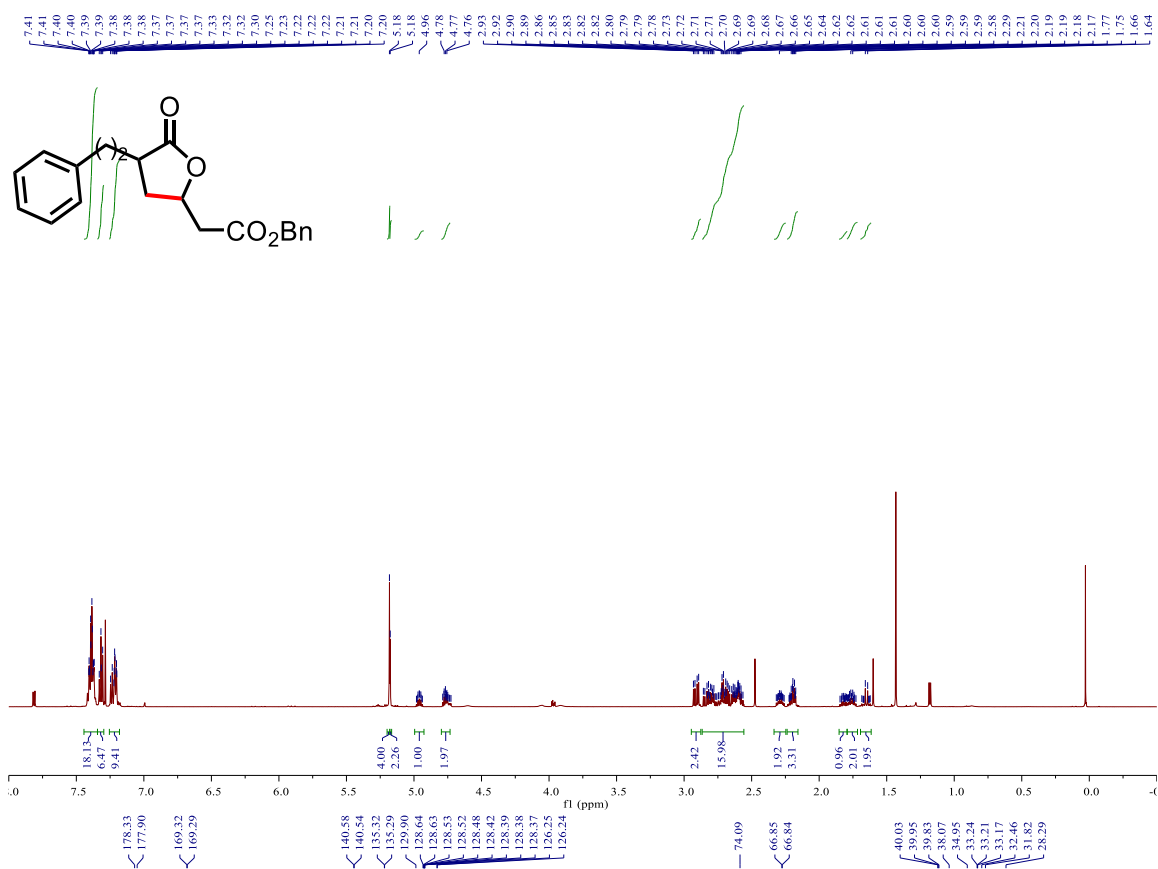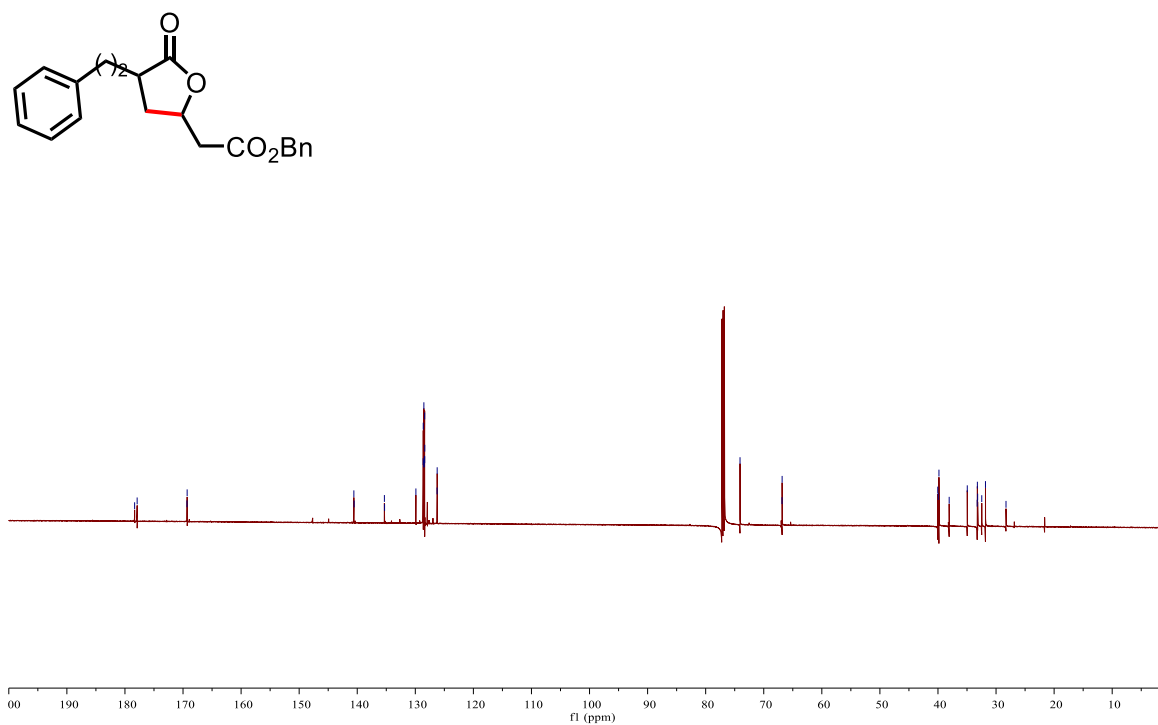

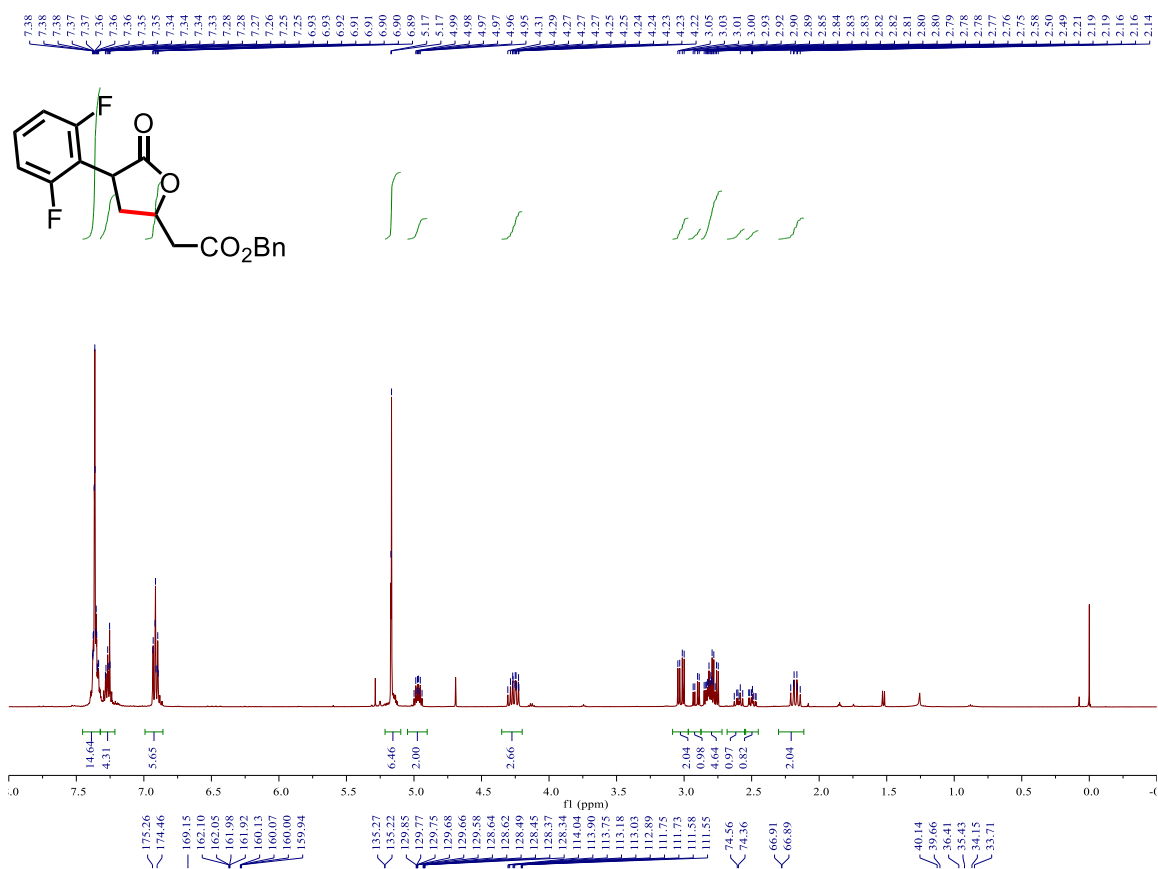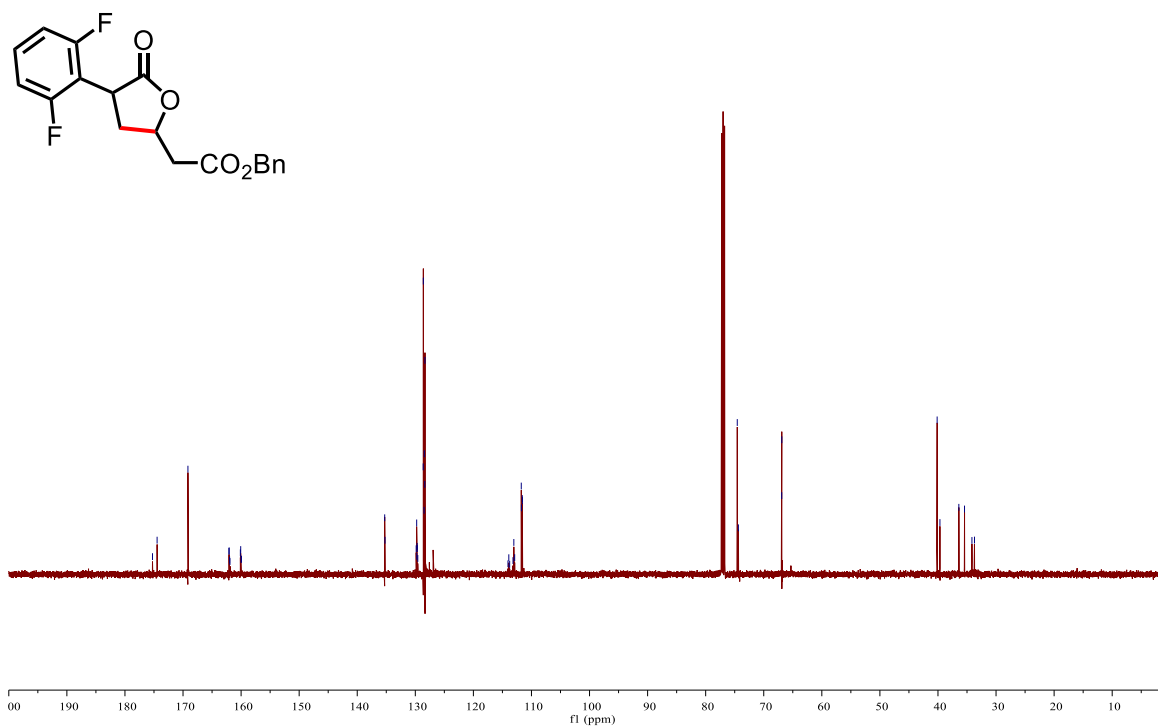

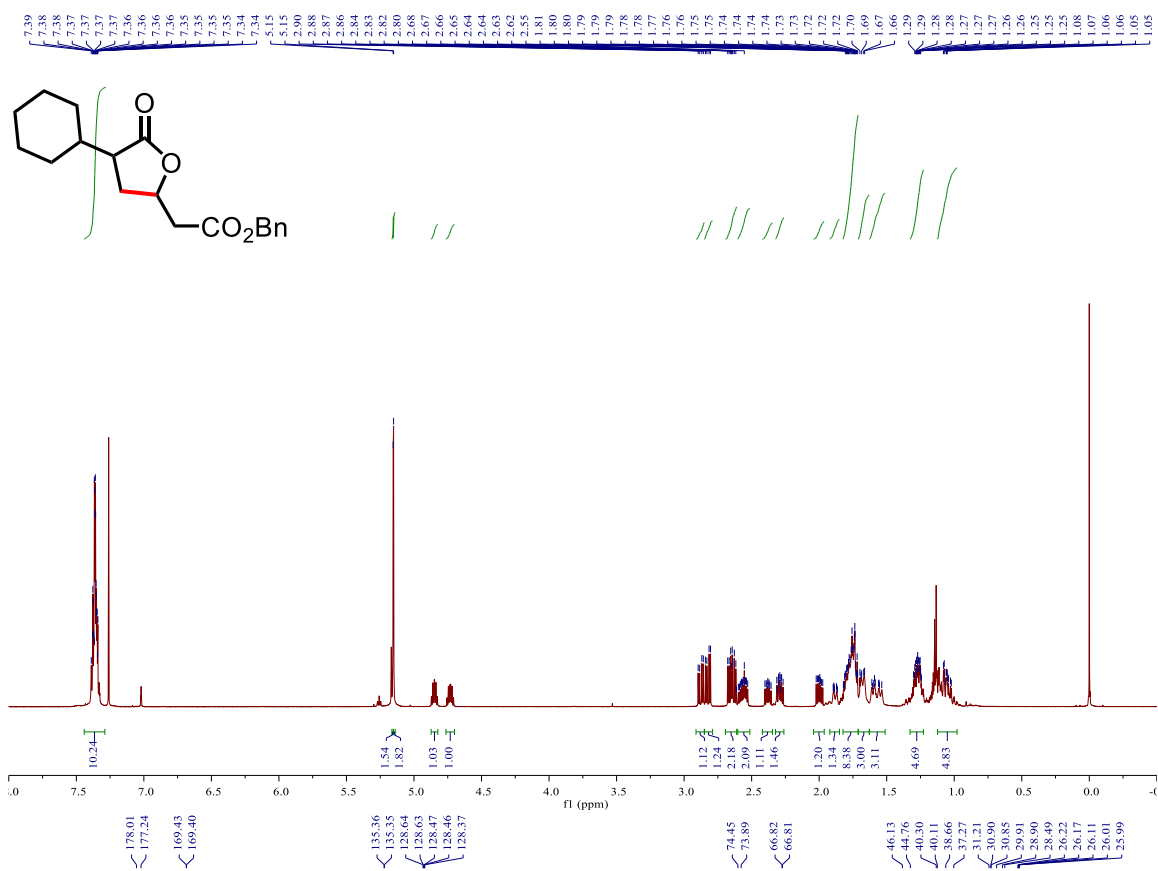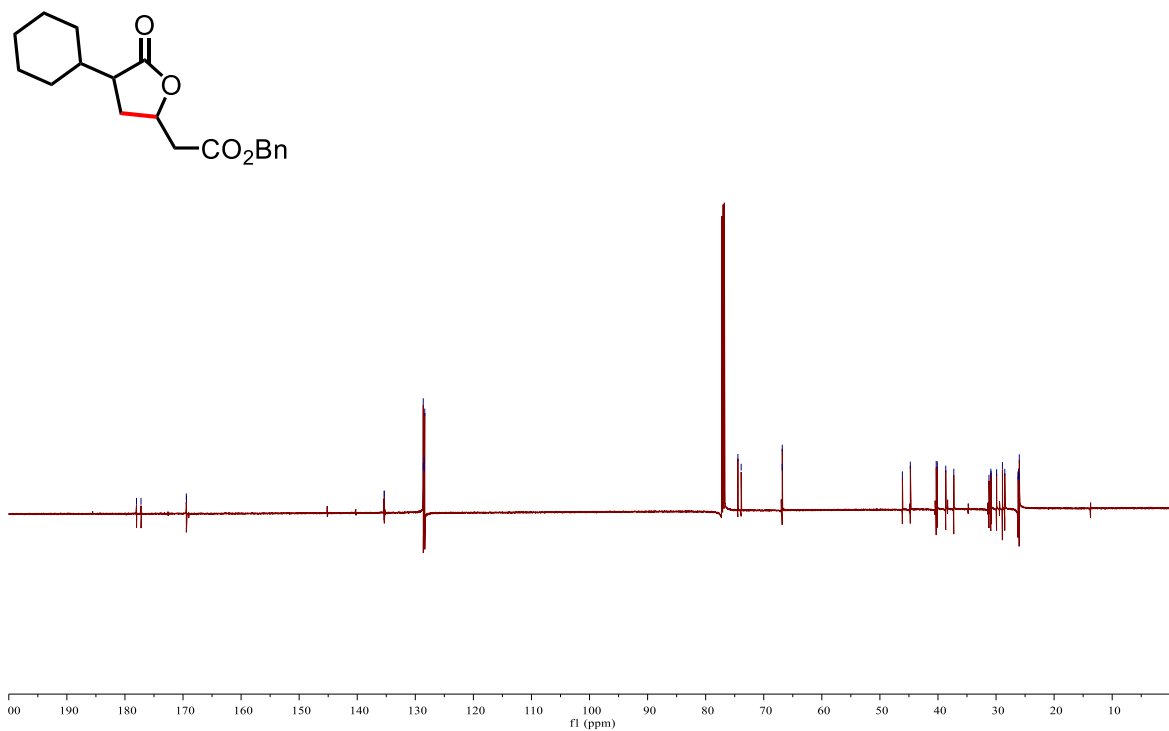

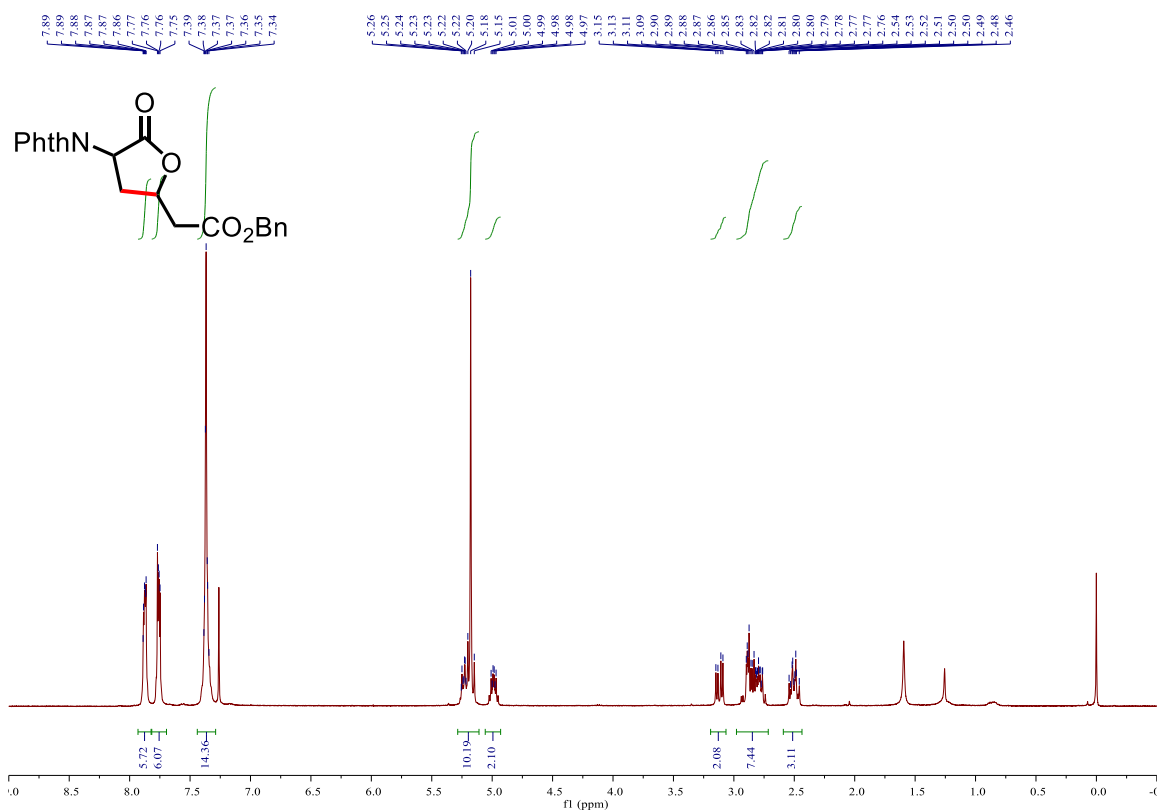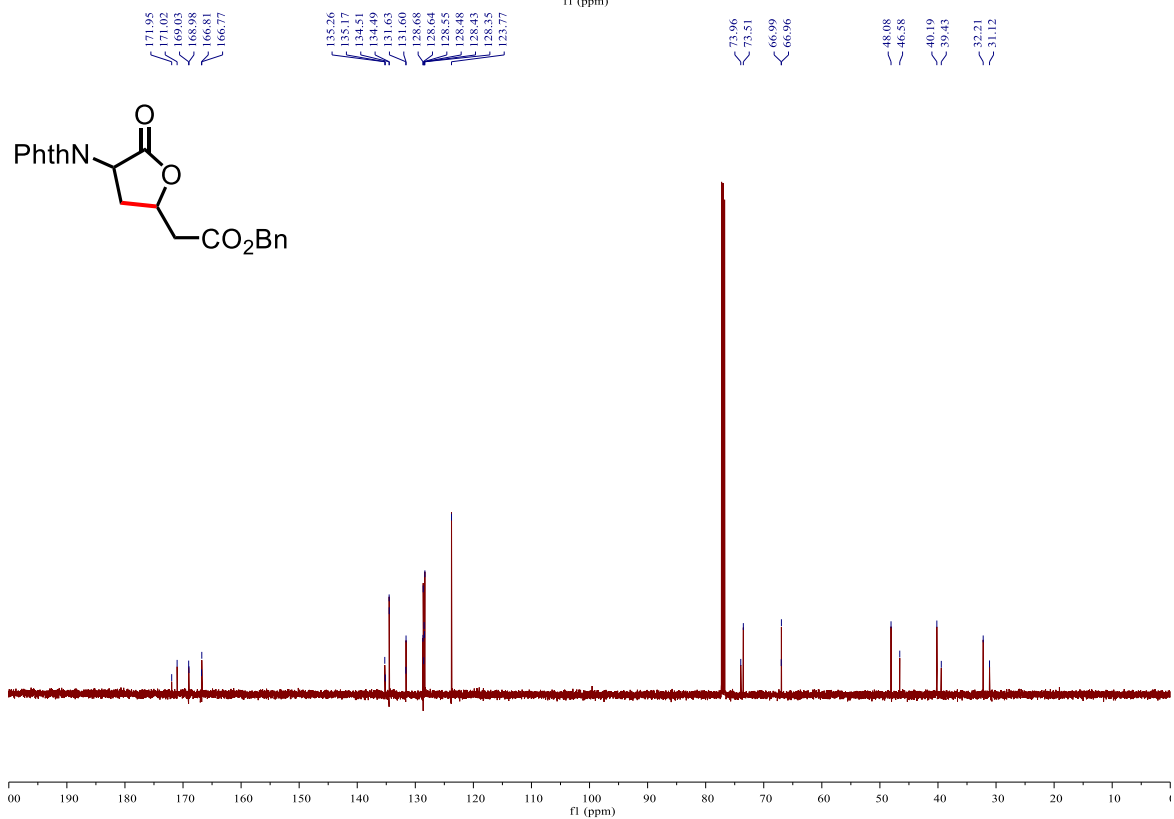

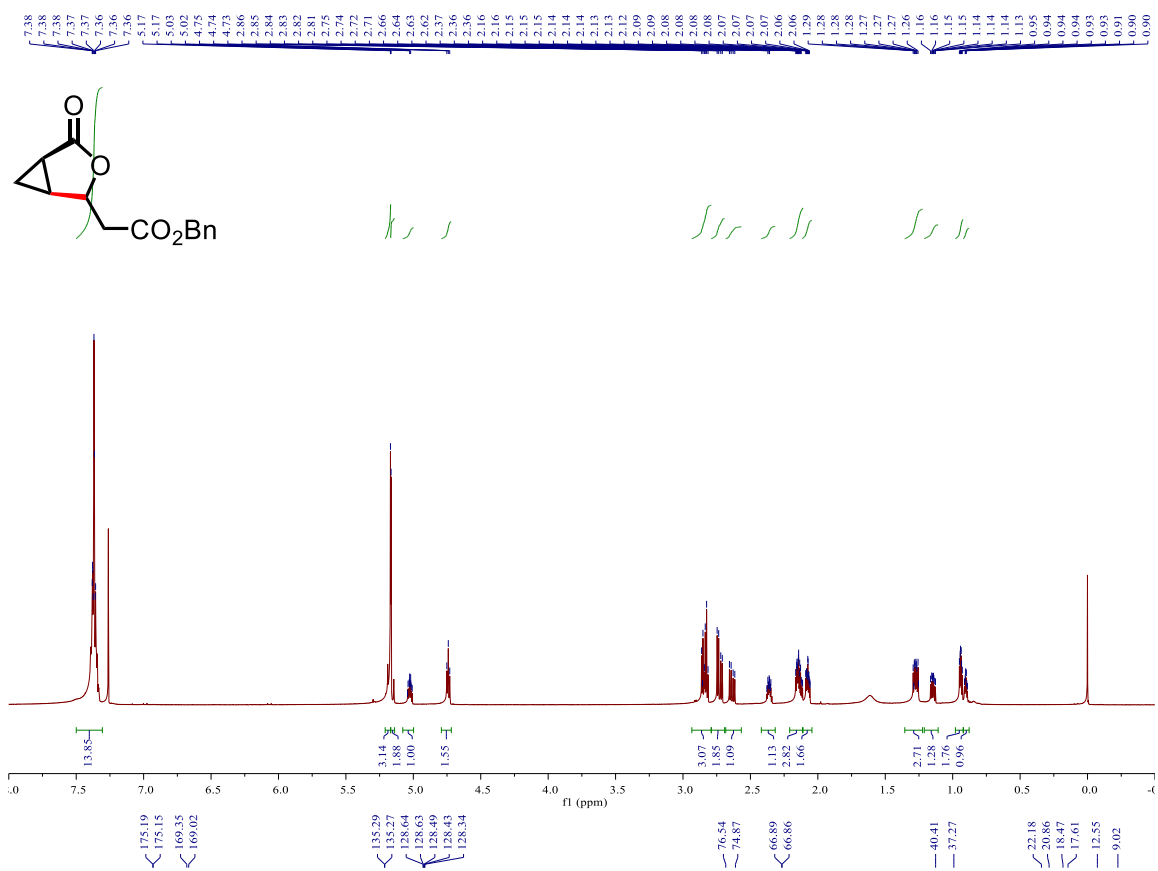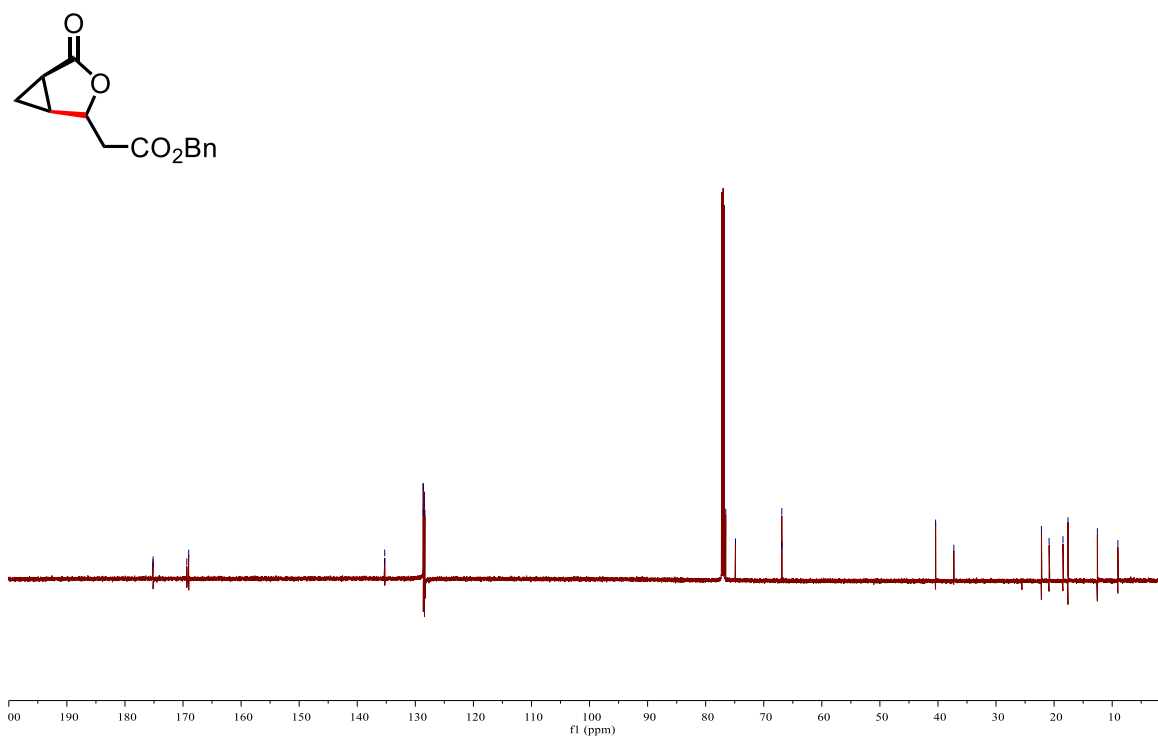

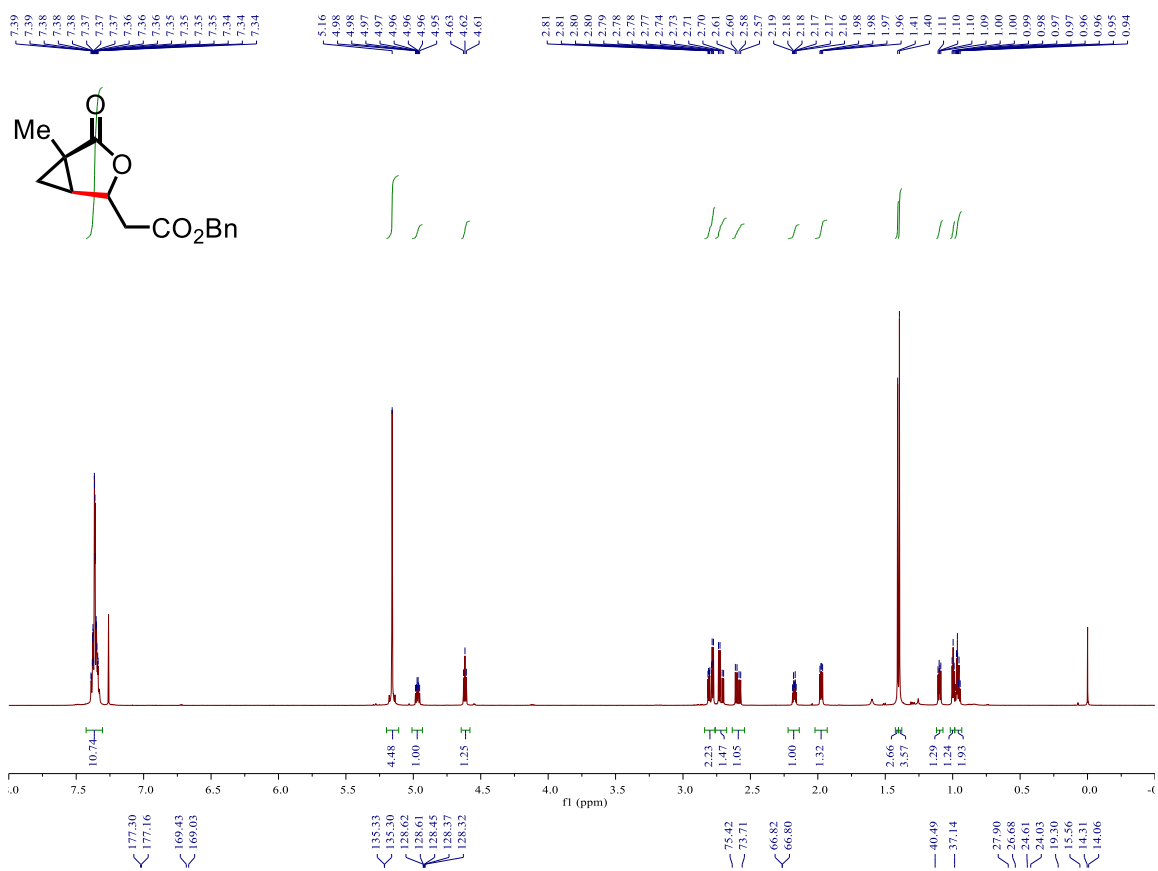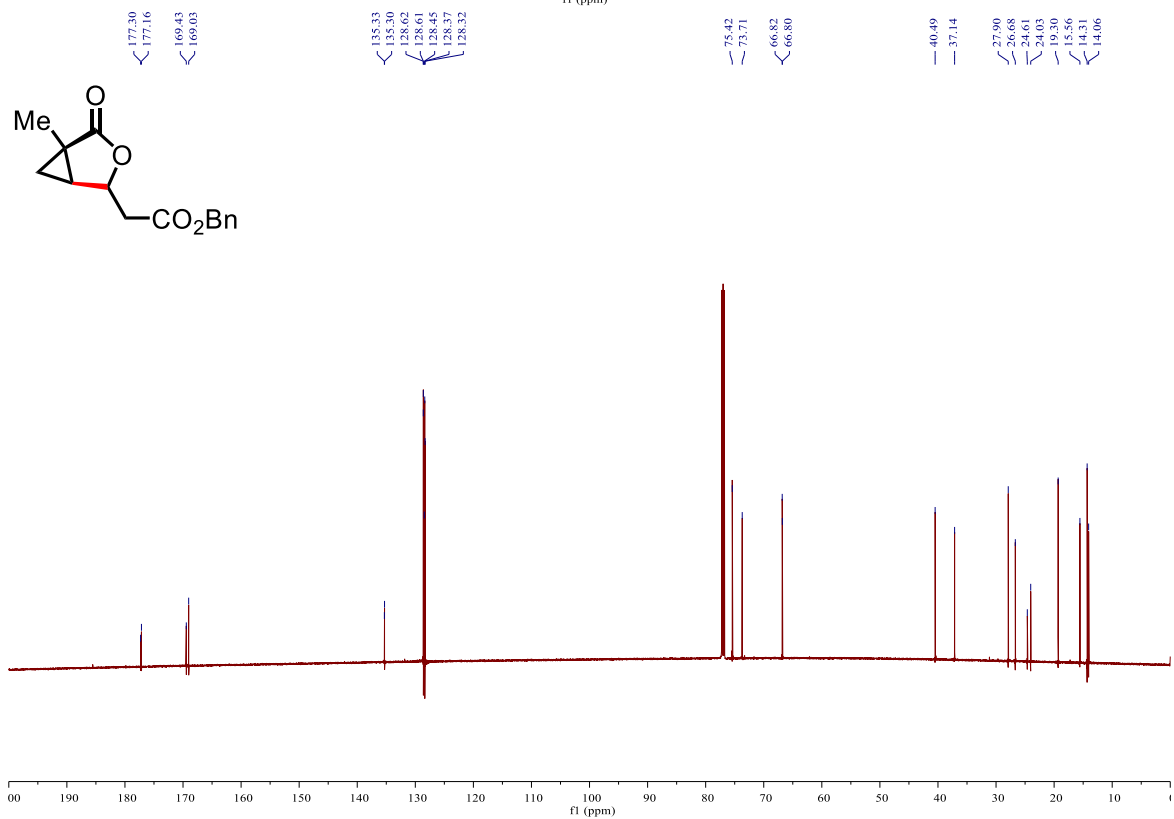



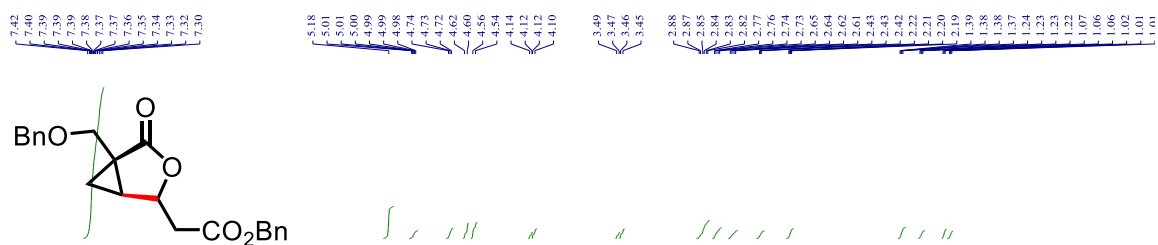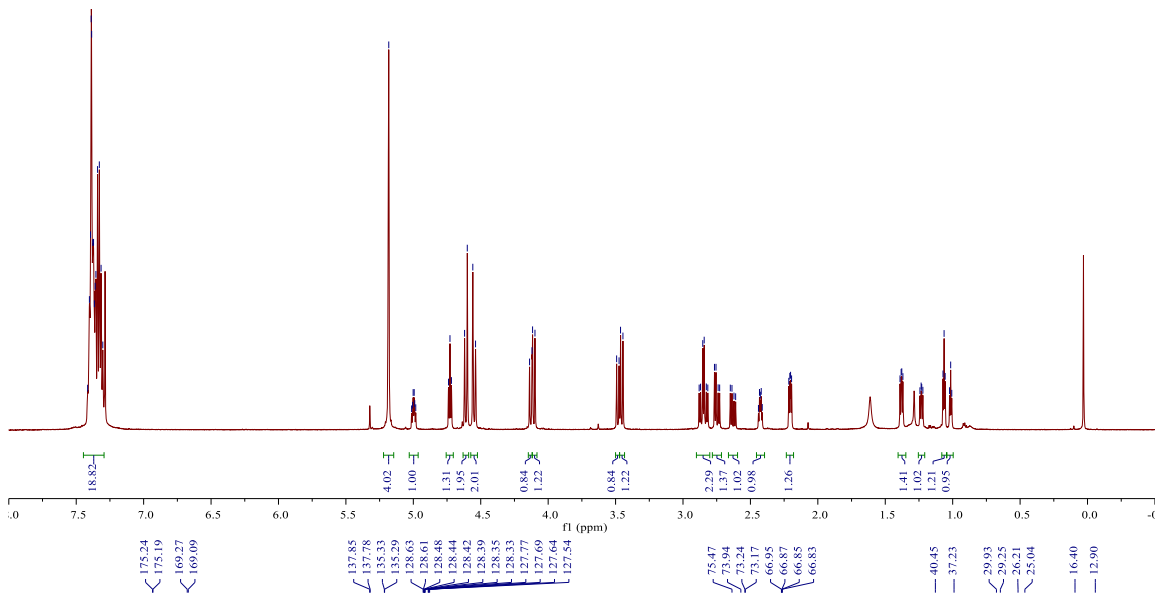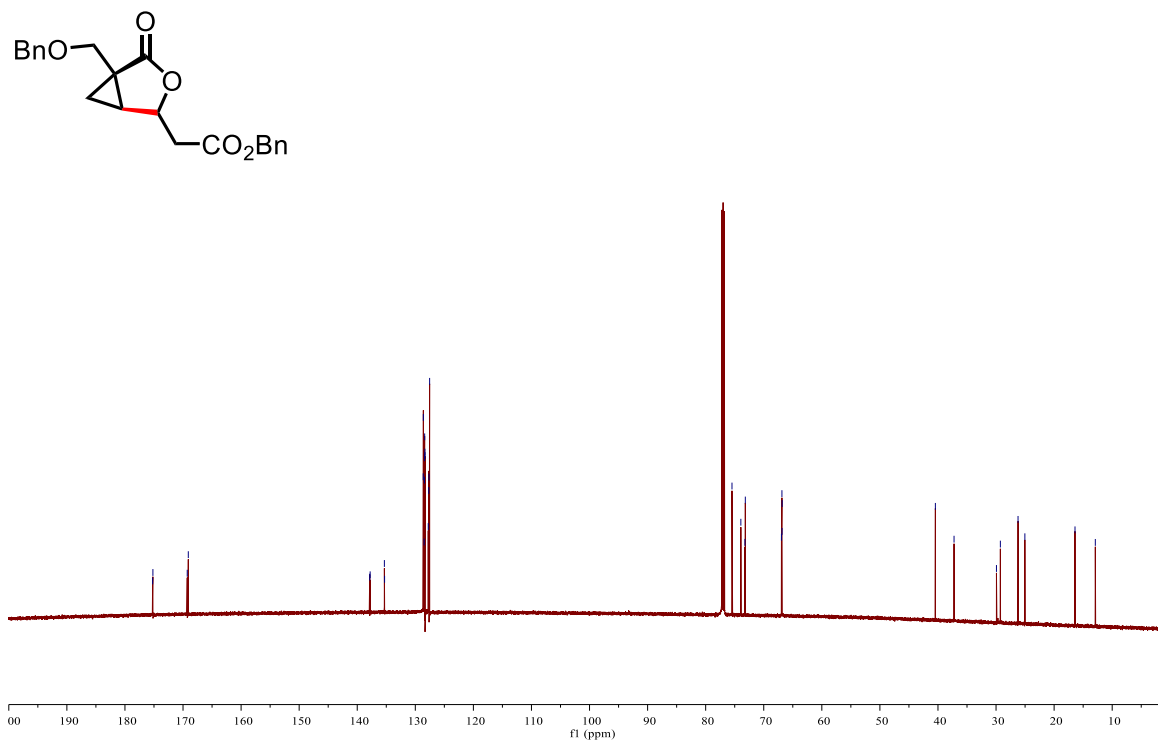



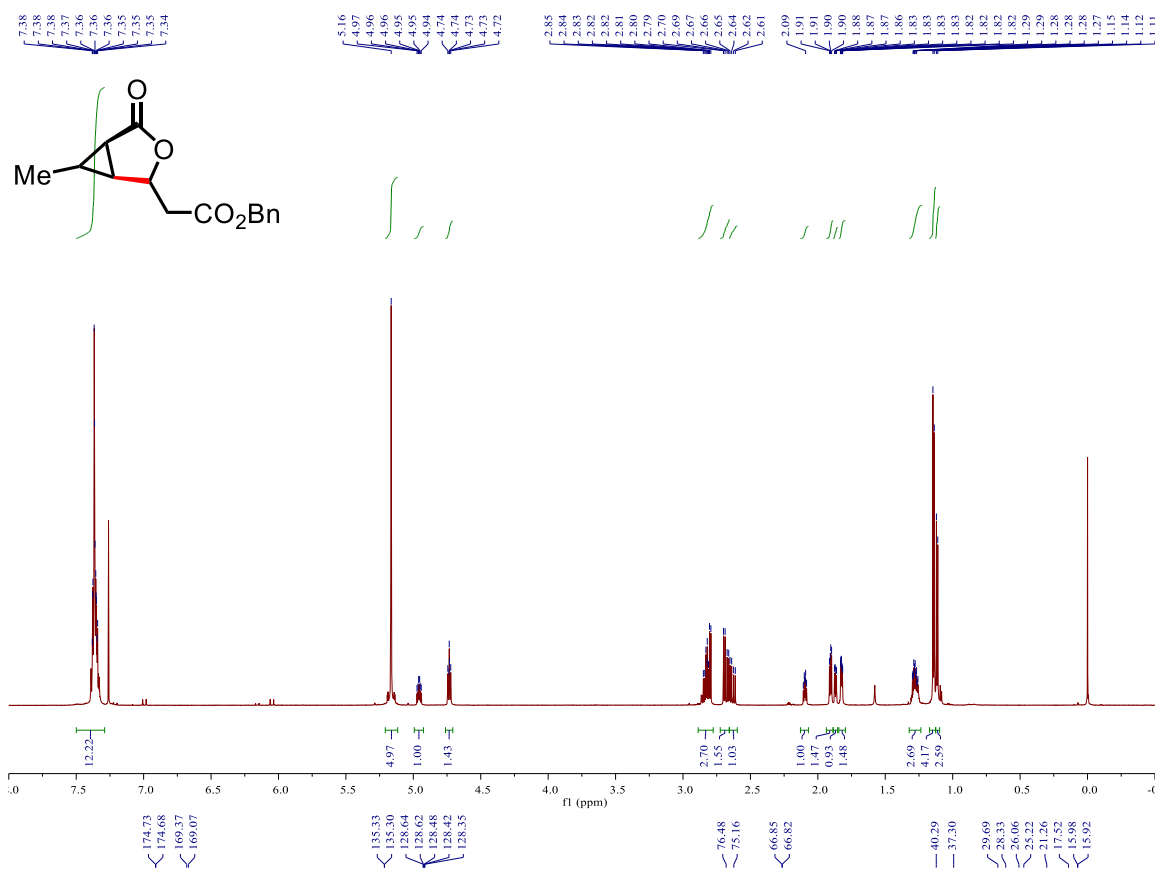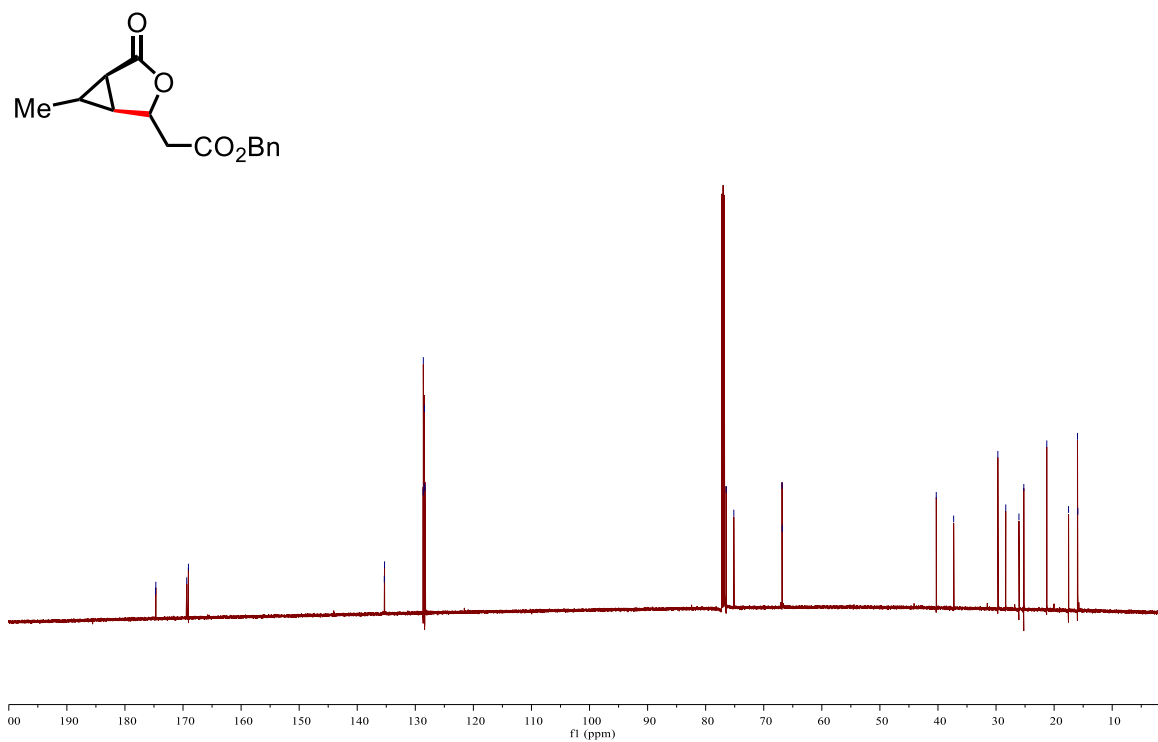

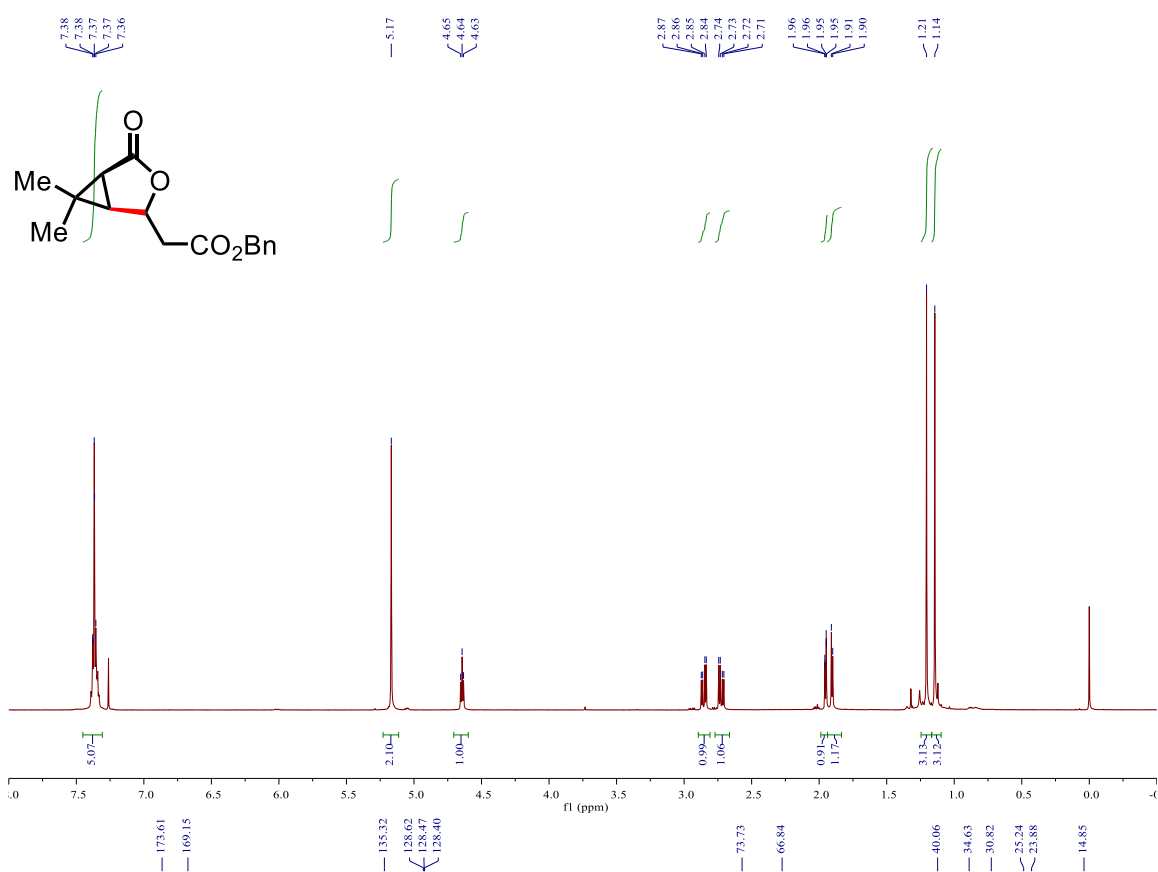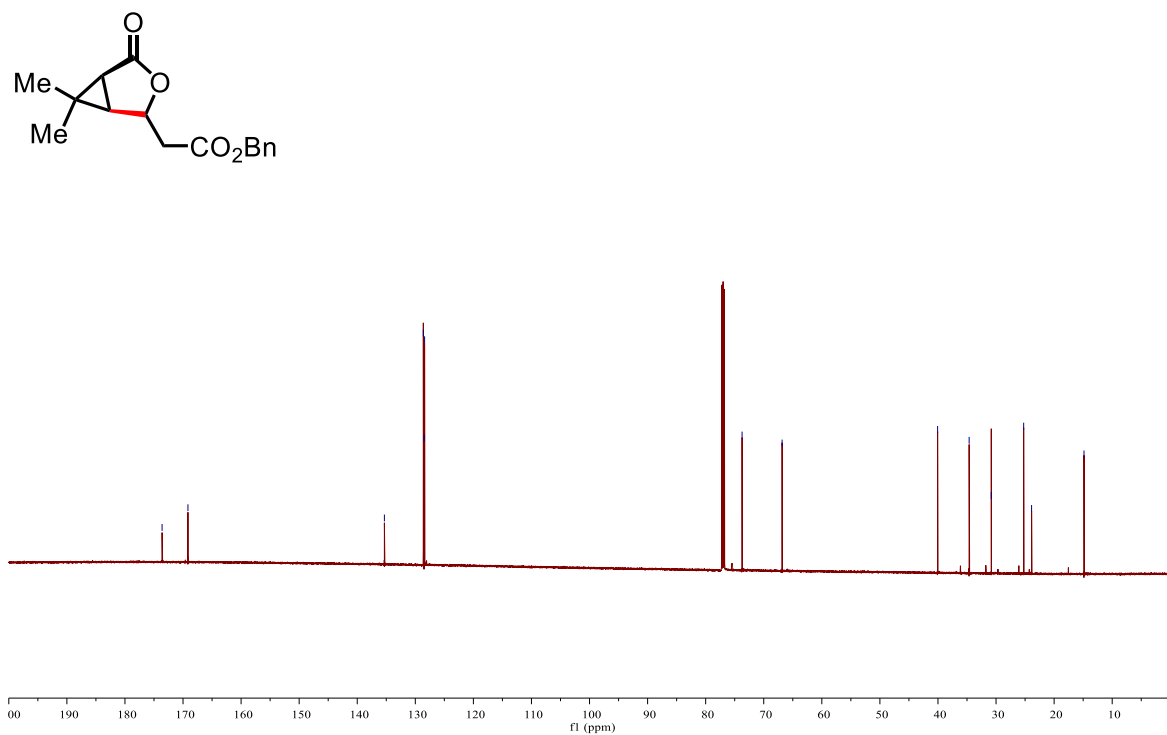



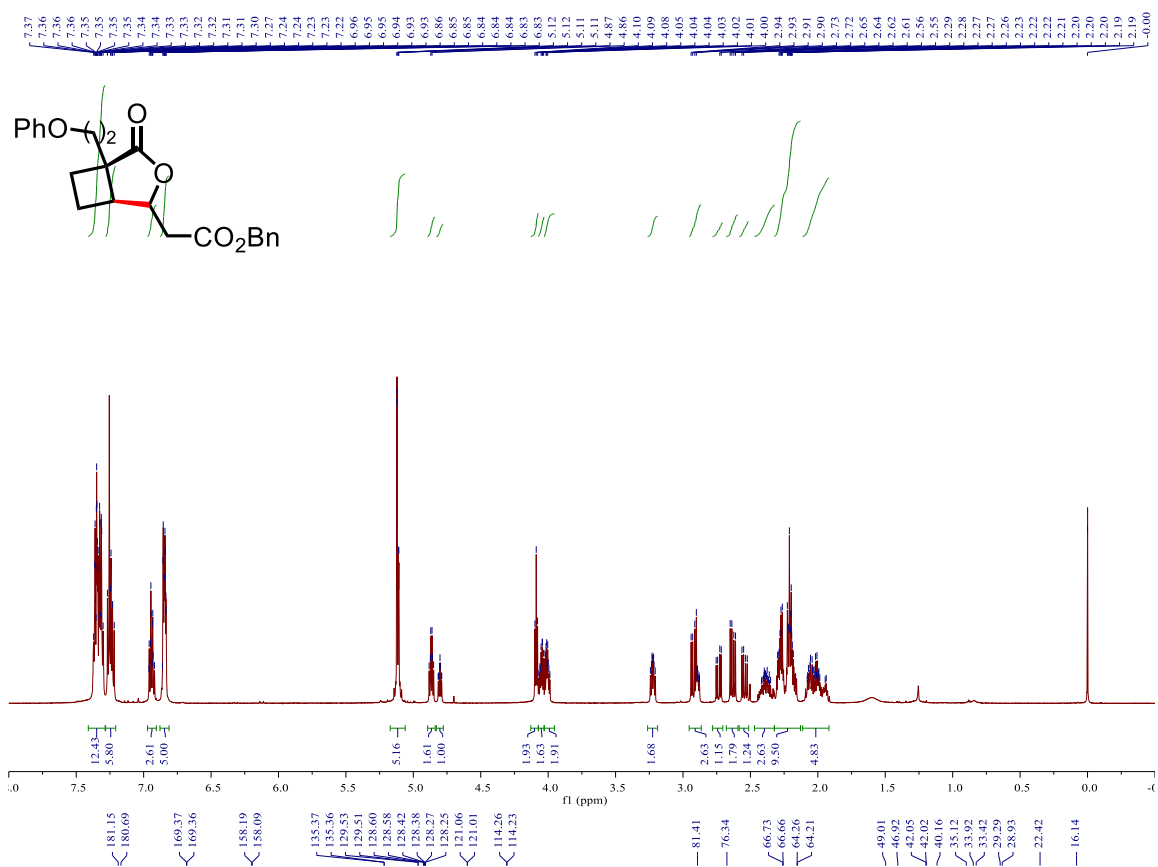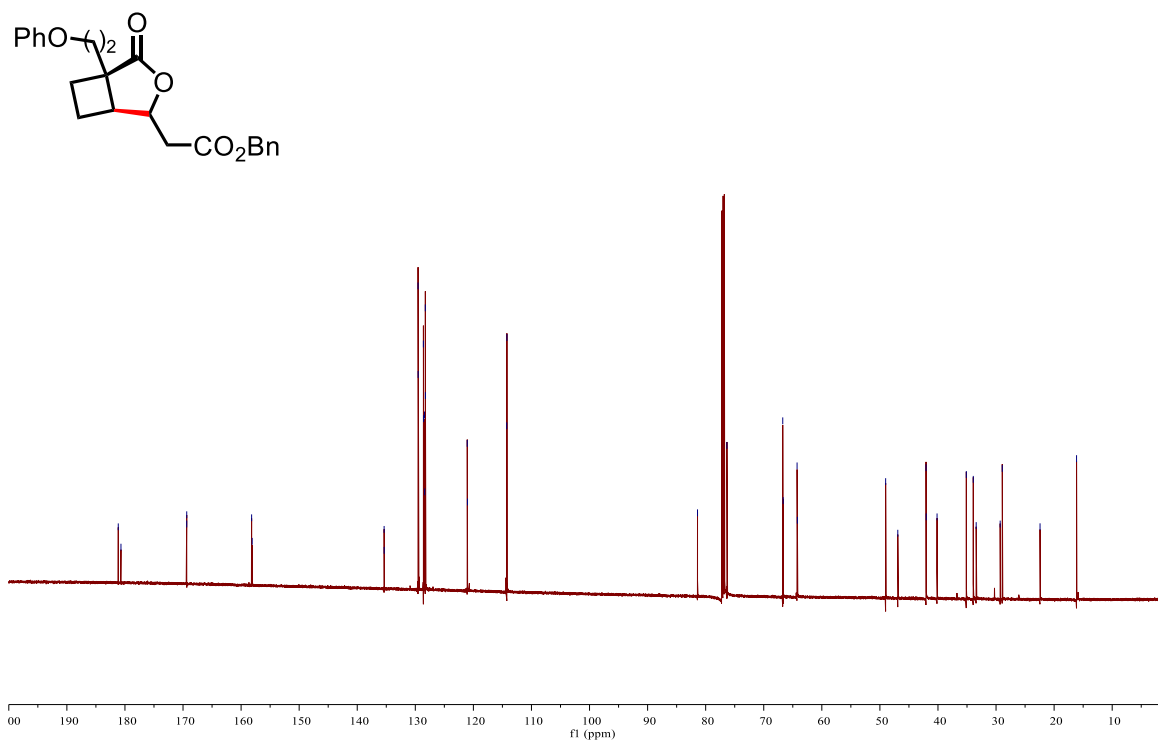

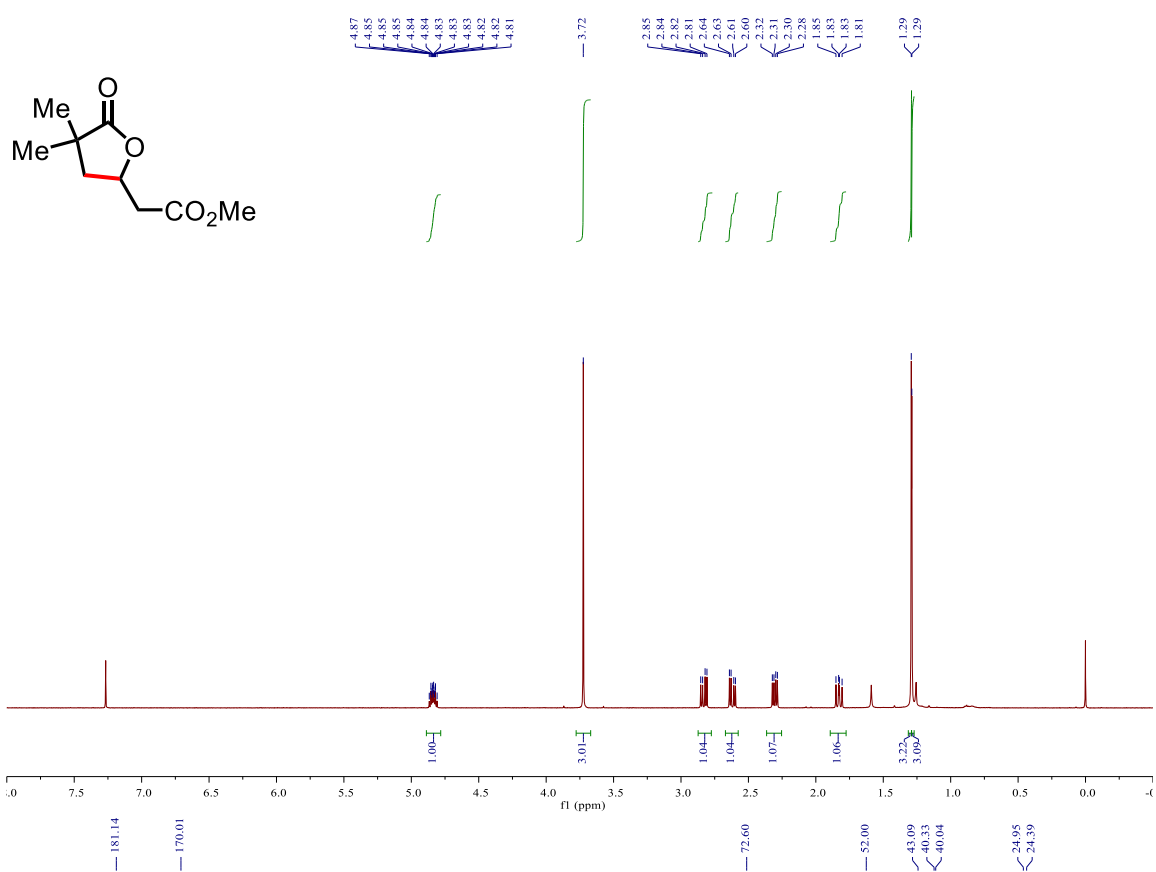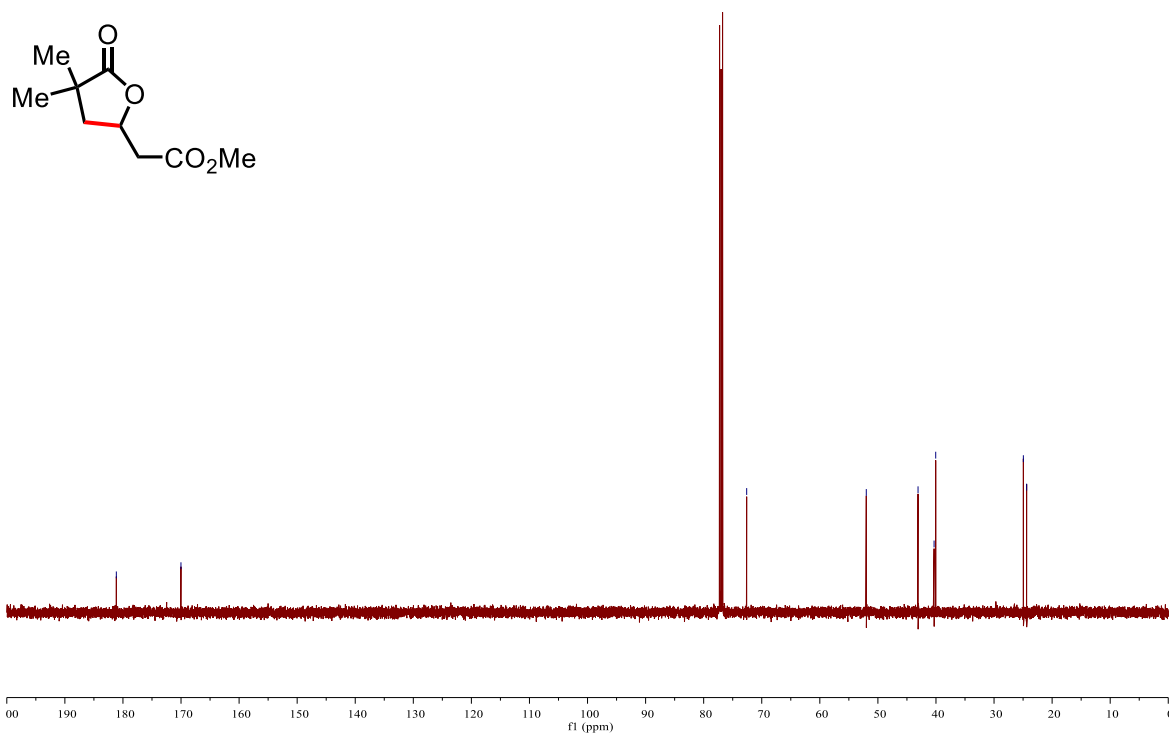

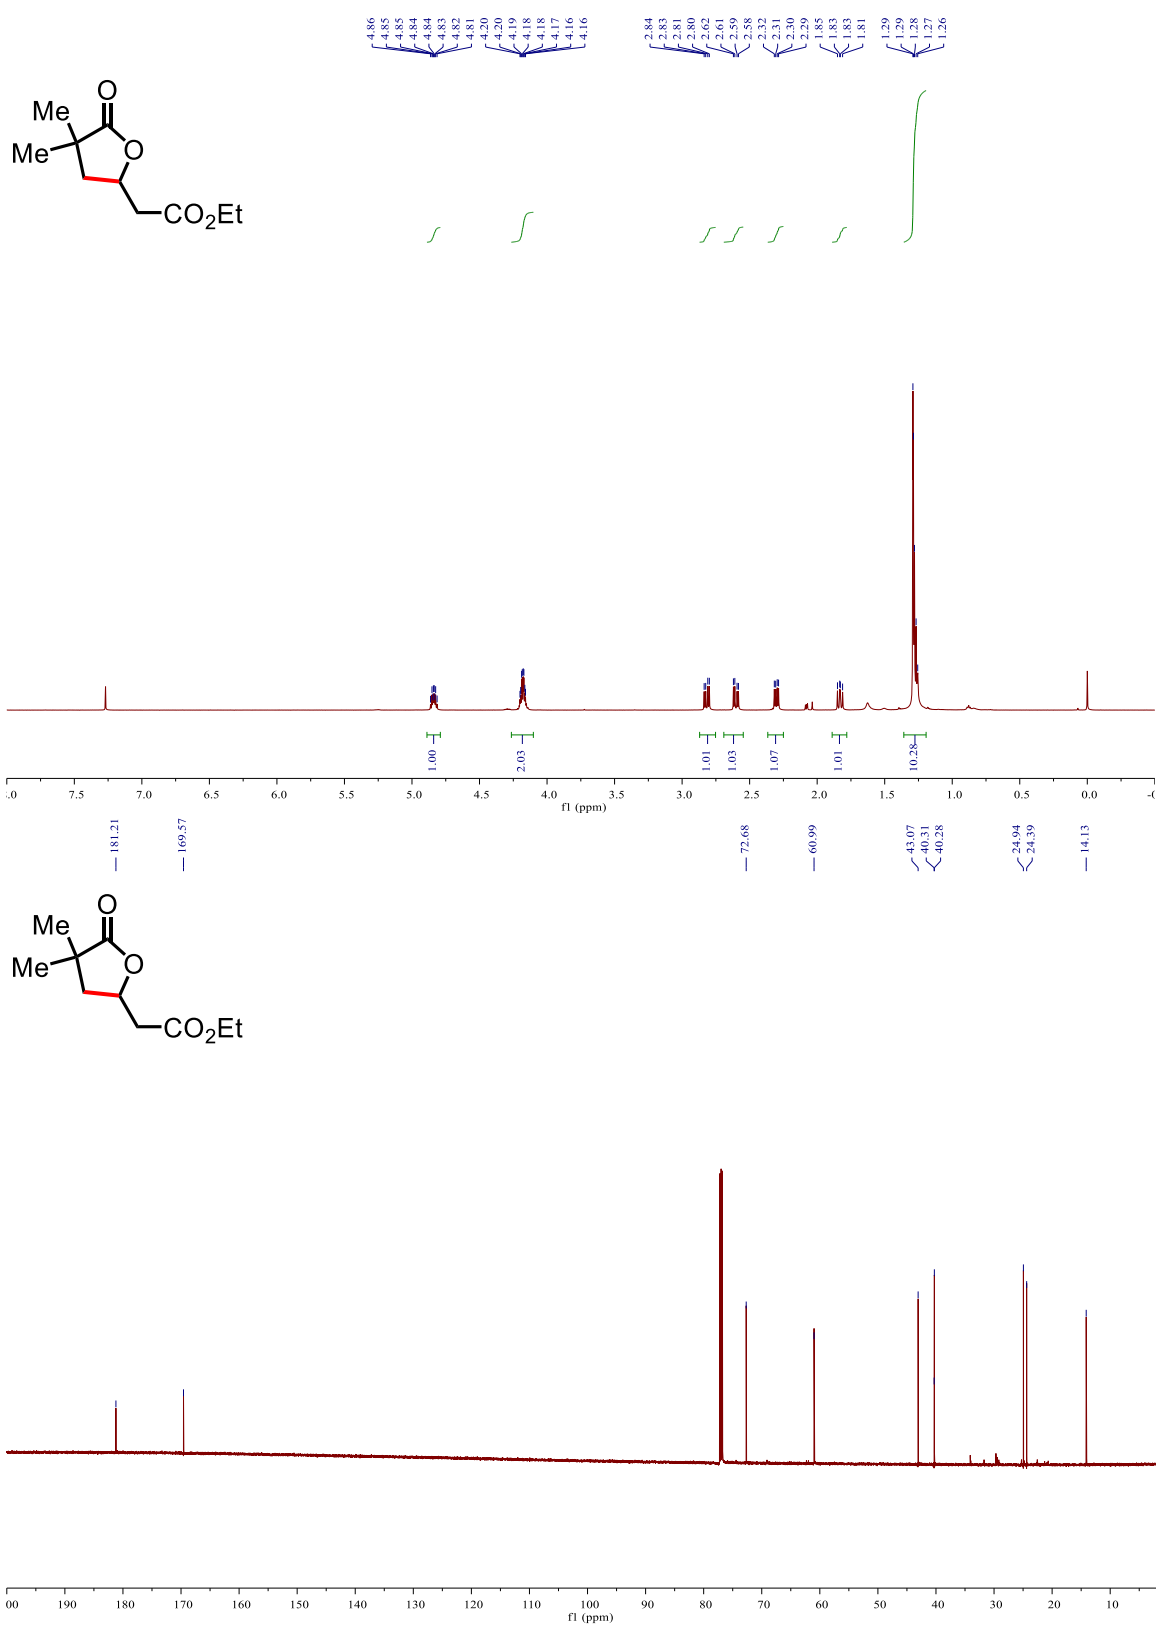



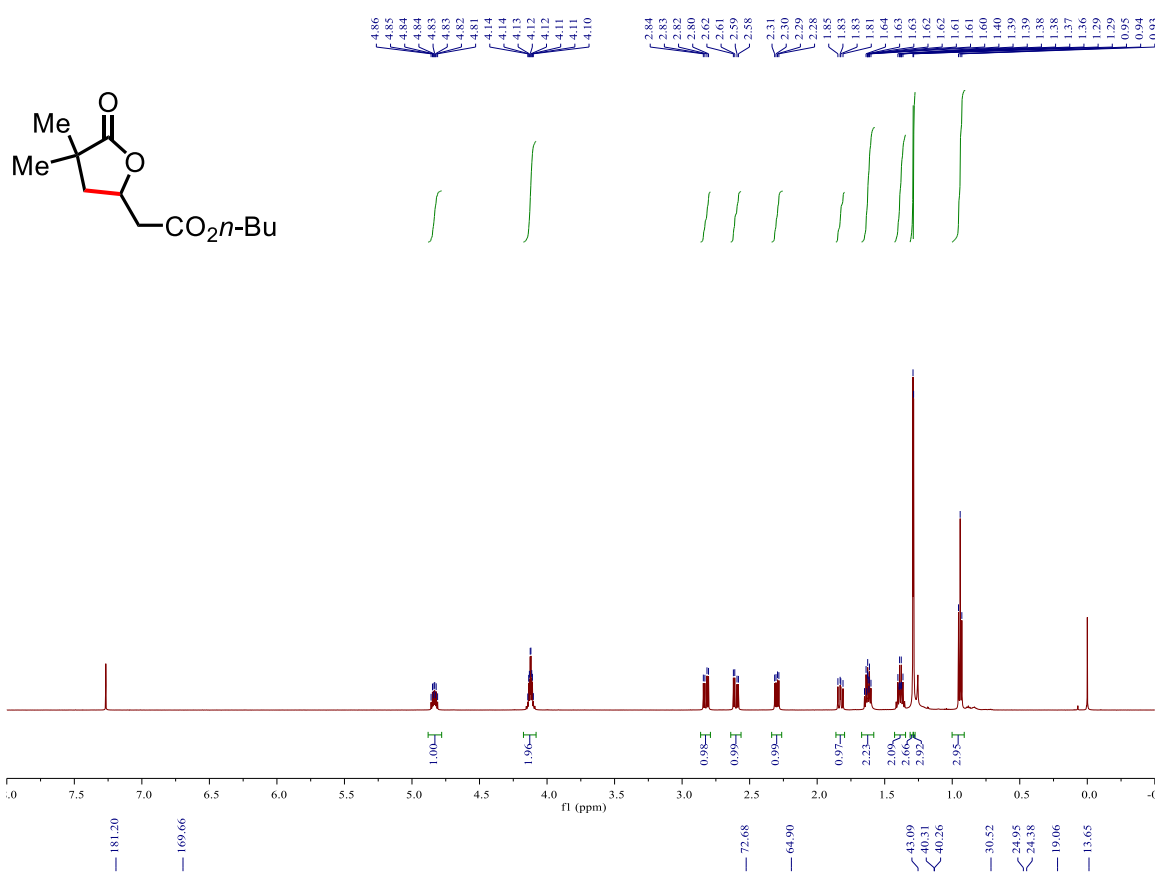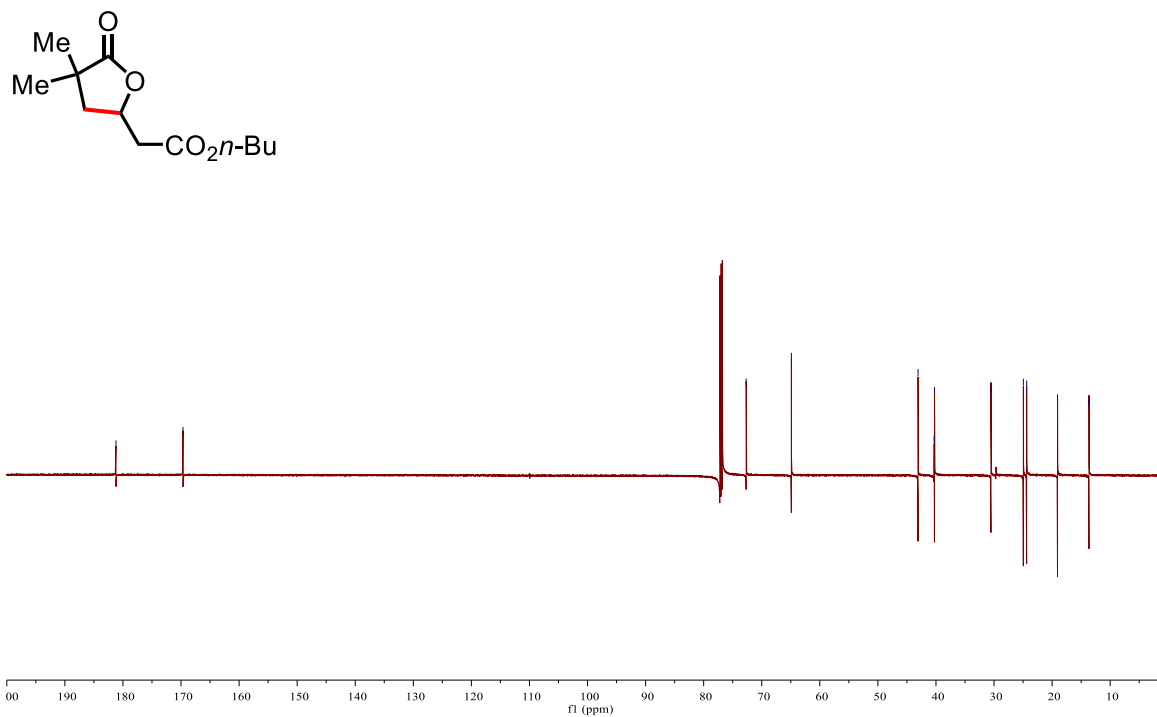

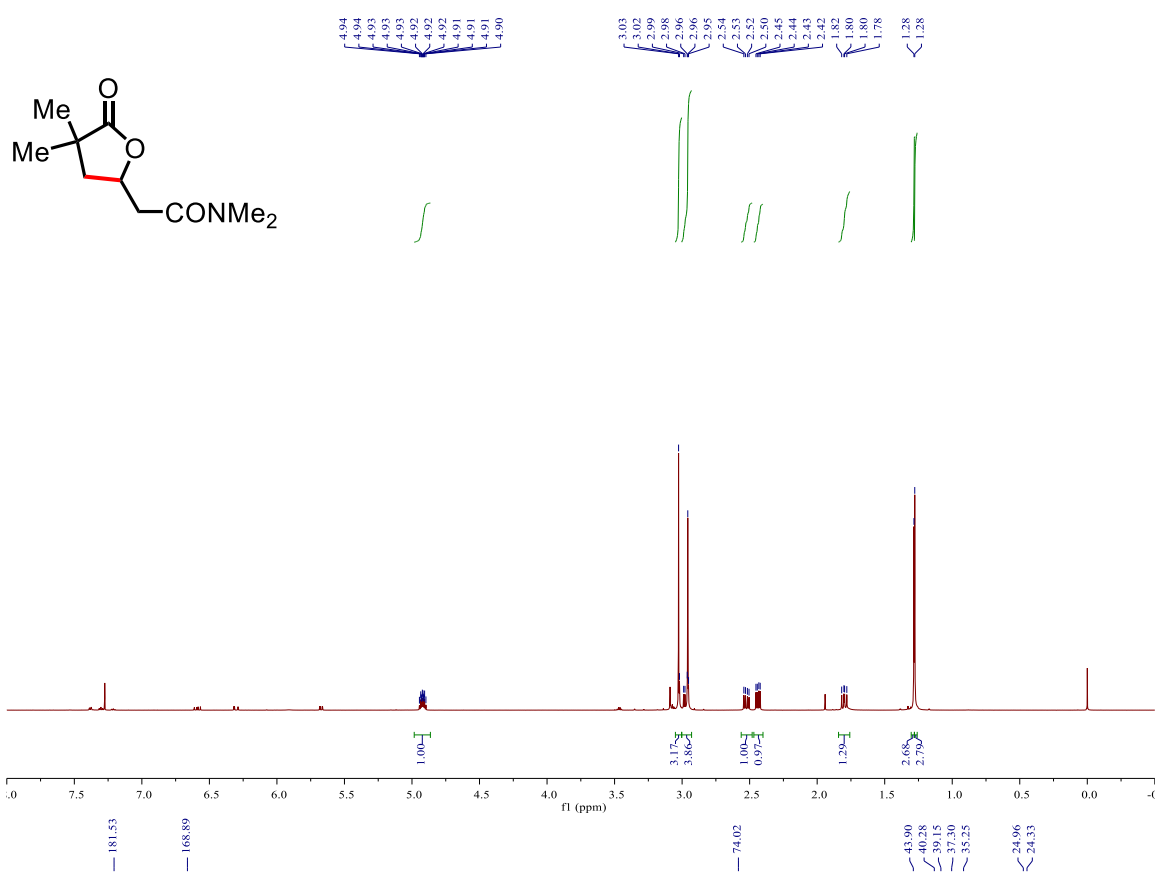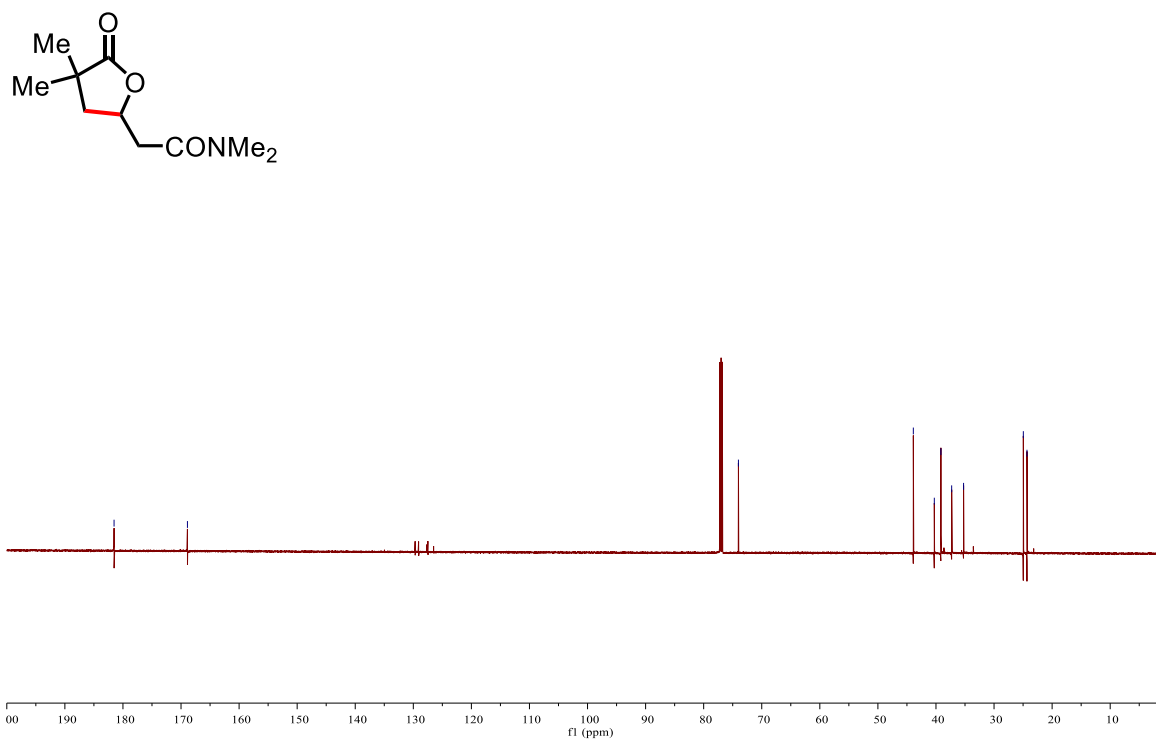

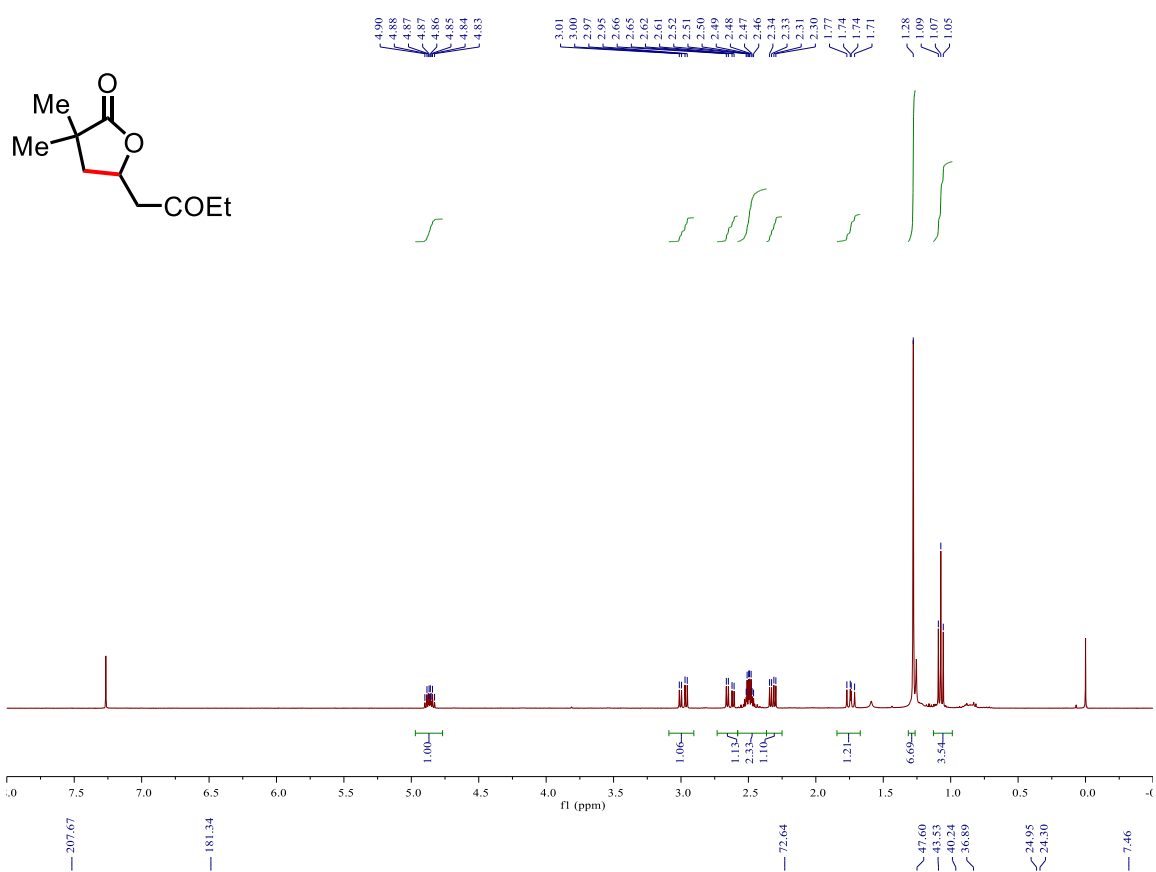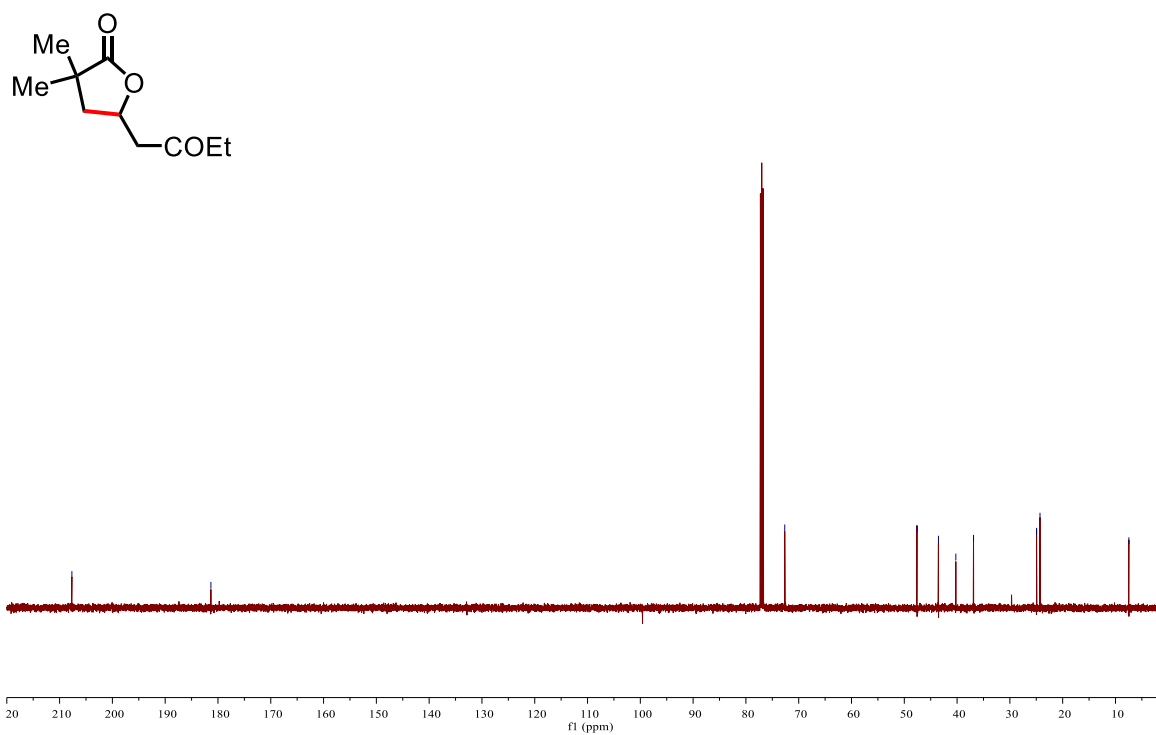

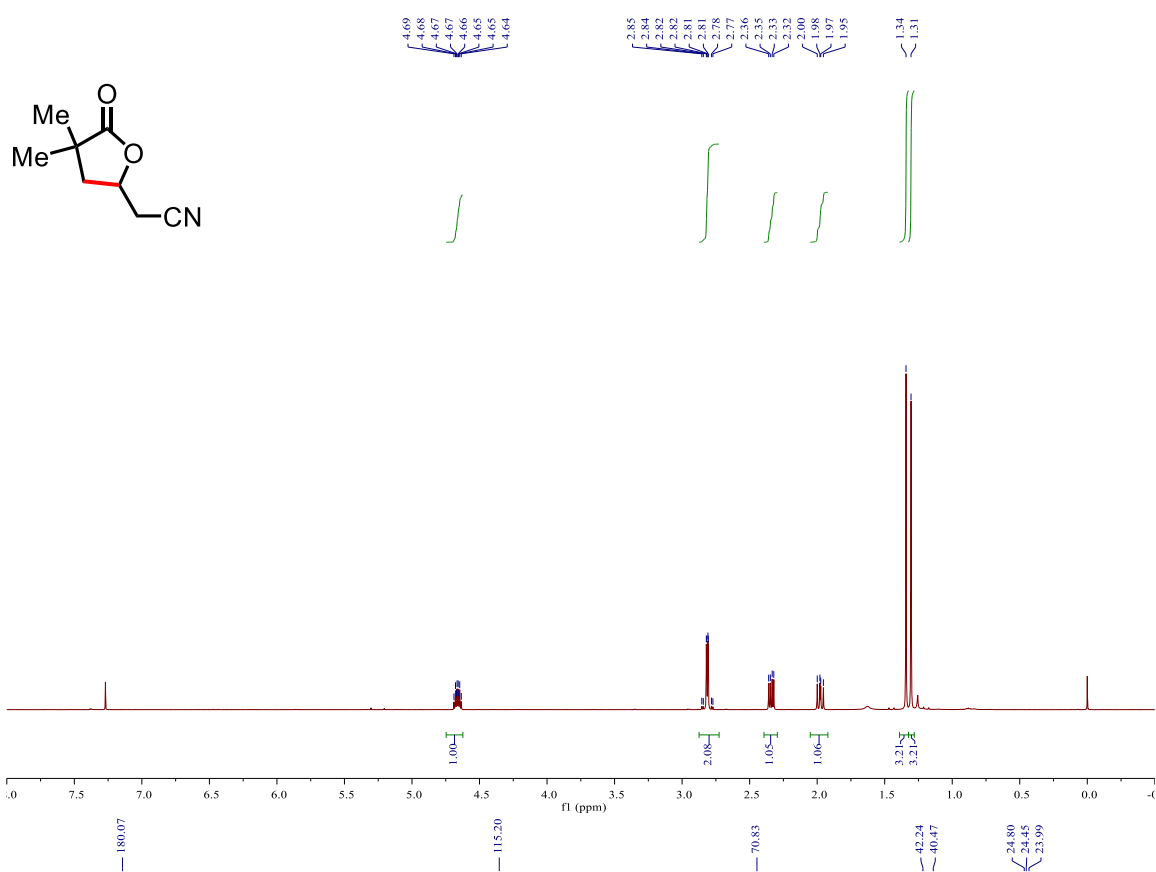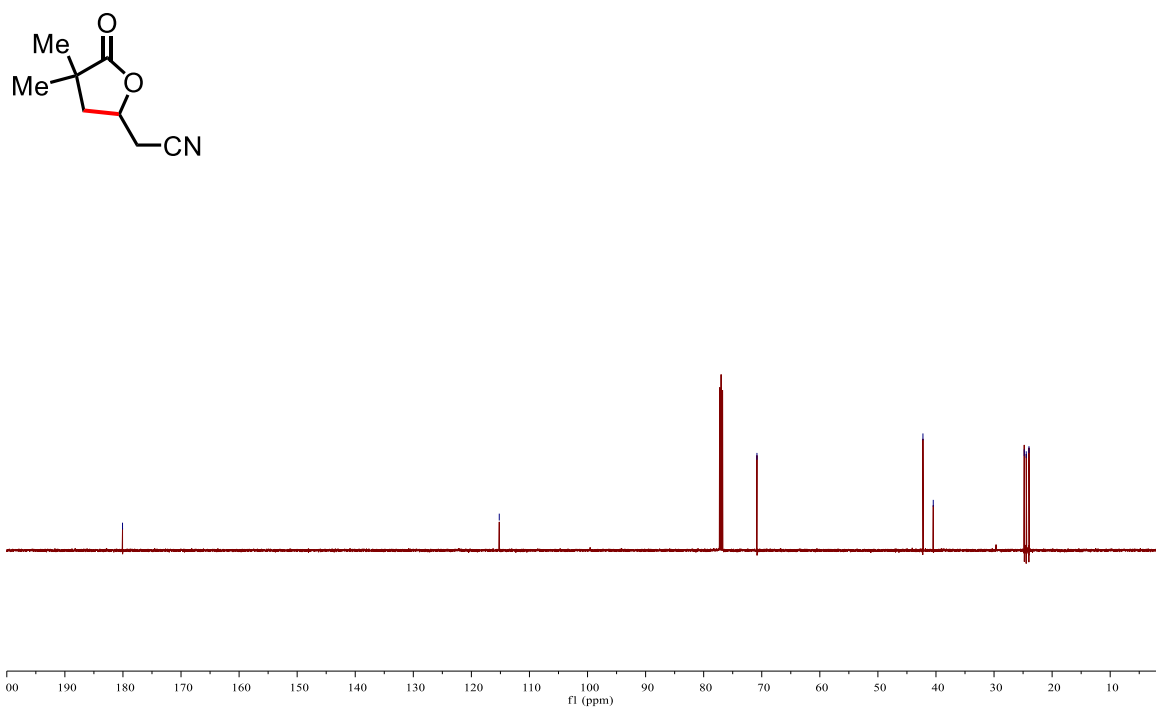

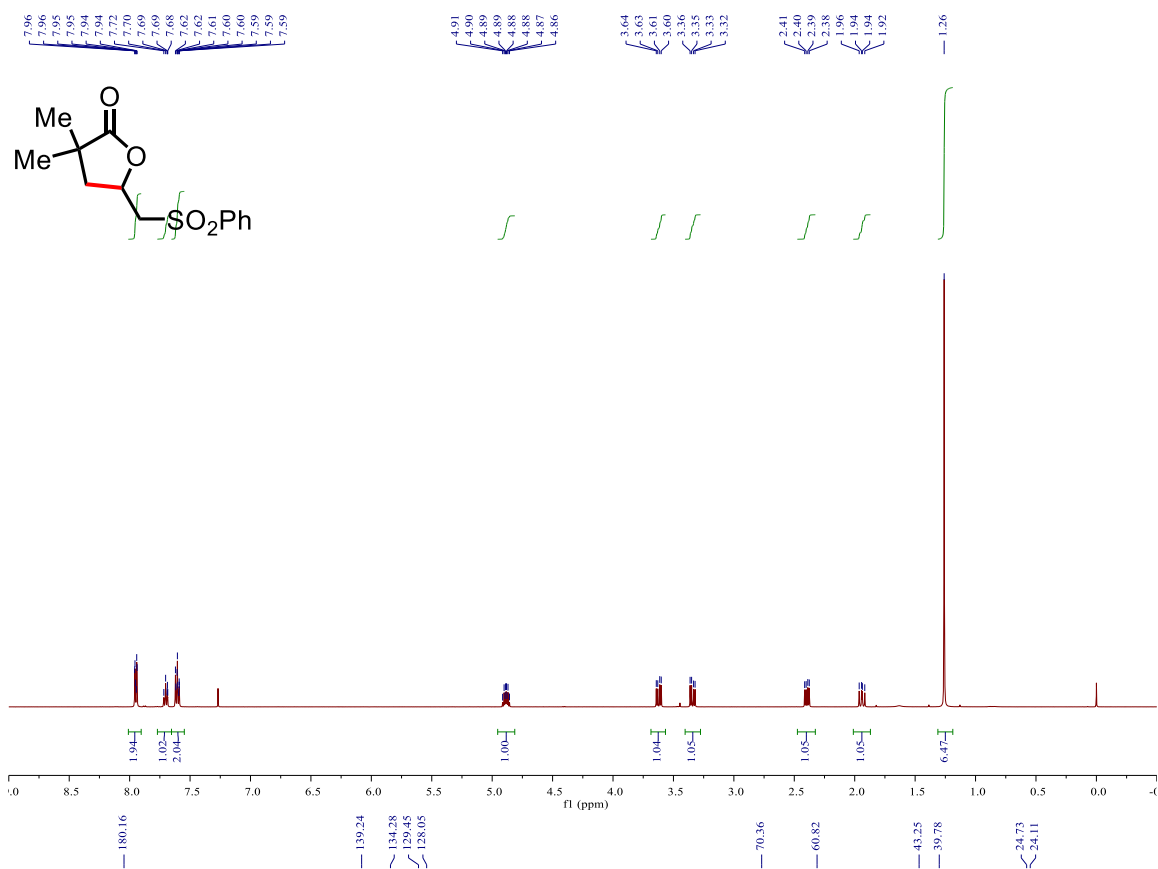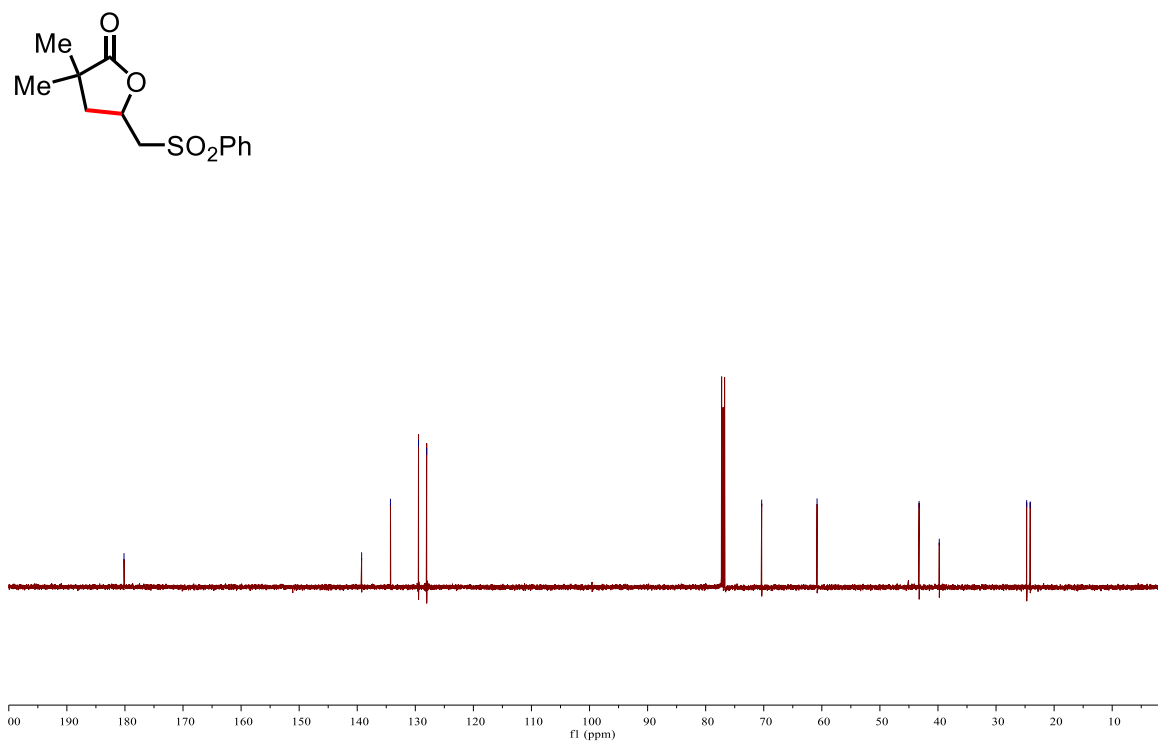

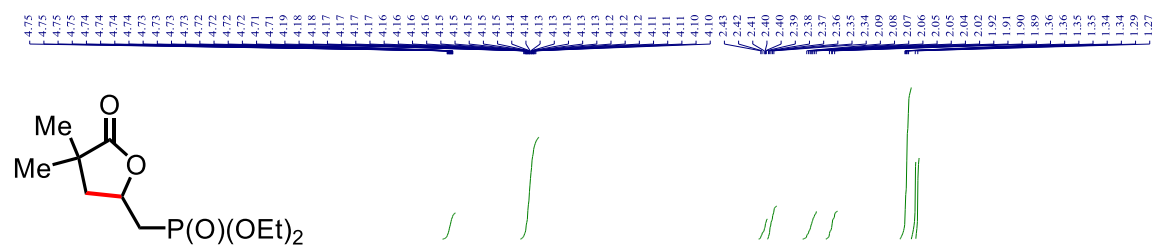

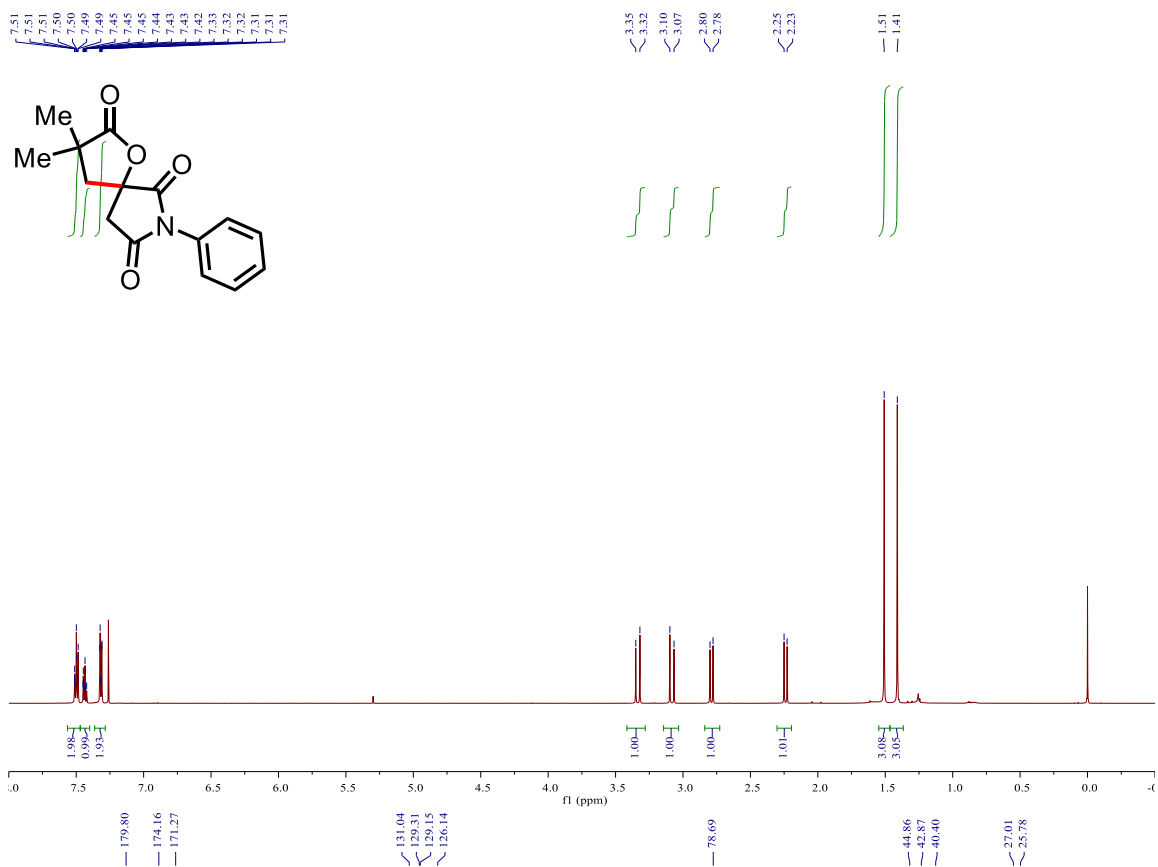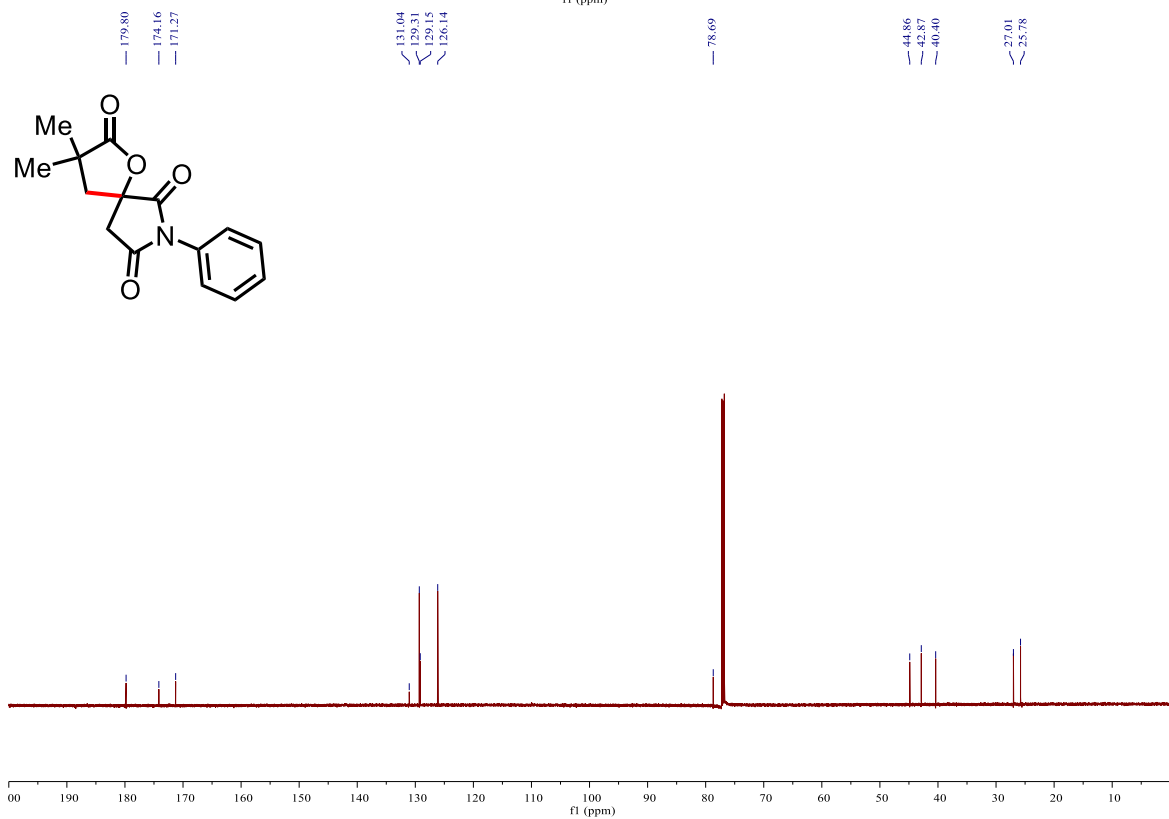

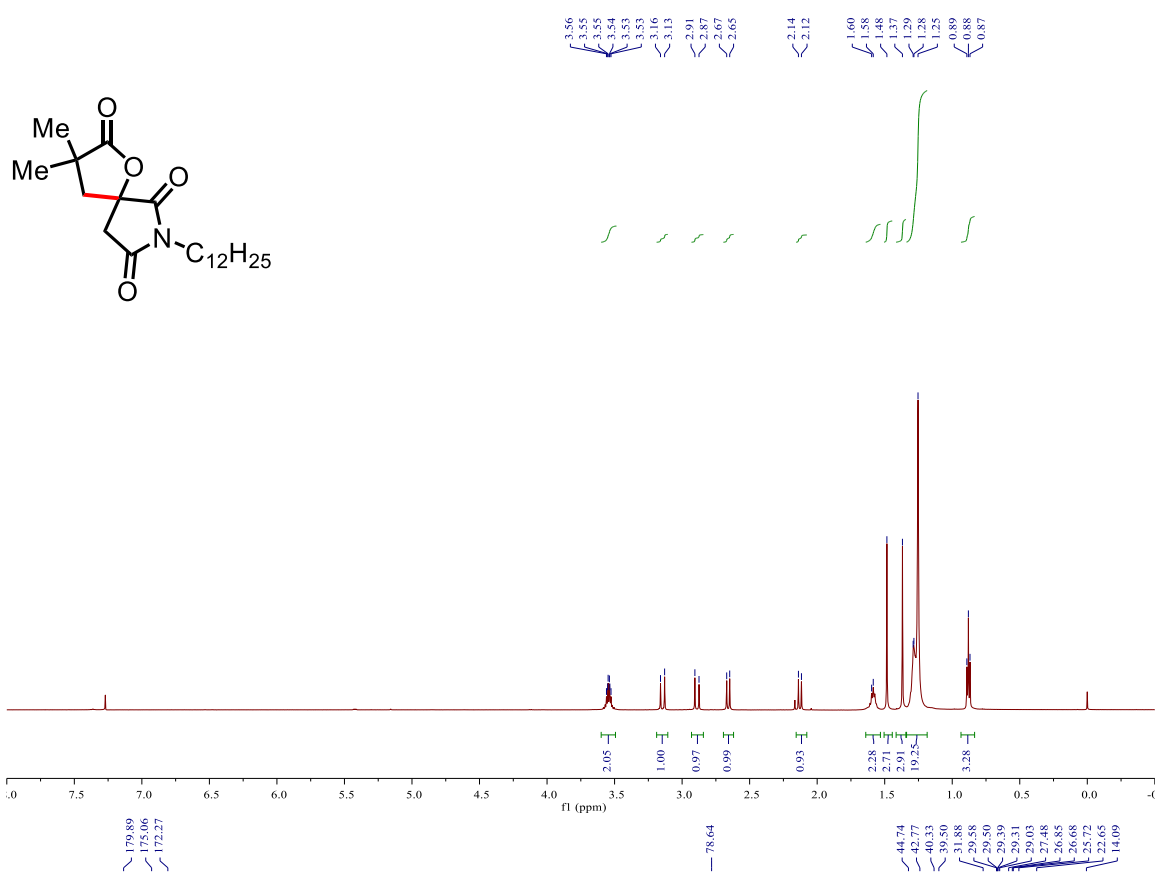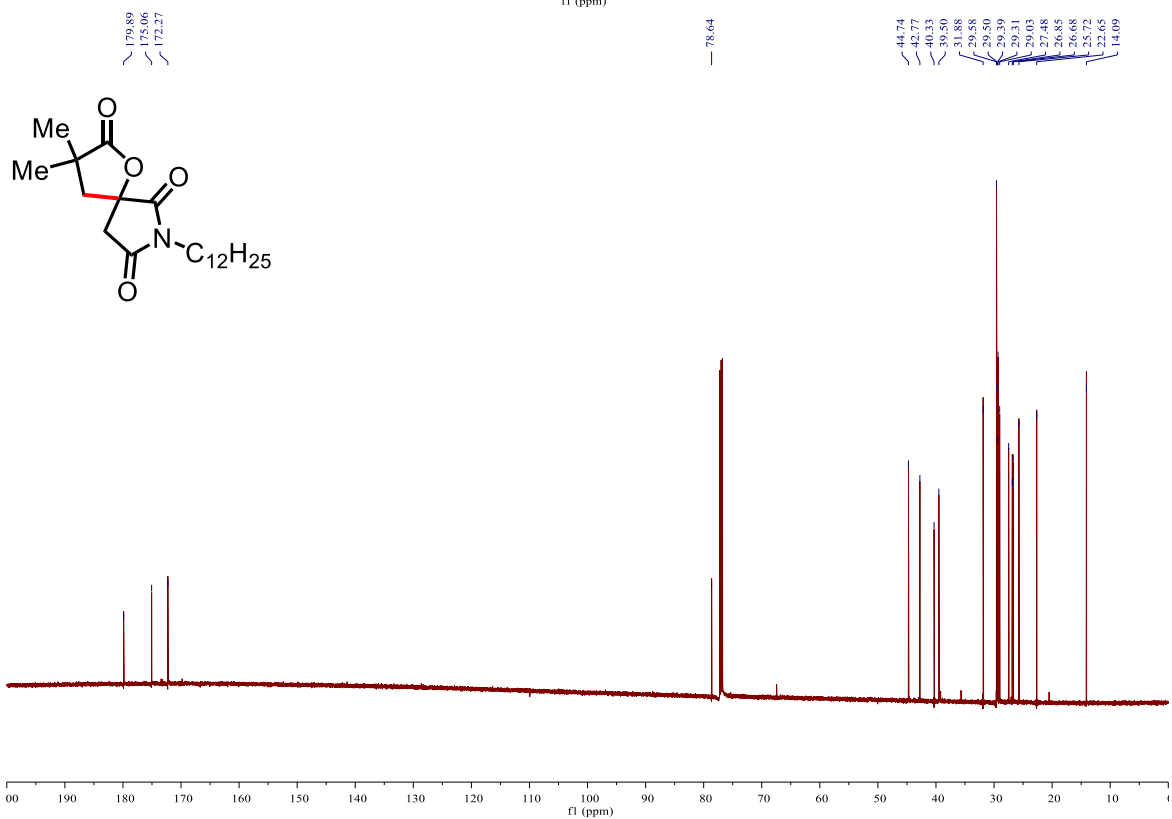



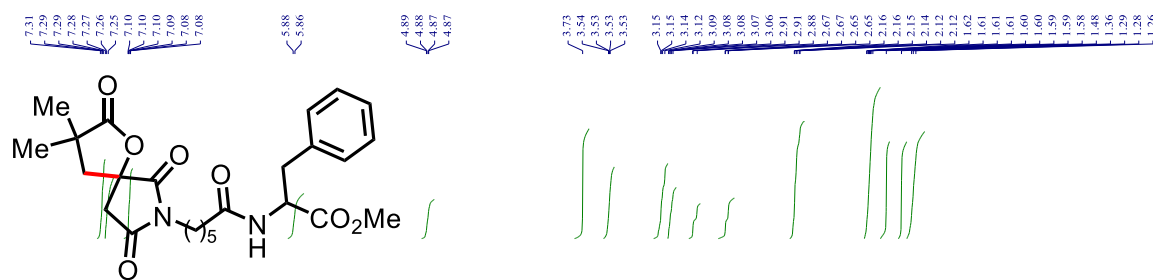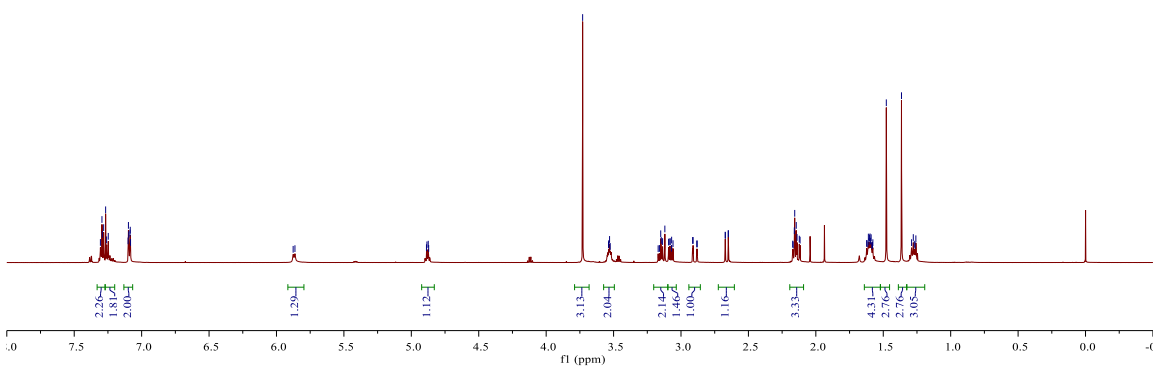

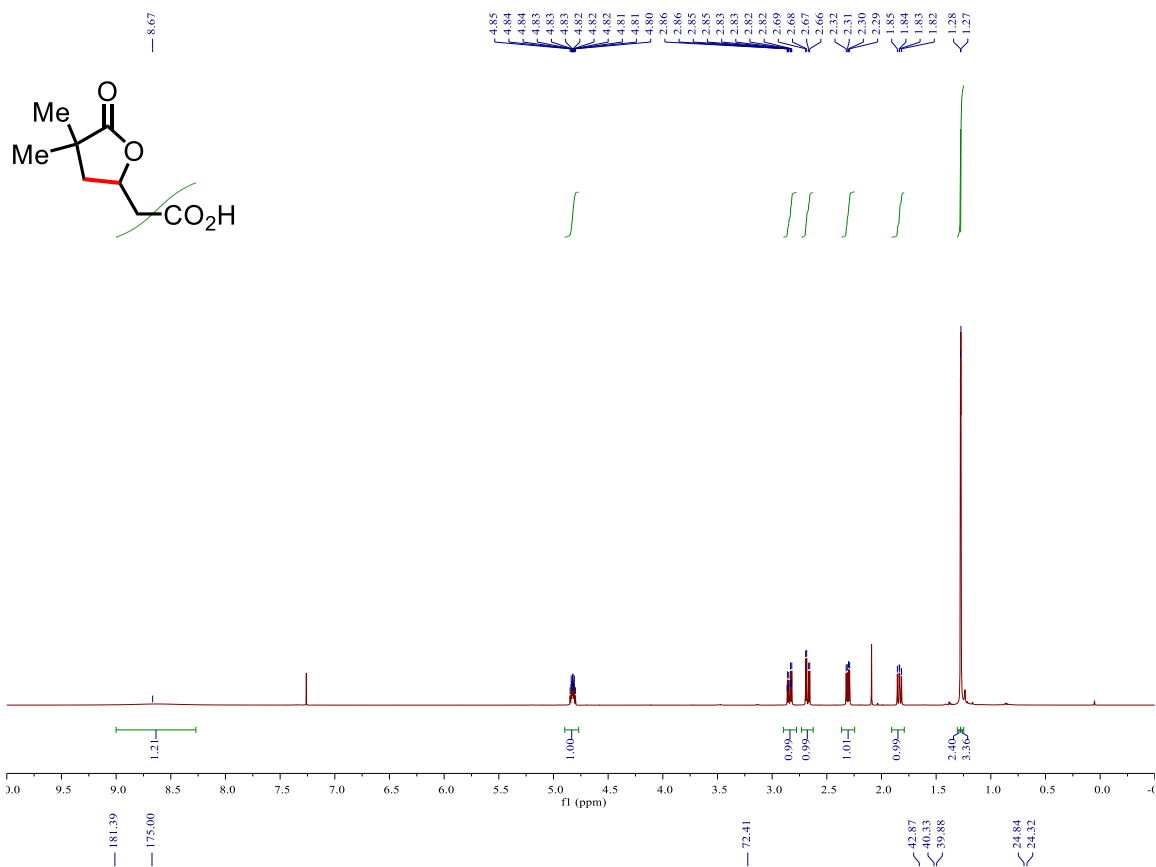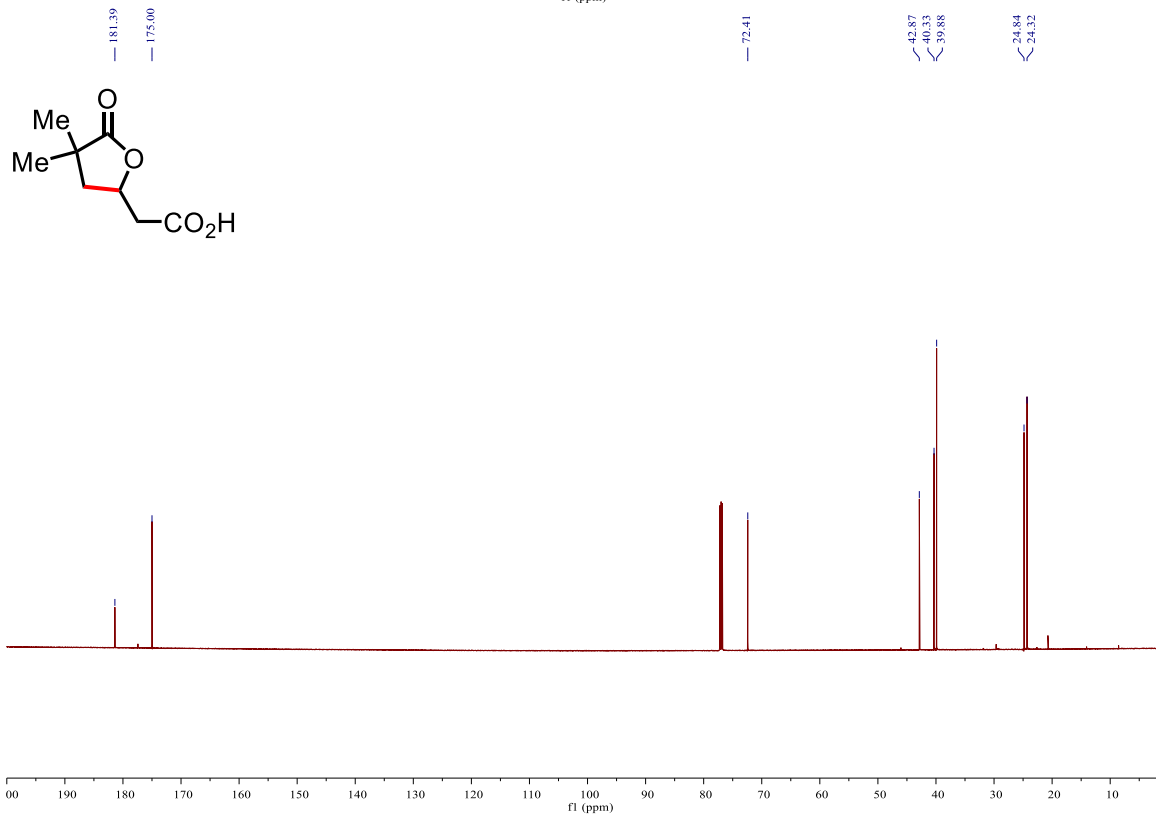

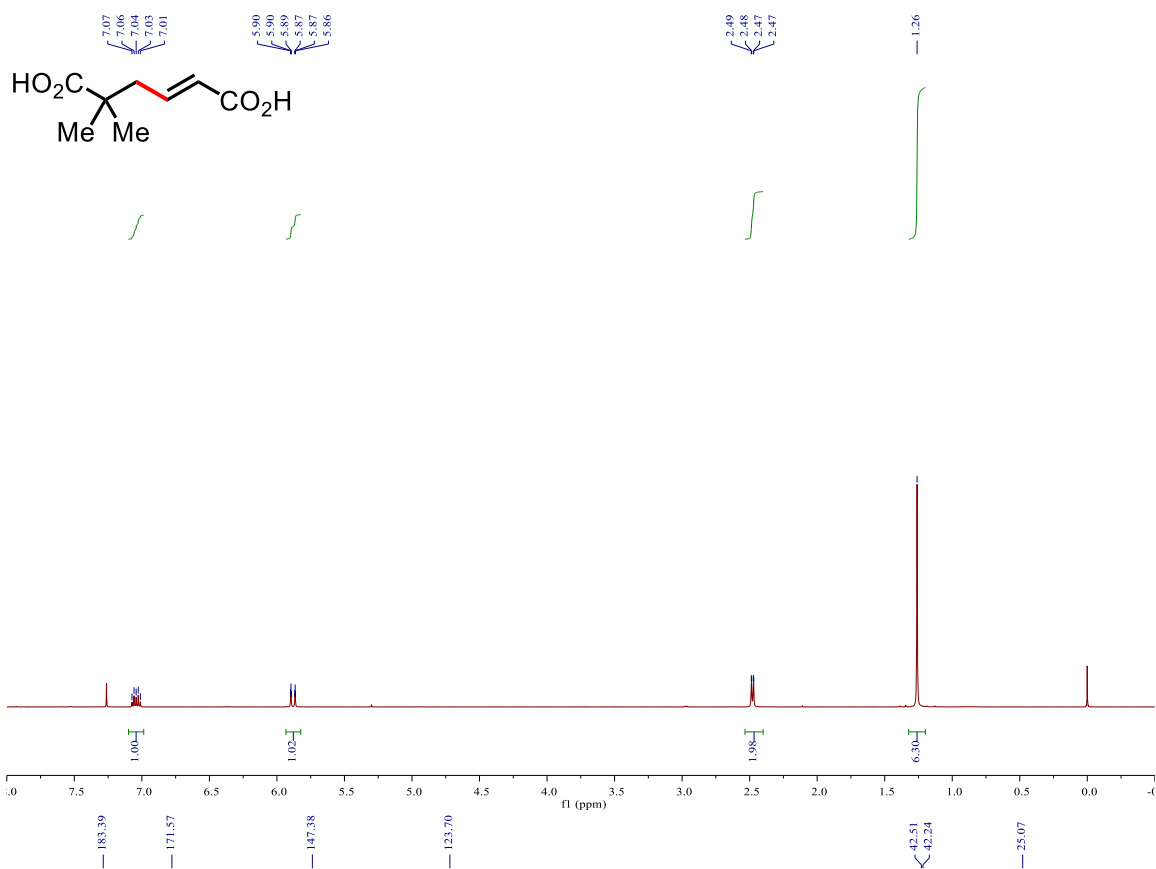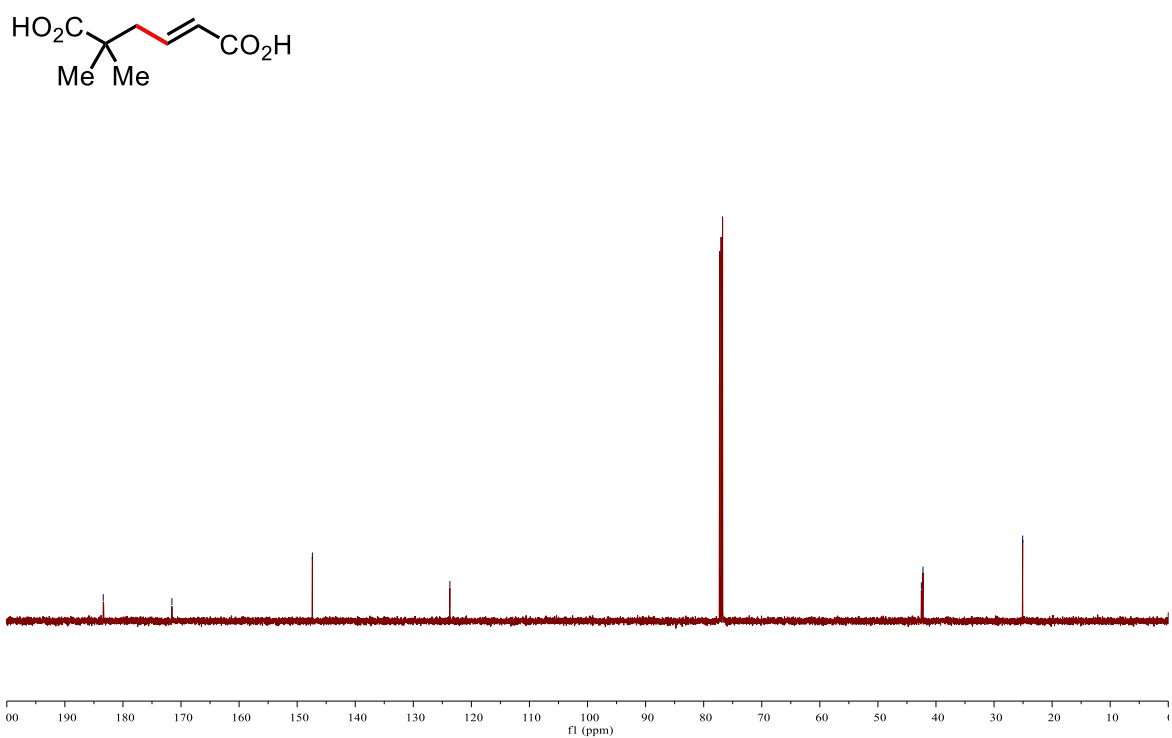

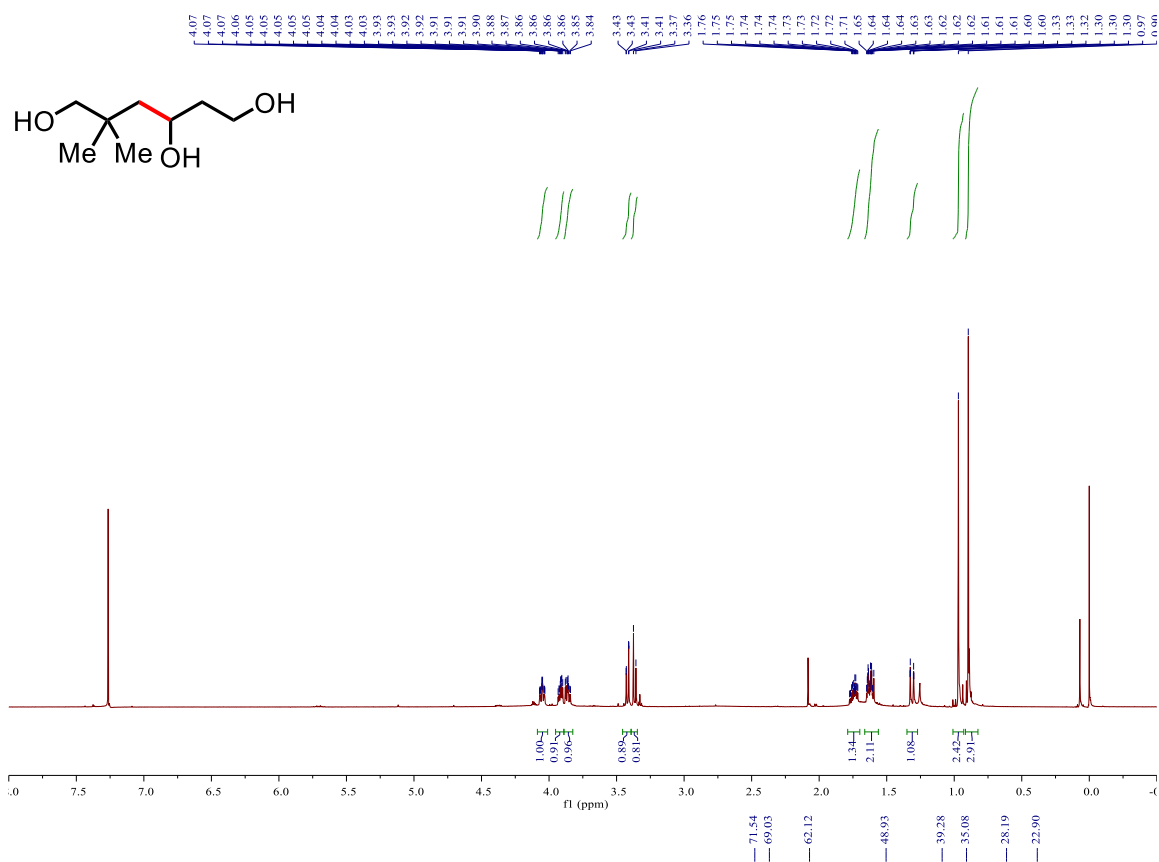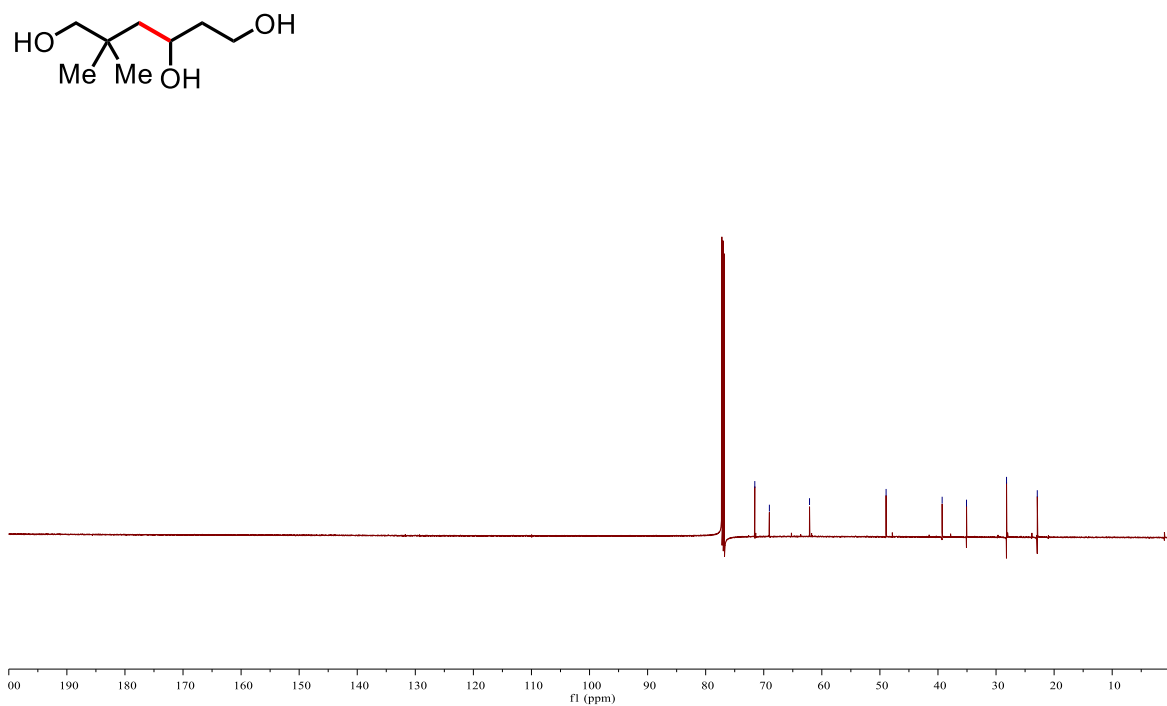

Supplement: Supplementary file 1 [file 12599642]
